# Supplementary material for: Is pharmacokinetic-guided dosing of desmopressin and von Willebrand factor-containing concentrates in individuals with von Willebrand disease or low von Willebrand factor reliable and feasible? A protocol for a multicentre, non-randomised, open label cohort trial, the OPTI-CLOT: to WiN study
Source: PubMed Central journal article supplement — BMJ Open. 2022 Feb 15;12(2):e049493. doi: 10.1136/bmjopen-2021-049493 (PMC8852670; doi:10.1136/bmjopen-2021-049493), 2022-02-15
Supplement: bmjopen-2021-049493.draft_revisions.pdf [file bmjopen-2021-049493.draft_revisions.pdf]

# BMJ Open

BMJ Open is committed to open peer review. As part of this commitment we make the peer review history of every article we publish publicly available.

When an article is published we post the peer reviewers' comments and the authors' responses online. We also post the versions of the paper that were used during peer review. These are the versions that the peer review comments apply to.

The versions of the paper that follow are the versions that were submitted during the peer review process. They are not the versions of record or the final published versions. They should not be cited or distributed as the published version of this manuscript.

BMJ Open is an open access journal and the full, final, typeset and author-corrected version of record of the manuscript is available on our site with no access controls, subscription charges or pay-per-view fees (<http://bmjopen.bmj.com>).

If you have any questions on BMJ Open's open peer review process please email [info.bmjopen@bmj.com](mailto:info.bmjopen@bmj.com)

# BMJ Open

**Implementation of pharmacokinetic-guided dosing of desmopressin and VWF-containing concentrates in von Willebrand disease and low VWF: A protocol for a multicenter, non-randomized, open label cohort trial, the OPTI-CLOT: To WiN study**

|                               |                                                                                                                                                                                                                                                                                                                                                                                                                                                                                                                                                                                                                                                               |
|-------------------------------|---------------------------------------------------------------------------------------------------------------------------------------------------------------------------------------------------------------------------------------------------------------------------------------------------------------------------------------------------------------------------------------------------------------------------------------------------------------------------------------------------------------------------------------------------------------------------------------------------------------------------------------------------------------|
| Journal:                      | <i>BMJ Open</i>                                                                                                                                                                                                                                                                                                                                                                                                                                                                                                                                                                                                                                               |
| Manuscript ID                 | bmjopen-2021-049493                                                                                                                                                                                                                                                                                                                                                                                                                                                                                                                                                                                                                                           |
| Article Type:                 | Protocol                                                                                                                                                                                                                                                                                                                                                                                                                                                                                                                                                                                                                                                      |
| Date Submitted by the Author: | 26-Jan-2021                                                                                                                                                                                                                                                                                                                                                                                                                                                                                                                                                                                                                                                   |
| Complete List of Authors:     | Heijdra, Jessica; Erasmus MC Sophia, Pediatric Hematology<br>Al Arashi, Wala; Erasmus MC Sophia, Pediatric Hematology<br>de Jager, Nico; Amsterdam UMC Location AMC, Hospital Pharmacy - Clinical Pharmacology<br>Cloesmeijer, Michael; Amsterdam UMC Location AMC, Hospital Pharmacy - Clinical Pharmacology<br>Bukkems, Laura; Amsterdam UMC Location AMC, Hospital Pharmacy - Clinical Pharmacology<br>Zwaan, Christian; Erasmus MC Sophia, Pediatric Oncology<br>Leebeek, Frank; Erasmus MC, Hematology<br>Mathôt, Ron; Amsterdam UMC Location AMC, Hospital Pharmacy - Clinical Pharmacology<br>Cnossen, Marjon; Erasmus MC Sophia, Pediatric Hematology |
| Keywords:                     | Bleeding disorders & coagulopathies < HAEMATOLOGY, Protocols & guidelines < HEALTH SERVICES ADMINISTRATION & MANAGEMENT, Clinical trials < THERAPEUTICS                                                                                                                                                                                                                                                                                                                                                                                                                                                                                                       |
|                               |                                                                                                                                                                                                                                                                                                                                                                                                                                                                                                                                                                                                                                                               |

SCHOLARONE™  
Manuscripts

1  
2  
3 1 **Implementation of pharmacokinetic-guided dosing of desmopressin and VWF-containing**  
4 **concentrates in von Willebrand disease and low VWF: A protocol for a multicenter, non-**  
5 **randomized, open label cohort trial, the OPTI-CLOT: To WiN study**  
6  
7

8 Jessica M. Heijdra<sup>1</sup>, Wala Al Arashi<sup>1</sup>, Nico C.B. de Jager<sup>2</sup>, Michael E. Cloesmeijer<sup>2</sup>, Laura H.  
9 Bukkems<sup>2</sup>, Christian M. Zwaan<sup>3</sup>, Frank W.G. Leebeek<sup>4</sup>, Ron A.A. Mathôt<sup>2</sup> & Marjon H. Cnossen<sup>1</sup>  
10  
11  
12  
13

14 <sup>1</sup>*Department of Pediatric Hematology, Erasmus MC – Sophia Children’s Hospital, University*  
15 *Medical Center Rotterdam, Rotterdam, the Netherlands*

16 <sup>2</sup>*Hospital Pharmacy – Clinical Pharmacology, Amsterdam UMC, University of Amsterdam,*  
17 *Amsterdam, the Netherlands*

18 <sup>3</sup>*Department of Pediatric Oncology, Erasmus MC – Sophia Children’s Hospital, University*  
19 *Medical Center Rotterdam, Rotterdam, the Netherlands*

20 <sup>4</sup>*Department of Hematology, Erasmus MC, University Medical Center Rotterdam, Rotterdam,*  
21 *the Netherlands*  
22  
23  
24

25  
26  
27  
28  
29  
30  
31 16 This study is part of the OPTI-CLOT research programme (Patient tailOred PharmacokineTic-  
32 guided dosing of CLOTting factor concentrates and desmopressin in bleeding disorders), an  
33 17 (inter)national multicenter study. Its aim is to construct and enrich population PK-models for  
34 18 (inter)national multicenter study. Its aim is to construct and enrich population PK-models for  
35 19 factor replacement therapy, desmopressin and alternative treatments, and to implement PK-  
36 20 guided dosing by demonstrating its implications and feasibility, thereby increasing knowledge  
37 21 of patient-tailored PK-guided dosing in bleeding disorders.  
38  
39  
40  
41  
42

43 Corresponding author:  
44

45  
46 24 Dr. Marjon H. Cnossen, MD PhD

47  
48 25 Department of Pediatric Hematology

49  
50 26 Erasmus University Medical Center – Sophia Children’s Hospital

51  
52 27 Room SP-2435

53  
54 28 P.O. Box 2040

55  
56 29 3000 CA Rotterdam  
57  
58  
59  
60

1  
2  
3 1 The Netherlands  
4

5 2 E-mail: [m.cnossen@erasmusmc.nl](mailto:m.cnossen@erasmusmc.nl)  
6

7 3  
8

9 4 Keywords: von Willebrand disease, individualized medicine, pharmacokinetics, desmopressin,  
10 factor concentrates  
11

12 6  
13

14 7  
15

16 8  
17  
18  
19  
20  
21  
22  
23  
24  
25  
26  
27  
28  
29  
30  
31  
32  
33  
34  
35  
36  
37  
38  
39  
40  
41  
42  
43  
44  
45  
46  
47  
48  
49  
50  
51  
52  
53  
54  
55  
56  
57  
58  
59  
60

1  
2  
3 **1 ABSTRACT**

4 **2 Introduction** Von Willebrand disease (VWD) is a bleeding disorder, caused by a deficiency or  
5 defect of von Willebrand factor (VWF). In case of medical interventions or bleeding, patients  
6 are treated with desmopressin and/or VWF-containing concentrates to increase plasma VWF  
7 and factor VIII (FVIII). However, in many cases these levels are outside the targeted range.  
8 Therefore, population pharmacokinetic (PK) models have been developed, which aim to  
9 quantify and explain intra-individual and inter-individual differences in treatment response.  
10 These models enable calculation of individual PK parameters by Bayesian analysis, based on an  
11 individual desmopressin test or PK profile with a VWF-containing concentrate. Subsequently,  
12 the dose necessary for an individual to achieve coagulation factor target levels can be  
13 calculated.

14 **12 Methods and analysis** Primary aim of this study is to assess the predictive performance - the  
15 difference between predicted and measured von VWF activity and FVIII levels - of Bayesian  
16 forecasting using the developed population PK models in four different situations: A)  
17 desmopressin testing (n ≥30); B) medical interventions (n = 70: 30 receiving desmopressin, 30  
18 receiving VWF-containing concentrate and 10 receiving a combination of both); C) bleeding  
19 episodes (n = 20: 10 receiving desmopressin and 10 receiving VWF containing concentrate); and  
20 D) prophylaxis with a VWF containing concentrate (n = 3 to 5). Individuals with all types of VWD  
21 and individuals with low VWF (VWF 0.30-0.60 IU/mL) will be included. Reliability and feasibility  
22 of PK-guided dosing will be tested by assessing predictive performance, treatment duration,  
23 hemostasis, patient satisfaction and physician satisfaction.

24 **22 Ethics and dissemination** The OPTI-CLOT:To WiN study was approved by the medical ethics  
25 committee of the Erasmus MC, University Medical Center Rotterdam, the Netherlands. Results  
26 of the study will be communicated through publication in international scientific journals and  
27 presentation at (inter)national conferences.

28 **26 Trial registration number:** NL7212 (NTR7411); Pre-results.

## 1 STRENGTHS AND LIMITATIONS OF THIS STUDY

- 2 - The OPTI-CLOT: To WiN study is a multicenter prospective trial, including individuals  
3 with VWD and low VWF from hemophilia treatment centers in the Netherlands.
- 4 - Population pharmacokinetic models for desmopressin and VWF-containing concentrates  
5 have been developed and will now be tested in clinical practice.
- 6 - By Bayesian adaptive dosing based on population pharmacokinetic models and  
7 measured coagulation factor levels, dosing of desmopressin and VWF-containing  
8 concentrates may be improved, with less levels below or above target.
- 9 - Treatment choice (desmopressin and/or Willebrand factor containing concentrate) and  
10 brand of medication will be at the discretion of the treating physician.
- 11 - The developed population pharmacokinetic models will be tested in different situations:  
12 during desmopressin testing, during treatment for medical interventions or bleeding,  
13 and during prophylactic treatment.

## 1 INTRODUCTION

2 Von Willebrand disease (VWD) is the most common inherited bleeding disorder.<sup>1</sup> It is caused by  
3 a defect of von Willebrand factor (VWF), which can be either quantitative or a qualitative. VWF  
4 is essential for primary hemostasis as it facilitates platelet plug formation at sites of vascular  
5 injury. It also plays a role in secondary hemostasis, as it protects factor VIII (FVIII) from being  
6 cleared from the circulation. Symptoms of VWD include bleeding after trauma or surgery and  
7 (spontaneous) mucocutaneous bleeding. Individuals with VWD are classified into three main  
8 types: type 1 and type 3 are respectively partial (VWF <0.30 IU/mL) and complete (VWF <0.05  
9 IU/mL) quantitative defects, whereas type 2 comprises several qualitative defects of VWF.<sup>2</sup>  
10 Individuals with low VWF have a bleeding tendency combined with VWF levels between 0.30  
11 IU/mL and the lower limit of normal.<sup>3</sup>

12 Individuals with VWD are treated with desmopressin or -in more severe cases or when  
13 prophylactic therapy is needed- VWF-containing concentrates. Main reasons for treatment are  
14 acute bleeding and prevention of bleeding during medical interventions, e.g. dental procedures,  
15 surgery or delivery. Prophylactic treatment to prevent spontaneous bleeding is seldom  
16 necessary and mainly applied in type 3 and severely affected type 1 and 2 patients. Aim of  
17 treatment is to accomplish sufficient hemostasis by achieving physiologically normal plasma  
18 coagulation factor levels. However, it has been previously reported that a majority of patients  
19 achieves higher coagulation factor levels than aimed for, and a minority does not reach  
20 sufficient levels for adequate hemostasis.<sup>4</sup> This may lead to an increased risk of either  
21 thrombosis or bleeding. Moreover, costs of treatment are unnecessarily high as VWF-  
22 containing factor concentrates are expensive and frequent laboratory monitoring of plasma  
23 VWF and FVIII is usually required. As rising health care costs are an increasing global concern, it  
24 is important to investigate alternative dosing strategies that facilitate more precise dosing, to  
25 improve quality of care with potential reduction of costs.

26 Currently, desmopressin dosage and dosing frequency are solely based on body weight  
27 and estimated degree of tachyphylaxis. Dosing of VWF-containing concentrates is also based on  
28 body weight, and dose calculations are made according to target VWF and FVIII values based on  
29 the severity of the bleed or the type of medical intervention.<sup>5</sup> However, pharmacokinetics (PK)

1 of desmopressin and VWF-containing concentrates differ within and between patients (i.e.  
2 intra-individual and inter-individual differences), and large inter-individual differences in  
3 response to desmopressin are observed.<sup>6-8</sup> Population PK models that describe plasma VWF  
4 activity (VWF:Act) and FVIII after administration of desmopressin or VWF-containing  
5 concentrates, based on retrospective data, have been constructed by our group (however not  
6 all models have been published yet).<sup>9 10</sup>

7         With these population PK models, we are able to perform Bayesian forecasting.  
8 Individual VWF:Act and FVIII PK parameters are calculated, based on patient characteristics  
9 combined with VWF:Act and FVIII measurements after an individual test dose of desmopressin  
10 or VWF-containing concentrate, or by using data acquired during a bleeding episode or medical  
11 intervention. Based on the estimated individual PK parameters, we are able to design a  
12 personalized dosing strategy for each patient. We hypothesize that PK-guided dosing of  
13 desmopressin and VWF-containing concentrates may strongly improve efficacy of therapy and  
14 lower treatment costs. It is essential to first evaluate the predictive performance of PK-guided  
15 dosing and the feasibility of this approach prospectively, in order to prove its effectiveness and  
16 safety.

## 18 **OBJECTIVE**

19 To prospectively investigate the reliability and feasibility of PK-guided dosing of desmopressin  
20 and VWF-containing concentrates in individuals with VWD and low VWF.

## 22 **METHODS**

### 23 **Trial design**

24 The OPTI-CLOT: To WiN trial is a multicenter, non-randomized, open label cohort study. The  
25 study was approved by the Medical Ethics Committee of the Erasmus MC, University Medical  
26 Center Rotterdam, the Netherlands, and was registered in the Netherlands Trial Register with  
27 trial registration number NL7212 and to EudraCT with number 2018-001631-46. The first  
28 patient was included on April 8th, 2019. The planned end date of the study is October 1st,  
29 2023.



## 1 **Study population**

2 After obtaining informed consent, individuals with VWD or low VWF who will undergo a  
3 desmopressin test, will require hemostatic treatment with monitoring of VWF:Act and FVIII  
4 during a medical intervention or during a bleeding episode, or will receive prophylaxis with a  
5 VWF-containing concentrate, will be enrolled. Patients will be recruited from Hemophilia  
6 Treatment Centers in the Netherlands.

## 7 **Inclusion criteria**

- 8 - Individuals of all ages with any type of VWD or low VWF with historically lowest VWF  
9 antigen (VWF:Ag), VWF:Act and/or VWF collagen binding (VWF:CB) level <0.60 IU/mL, or  
10 historically lowest FVIII level <0.40 IU/mL (only in case of type 2N VWD);
- 11 - Scheduled to undergo a desmopressin test, and/or;
- 12 - Scheduled to undergo a medical intervention (e.g. dental procedure, surgery, diagnostic  
13 procedure or in-hospital child delivery), requiring treatment with desmopressin and/or a  
14 VWF-containing concentrate (Haemate P, Wilate, Wilfactin or Veyvondi) with  
15 monitoring of VWF and FVIII levels, or;
- 16 - With bleeding requiring treatment with desmopressin and/or a VWF-containing  
17 concentrate with monitoring of VWF and FVIII levels, or;
- 18 - Requiring prophylaxis with a VWF-containing concentrate due to frequent bleeding  
19 episodes;
- 20 - Informed consent if patient is  $\geq 12$  years and parental informed consent if patient is <12  
21 years.

## 22 **Exclusion criteria**

- 23 - Any other known hemostatic abnormalities;
- 24 - Acquired VWD;
- 25 - Presence of VWF antibodies (>0.2 BU);

## 1 **Intervention**

2 Predictive performance will be tested in all study arms, and feasibility of PK-guided dosing will  
3 be tested in arm B, C and D:

4 Arm A: patients who will undergo a desmopressin test.

5 Arm B: patients who will undergo an elective medical intervention.

6 Arm C: patients with a bleeding episode.

7 Arm D: patients receiving or requiring prophylaxis.

### 8 9 **Desmopressin testing (arm A)**

10 In standard VWD care, most patients (except most type 2B VWD patients and all type 3 VWD  
11 patients) undergo a desmopressin test to determine their individual response to desmopressin.

12 In individuals who will undergo a desmopressin test, VWF:Act and FVIII response will be  
13 predicted a priori based on the constructed population PK-model and individual patient  
14 characteristics. During the desmopressin test, VWF:Act and FVIII will be measured before  
15 desmopressin administration and at least at 1 hour and 3-4 hours after desmopressin  
16 administration (0.3 µg/kg intravenously or subcutaneously or 300 µg (or 150 µg if body weight  
17 is <50 kg) intranasally).

### 18 19 **On demand treatment (arm B+C)**

20 During elective medical interventions and during bleeding episodes, we will aim for VWF:Act  
21 and FVIII target plasma levels as defined in the national guidelines (table 1).<sup>11</sup> However, the  
22 treating physician will be able to set specific VWF:Act and FVIII target levels when indicated due  
23 to the individuals' bleeding phenotype or severity of the medical intervention or bleed, as is  
24 standard practice. These patient-specific target levels will be recorded prior to treatment and  
25 will be communicated to the clinical pharmacologist performing PK modelling. The  
26 pharmacologist will then provide a dosing strategy based on the patients' characteristics and  
27 individual desmopressin test and/or VWF-containing concentrate PK profile (performed prior to  
28 the intervention with the specific concentrate that will be used during the procedure),  
29 combined with the population PK model for desmopressin or the specific concentrate. When, at

1 any time during the treatment period, target VWF:Act and FVIII plasma levels are not reached,  
 2 additional desmopressin and/or VWF-containing concentrate can be administered by the  
 3 treating physician to secure hemostasis. Therefore, bleeding risk for patients participating in  
 4 the study will not be higher than in patients treated according to standard protocol.

5  
 6 **Table 1** Guidelines for substitution with VWF-containing concentrate in VWD according to  
 7 Dutch national guidelines.<sup>11</sup>

| Indication        | Target levels                                                                 |
|-------------------|-------------------------------------------------------------------------------|
| Dental extraction | FVIII:C and VWF:RCo >0.50 IU/mL                                               |
| Surgery           | Prior to surgery and 36 hours postoperatively FVIII:C and VWF:RCo >0.80 IU/mL |
| Major surgery     | FVIII:C >0.50 IU/mL during 7-10 days                                          |
| Minor surgery     | FVIII:C >0.50 IU/mL during 3 days and >0.30 IU/mL during 4-7 days             |

8 FVIII:C = Factor VIII activity; VWF:RCo = von Willebrand factor ristocetin cofactor

## 10 Prophylaxis (D)

11 In individuals receiving or requiring prophylaxis with a VWF-containing concentrate due to  
 12 frequent bleeding episodes, patients will first undergo PK-profiling in order to determine the  
 13 optimal dosage of VWF-containing concentrate on basis of VWF:Act or FVIII target trough and  
 14 peak values as set by the treating physician and patients' individual PK parameters as derived  
 15 by Bayesian analysis. Patients will initially receive PK-guided treatment for 12 weeks. During  
 16 this period, plasma VWF:Act and FVIII will be measured and will be compared to predicted  
 17 VWF:Act and FVIII to validate the advised dosing regimen. Information on bleeding episodes  
 18 will be obtained from medical records. Participants will be followed up for a period of 24 weeks  
 19 in which additional data will be collected in order to assess the association between plasma  
 20 VWF:Act and FVIII concentrations and bleeding events.

### 1 **Individual pharmacokinetic profiling**

2 For every patient in arm B, C and D, an individualized dosing strategy will be provided based on  
3 body weight, type and severity of the intervention or bleeding, target VWF:Act and FVIII,  
4 baseline VWF:Act and FVIII and, if possible, an individual PK profile. Patients who will undergo  
5 an intervention requiring VWF-containing concentrate and patients who will receive  
6 prophylaxis, will undergo PK profiling with the VWF-containing concentrate of choice. Blood  
7 sampling for VWF and FVIII will be performed directly before bolus infusion and at  
8 approximately 10 minutes, 2 to 6 hours, 24 hours and 48 hours after infusion.

### 10 **Population PK models**

11 Population PK models for desmopressin and different VWF-containing concentrates have been  
12 constructed using NONMEM® software (not all models have been published yet)<sup>9 10</sup>. These  
13 models are able to predict average PK parameters for VWF:Act and FVIII in a population  
14 individuals with VWD and low VWF as well as the inter-individual variability of these PK  
15 parameters, and intra-individual variability of some of the PK parameters.

16 In these PK models, the relationship between different patient factors and treatment  
17 factors, i.e. age, sex, weight, baseline VWF and FVIII, blood type and VWF levels and PK  
18 parameters are described. This allows a priori prediction of the PK of VWF:Act and/or FVIII after  
19 desmopressin and VWF-containing concentrate administration. Combining an individual PK  
20 profile with the population PK model will allow for better prediction of the required doses and  
21 dosing frequency and also better prediction of the concomitant plasma coagulation factor  
22 levels than prediction based on the population PK model alone.

### 24 **Primary endpoints**

25 Arm A (desmopressin testing): predictive performance of the desmopressin population PK  
26 model: reliability of predicted VWF:Act and FVIII levels, defined as the difference between  
27 predicted and actual VWF:Act and FVIII levels.

1  
2  
3 1 Arm B (elective medical interventions requiring treatment with desmopressin and/or VWF-  
4 containing concentrate): predictive performance of the Bayesian adaptive approach using the  
5 population PK model for desmopressin and/or VWF-containing concentrate, i.e. reliability of  
6 the predicted VWF:Act and FVIII levels, defined as the difference between predicted and actual  
7 VWF:Act and FVIII levels achieved after dosing.  
8  
9  
10  
11  
12  
13

14 7 Arm C (bleeding episode requiring treatment with desmopressin or VWF-containing  
15 concentrate): predictive performance of the respective population PK models, i.e. reliability of  
16 the predicted VWF:Act and FVIII levels, defined as the difference between predicted and actual  
17 VWF:Act and FVIII levels achieved after dosing.  
18  
19  
20  
21  
22

23 12 Arm D (prophylactic treatment with a VWF-containing concentrate): predictive performance of  
24 the VWF-containing concentrate population PK models, i.e. reliability of the predicted VWF:Act  
25 and FVIII levels, defined as the difference between predicted and actual VWF:Act and FVIII  
26 levels achieved after dosing.  
27  
28  
29  
30  
31

### 32 17 **Secondary endpoints**

34 18 (Only in arm B, C and D): number and timing of desmopressin administrations (desmopressin  
35 dose will be standardized at 0.3 µg/kg) and/or timing and dosing of VWF-containing  
36 concentrate infusions.  
37  
38  
39

40 21 (Only in arm B, C and D): hemostasis quantified by: hemoglobin levels, blood loss (ml),  
41 incidence of bleeds, incidence of thrombosis, and need for blood transfusion and/or (re)-  
42 operation.  
43  
44

45 24 (Only in arm B & C): duration of hospitalization, clinical visit (days).

47 25 (Only in arm B, C and D): Feasibility of the intervention with regard to patient and physician  
48 satisfaction and economic impact.  
49

51 27 (Only in case of desmopressin testing or desmopressin treatment): desmopressin plasma  
52 concentrations.  
53  
54

55 29  
56  
57  
58  
59  
60

## 1 **Sample size**

2 In this prospective study, we will explore the predictive performance of the constructed  
3 population PK models for desmopressin and VWF-containing concentrates. In bleeding and  
4 surgery, we will aim for VWF:Act and FVIII target trough levels (defined as 100-125% of  
5 VWF:Act and FVIII target trough level as stated by the treating physician and according to the  
6 national guidelines).

7 It is not common practice to calculate a sample size for prognostic models, and to our  
8 knowledge it is not possible to calculate a sample size for the determination of predictive  
9 performance, our primary outcome. However, as characteristics such as age, sex and disease  
10 type are not part of the inclusion criteria or exclusion criteria, the study population will be a  
11 reflection of the heterogeneous 'real life' VWD and low VWF population. Consequently, this will  
12 increase the 'effective sample size' of our study population.

13 To be able to provide an estimation of the sample size needed, we have calculated  
14 sample sizes for outcomes that may be seen as surrogates for the primary outcome. Based on a  
15 random sample (n=100) of our retrospective cohort of patients whom underwent a  
16 desmopressin test, we have constructed an average VWF:Act-after-desmopressin curve with  
17 25% percentiles. In 81% of individual desmopressin tests, one or more time points fall outside  
18 of the 50% confidence interval of this average curve. Data from our retrospective cohort study  
19 on perioperative treatment with a VWF-containing concentrate (Haemate P®) show that in the  
20 total study population, 81% of FVIII trough levels in the first 36 hours was >0.20 IU/mL higher  
21 than targeted<sup>4</sup>. Using adaptive Bayesian dosing, we estimate that we can decrease the  
22 percentage in both groups from 81% to <50%. To determine this with an alpha of 0.02 and a  
23 power of 90%, we will have to include at least 25 patients in the desmopressin test group and  
24 at least 25 patients in the perioperative VWF-containing concentrate group. To allow for  
25 dropouts, at least 30 patients will be included in the desmopressin test group, and 30 patients  
26 will be included in the perioperative VWF-containing concentrate group. For desmopressin  
27 treatment during medical interventions, scarce data is available on factor levels during the  
28 periprocedural period. However, as we will also use the desmopressin test PK model in this  
29 setting, we assume similarity to the desmopressin test group and will also include 30 patients.

1 To explore the applicability of the currently available population PK models in other  
2 settings, predictive performance of the population PK models and PK-guided dose adjustments  
3 in groups for which no retrospective data is available, will be tested. Only small numbers of  
4 patients are currently treated with desmopressin in combination with VWF-containing  
5 concentrate, and it is expected that inclusion of patients with acute bleeding will be logistically  
6 challenging. Therefore, we aim for the inclusion of 10 patients who will receive a combination  
7 of desmopressin and VWF-containing concentrate during a medical intervention, 10 patients  
8 with a bleeding episode receiving treatment with desmopressin and 10 patients with a bleeding  
9 episode receiving treatment with VWF-containing concentrate. As very few patients in the  
10 Netherlands receive prophylaxis, we aim to include 3-5 patients in arm D. In these settings, the  
11 population PK models for treatment with desmopressin and VWF-containing concentrate will  
12 be combined, and we will extrapolate the perioperative PK models to bleeding and prophylaxis.

#### 14 **Data analysis plan**

##### 15 ***Primary study parameters***

16 Predictive performance of the population PK models, defined as difference between predicted  
17 and actual FVIII and VWF:Act levels achieved after dosing will be analyzed using Bland Altman  
18 analysis. Mean relative error (MRE) will be calculated to determine accuracy and root mean  
19 squared error (RMSE) will be calculated to determine precision.

##### 21 ***Secondary study parameters***

- 22 1. In case of perioperative treatment with VWF-containing concentrate (n = 30): concentrate  
23 consumption (IU/kg) from 24 hours before surgery until stop of VWF-containing  
24 concentrate infusions will be compared to consumption in the retrospective treatment  
25 cohort, of which the data have already been published. If patients underwent >1 surgical  
26 procedure, only the first one will be used for analysis. The distribution of outcomes for the  
27 prospectively studied group will be tested for normality using the Shapiro-Wilk test. In case  
28 of a non-significant (p >0.05) result of this test, the t-test will be used for the comparison of  
29 the primary endpoint. In case the resulting p-value for the Shapiro-Wilk test is equal or less

- 1  
2  
3 1 than 0.05 , the Wilcoxon-rank sum test will be used. The level for significance for this  
4  
5 2 analysis will be set at two-sided  $p < 0.05$ . Number and timing of desmopressin infusions will  
6  
7 3 be defined quantitatively.  
8  
9 4 2. In the perioperative group, hemostasis will be quantified by amount of blood loss (mL).  
10  
11 5 Bleeding complications or thrombotic complications will be defined quantitatively.  
12  
13 6 3. In the perioperative group, duration of hospitalization (days) will be defined quantitatively.  
14  
15 7 4. Feasibility of the intervention: patient and physician satisfaction during PK-guided  
16  
17 8 treatment during surgery and bleeding will be measured using a 10-point VAS (visual-  
18  
19 9 analogue scale) questionnaire and will be defined quantitatively. Economic evaluation will  
20  
21 10 be performed from a health care perspective taking all health care costs into account.  
22  
23 11 5. To test the correlation between desmopressin concentrations and relative increase in FVIII  
24  
25 12 and VWF levels during desmopressin tests, and during desmopressin treatment during  
26  
27 13 surgery or bleeding, the Pearson correlation coefficient will be calculated.  
28  
29  
30

### 31 **Patient and public involvement**

32 During development of all OPTI-CLOT studies, we work closely together with The Netherlands  
33  
34 17 Hemophilia Patient Society (NVHP). A member of the NVHP is also a member of the OPTI-CLOT  
35  
36 18 study group and plays an advisory role in developing the studies within the consortium. The  
37  
38 19 final results of the study will be communicated through international scientific journals and at  
39  
40 20 international conferences. In addition, a layman summary of the results of this study will be  
41  
42 21 published in the NVHP magazine. Lastly, the results of the study will be implemented in  
43  
44 22 treatment guidelines and patient information will be adjusted accordingly.  
45  
46

### 47 **Ethics and dissemination**

48 25 The trial protocol was approved by the Medical Ethics Committee of the Erasmus MC,  
49  
50 26 University Medical Center Rotterdam, the Netherlands. The study will be conducted according  
51  
52 27 to good clinical practice (GCP) guidelines and the Declaration of Helsinki, and in accordance  
53  
54 28 with the Dutch Medical Research Involving Humans Act (WMO). Written informed consent will  
55  
56 29 be obtained from all participants by the investigator. Also, see online supplementary data for  
57  
58  
59  
60



1  
2  
3 1 our regulations for data storage, amendments and compensation for injury. Results of the study  
4 will be communicated to the (inter)national medical and scientific community through  
5 publication in high-ranking peer-reviewed international journals and at (inter)national  
6 conferences. Results of the study will be implemented in the Dutch Haemophilia Treatment  
7 Guidelines and may also be adopted by international Haemophilia Treatment Societies.  
8  
9  
10  
11  
12  
13

#### 14 7 **Data monitoring committee and serious adverse events**

15  
16 8 Safety risks for participants are minimal as the VWF-containing concentrates and desmopressin  
17 used in this study are registered therapeutics for treatment of von Willebrand disease. To  
18 guarantee safety for participants in this study, VWF and FVIII levels will be monitored closely to  
19 prevent any additional bleeding risk. Therefore, a data safety monitoring board is not needed.  
20  
21 10 Serious adverse events (SAE) will be communicated to the sponsor within 24 hours. The  
22 sponsor will register the SAE within 15 days on ToetsingOnline, the Dutch registration system  
23 for SAEs.  
24  
25  
26  
27  
28  
29  
30

#### 31 16 **REGISTRATION**

32  
33 17 The trial is registered at the Netherlands Trial Register, number NL7212  
34 ([www.trialregister.nl/trial/7212](http://www.trialregister.nl/trial/7212)) and to EudraCT with number 2018-001631-46.  
35  
36  
37

#### 38 20 **CONCLUSION**

39  
40 21 In the OPTI-CLOT: To WiN trial, we will investigate the reliability and feasibility of  
41 pharmacokinetic-guided dosing of desmopressin and VWF-containing concentrates in  
42 individuals with VWD and low VWF, undergoing a medical intervention, during a bleeding  
43 episode, or during prophylactic treatment.  
44  
45  
46  
47  
48

#### 49 26 **ACKNOWLEDGEMENTS**

50  
51 27 The authors would like to thank all patients, physicians and (research) nurses participating in  
52 the study, and the OPTI-CLOT research group for their support.  
53  
54  
55  
56  
57  
58  
59  
60

## 1 **FUNDING STATEMENT**

2 This investigator-initiated research project was supported by the Innovation Fund of Health  
3 Care Insurance Companies (Innovatiefonds Zorgverzekeraars) in the Netherlands (project  
4 number 3216). The funder is not involved in the design or performance of the study and does  
5 not get any benefits from the study.

## 6 **AUTHOR STATEMENT**

7 JH, RM and MHC designed the study. WAA, NdJ, LB, CZ and FL provided critical guidance during  
8 the design of the study. JH wrote the manuscript. All authors have read and approved the final  
9 manuscript.

## 10 **COMPETING INTERESTS STATEMENT**

11 JH has received an award from CSL Behring outside the submitted work. CZ had received  
12 research grants from Pfizer, Celgene, Daiichi-Sankyo and is a consultant for Incyte, Sanofi and  
13 Pfizer. FL has received unrestricted research grants from CSL Behring, Takeda and uniQure, and  
14 is consultant for Takeda, uniQure, and Biomarin. He is DSMB member for a study sponsored by  
15 Roche. RM has received travel grants from Shire and Bayer. MC has received grants from  
16 governmental research institutes such as NWO, ZonMW, Innovation fund, institutional grants  
17 and unrestricted investigator research grants/educational and travel funding from the following  
18 companies over the years: Pfizer, Baxter/Baxalta/Shire, Bayer Schering Pharma, CSL Behring,  
19 Sobi Biogen, Novo Nordisk, Novartis and Nordic Pharma, and has served as a member on  
20 steering boards of Roche, Bayer and Octapharma. The remaining authors declare no competing  
21 financial interests. All unrestricted research grants, awards, educational grants and consultancy  
22 fees of all authors were forwarded to the respective institutions.

## 23 **THE OPTI-CLOT STUDY GROUP**

24 Steering Committee, the Netherlands: M.H. Cnossen (principal Investigator and chair OPTI-  
25 CLOT), F.W.G. Leebeek, Rotterdam; K. Fijnvandraat, R.A.A. Mathôt (co-investigator),  
26 Amsterdam; K. Meijer, Groningen. Local principal investigators, other local collaborators the

1  
2  
3 1 Netherlands: M.J.H.A. Kruij, S. Polinder, Rotterdam; M. Coppens, Amsterdam; R.Y.J. Tamminga,  
4 K. Meijer, Groningen; B.A.P. Laros-van Gorkom, P. Brons, S.E.M. Schols, Nijmegen; F.J.M. van  
5 der Meer, H.C.J. Eikenboom, Leiden; R.E.G. Schutgens, K. Fischer, Utrecht; F. Heubel-Moenen,  
6 Maastricht; L. Nieuwenhuizen, Veldhoven; P. Ypma, The Hague; M.H.E. Driessens, Nijkerk. Trial  
7 bureau: C. M. Zwaan, I. van Vliet, Rotterdam. Principal investigators and local collaborators in  
8 the United Kingdom: P. W. Collins, Cardiff; R. Liesner, P. Chowdary, London; D. Keeling, Oxford.  
9 OPTI-CLOT PhDs: J. Lock, H.C.A.M. Hazendonk, I. van Moort, T. Preijers, J.M. Heijdra, N.C.B. de  
10 Jager, M.C.H.J. Goedhart, L.H. Bukkems, W. Al Arashi, M.E. Cloesmeijer, A. Janssen.  
11  
12  
13  
14  
15  
16  
17  
18  
19

## 20 REFERENCES

- 21 1. Leebeek FW, Eikenboom JC. Von Willebrand's Disease. *N Engl J Med* 2016;**375**(21):2067-80.
- 22 2. Sadler JE, Budde U, Eikenboom JCJ, et al. Update on the pathophysiology and classification of  
23 von Willebrand disease: A report of the Subcommittee on von Willebrand factor. *J*  
24 *Thromb Haemost* 2006;**4**(10):2103-14.
- 25 3. Lavin M, Aguila S, Schneppenheim S, et al. Novel insights into the clinical phenotype and  
26 pathophysiology underlying low VWF levels. *Blood* 2017;**130**(21):2344-53.
- 27 4. Hazendonk HCAM, Heijdra JM, de Jager NCB, et al. Analysis of current perioperative  
28 management with Haemate((R)) P/Humate P((R)) in von Willebrand disease: Identifying  
29 the need for personalized treatment. *Haemophilia* 2018.
- 30 5. Heijdra JM, Cnossen MH, Leebeek FWG. Current and Emerging Options for the Management  
31 of Inherited von Willebrand Disease. *Drugs* 2017.
- 32 6. Castaman G, Lethagen S, Federici AB, et al. Response to desmopressin is influenced by the  
33 genotype and phenotype in type 1 von Willebrand disease (VWD): Results from the  
34 European Study MCMDM-1VWD. *Blood* 2008;**111**(7):3531-39.
- 35 7. Federici AB, Mazurier C, Berntorp E, et al. Biologic response to desmopressin in patients with  
36 severe type 1 and type 2 von Willebrand disease: Results of a multicenter European  
37 study. *Blood* 2004;**103**(6):2032-38.
- 38 8. Lethagen S, Kyrle PA, Castaman G, et al. von Willebrand factor/factor VIII concentrate  
39 (Haemate® P) dosing based on pharmacokinetics: A prospective multicenter trial in  
40 elective surgery. *J Thromb Haemost* 2007;**5**(7):1420-30.
- 41 9. de Jager NCB, Bukkems LH, Heijdra JM, et al. One piece of the puzzle: Population  
42 pharmacokinetics of FVIII during perioperative Haemate P((R)) /Humate P((R))  
43 treatment in von Willebrand disease patients. *J Thromb Haemost* 2020;**18**(2):295-305.
- 44 10. de Jager NCB, Heijdra JM, Kieboom Q, et al. Population Pharmacokinetic Modeling of von  
45 Willebrand Factor Activity in von Willebrand Disease Patients after Desmopressin  
46 Administration. *Thromb Haemost* 2020;**120**(10):1407-16.
- 47 11. De Wee EM, Leebeek FWG, Eikenboom JCJ. Diagnosis and management of von Willebrand  
48 Disease in the Netherlands. *Semin Thromb Hemost* 2011;**37**(5):480-87.
- 49  
50  
51  
52  
53  
54  
55  
56  
57  
58  
59  
60

## Note from the Editors: Instructions for reviewers of study protocols

---

Since launching in 2011, BMJ Open has published study protocols for planned or ongoing research studies. If data collection is complete, we will not consider the manuscript.

Publishing study protocols enables researchers and funding bodies to stay up to date in their fields by providing exposure to research activity that may not otherwise be widely publicised. This can help prevent unnecessary duplication of work and will hopefully enable collaboration. Publishing protocols in full also makes available more information than is currently required by trial registries and increases transparency, making it easier for others (editors, reviewers and readers) to see and understand any deviations from the protocol that occur during the conduct of the study.

The scientific integrity and the credibility of the study data depend substantially on the study design and methodology, which is why the study protocol requires a thorough peer-review.

*BMJ Open* will consider for publication protocols for any study design, including observational studies and systematic reviews.

Some things to keep in mind when reviewing the study protocol:

- Protocol papers should report planned or ongoing studies. The dates of the study should be included in the manuscript.
- Unfortunately we are unable to customize the reviewer report form for study protocols. As such, some of the items (i.e., those pertaining to results) on the form should be scored as Not Applicable (N/A).
- While some baseline data can be presented, there should be no results or conclusions present in the study protocol.
- For studies that are ongoing, it is generally the case that very few changes can be made to the methodology. As such, requests for revisions are generally clarifications for the rationale or details relating to the methods. If there is a major flaw in the study that would prevent a sound interpretation of the data, we would expect the study protocol to be rejected.

**Supplementary data**

1. Steering committee
2. List of participating centers and principal investigators
3. Monitoring and safety assurance
4. Handling and storage of data and documents
5. Amendments
6. Compensation for injury
7. Access to final trial dataset
8. Model for patient information and informed consent form (Dutch only).

## 1. Steering committee

### Coordinating investigator / project leader:

Dr. M.H. Cnossen, Pediatric Hematologist

Department of Pediatric Hematology, Erasmus MC – Sophia Children’s Hospital, University Medical Center Rotterdam, Rotterdam, the Netherlands

Email: [m.cnossen@erasmusmc.nl](mailto:m.cnossen@erasmusmc.nl)

### Co-project leader:

Prof. Dr. R.A.A. Mathôt, Hospital Pharmacist – Clinical Pharmacologist

Hospital Pharmacy – Clinical Pharmacology, Amsterdam UMC, University of Amsterdam, Amsterdam, the Netherlands

[r.mathot@amsterdamumc.nl](mailto:r.mathot@amsterdamumc.nl)

### Principal investigators:

See 2. List of participating centers and principal investigators

### Sponsor:

Prof. Dr. E.H.H.M. Rings, Head of Department of Pediatrics,

Erasmus MC- Sophia Children’s Hospital, University Medical Center Rotterdam, Rotterdam, the Netherlands

[e.rings@erasmusmc.nl](mailto:e.rings@erasmusmc.nl)

## 2. List of Participating Centers

Erasmus MC, University Medical Center Rotterdam, Rotterdam, the Netherlands

PI: Dr. M.H. Cnossen ([m.cnossen@erasmusmc.nl](mailto:m.cnossen@erasmusmc.nl))

Radboud University Medical Center, Nijmegen, the Netherlands

PI: Dr. S.E.M. Schols ([saskia.schols@radboudumc.nl](mailto:saskia.schols@radboudumc.nl))

University Medical Center Groningen, Groningen, the Netherlands

PI: Prof. Dr. K. Meijer ([k.meijer@umcg.nl](mailto:k.meijer@umcg.nl))

Amsterdam University Medical Center, Amsterdam, the Netherlands

PI: Prof. Dr. C.J. Fijnvandraat ([c.j.fijnvandraat@erasmusmc.nl](mailto:c.j.fijnvandraat@erasmusmc.nl))

Maastricht University Medical Center, Maastricht, the Netherlands

PI: Drs. F. Heubel-Moenen ([floor.moenen@mumc.nl](mailto:floor.moenen@mumc.nl))

Haga Hospital, The Hague, the Netherlands

PI: Dr. P. Ypma ([p.ypma@hagaziekenhuis.nl](mailto:p.ypma@hagaziekenhuis.nl))

Maxima Medical Center, Veldhoven, the Netherlands

PI: Dr. L. van Nieuwenhuizen ([laurens.nieuwenhuizen@mmc.nl](mailto:laurens.nieuwenhuizen@mmc.nl))

### 3. Handling and storage of data and documents

All data will be handled confidentially and will be filed in a coded database. A study number will be appointed to every patient. Individual patients can only be identified by participating investigators at the different sites by this number in combination with their hospital registration number. Handling of data will be done according to the Dutch Personal Data Protection Act. Blood samples will be handled confidentially and will be stored in the hemostasis laboratory in the Erasmus MC. Within a few weeks after discharge of a patient, a member of the study team will make an appointment to collect the blood samples. The samples will be stored for 15 years (and returned to the site, if demanded so by specific site-regulations).



#### 4. Monitoring and quality assurance

The risk for participating patients is minimal. Daily monitoring of plasma levels and subsequent adjustment of VWF-containing concentrate dosing according to the Dutch Hemophilia Consensus target levels, will ensure adequate FVIII and VWF levels to prevent bleeding. By following the Consensus, this therapeutic study poses no additional risk to the patients. Safety and quality of the study will be monitored once yearly at every participating site by an auditor independent from the sponsor and investigators.

For peer review only

## 5. Amendments

Amendments are changes made to the research after a favourable opinion by the accredited METC has been given. All amendments will be notified to the METC that gave a favourable opinion.

A 'substantial amendment' is defined as an amendment to the terms of the METC application, or to the protocol or any other supporting documentation, that is likely to affect to a significant degree:

- the safety or physical or mental integrity of the subjects of the trial;
- the scientific value of the trial;
- the conduct or management of the trial; or
- the quality or safety of any intervention used in the trial.

All substantial amendments will be notified to the METC and to the competent authority.

Non-substantial amendments will not be notified to the accredited METC and the competent authority, but will be recorded and filed by the sponsor.

All amendments will be communicated to all participating centers by the trial coordinator.

Changes regarding inclusion and exclusion criteria or study design, will also be communicated to [www.trialregister.nl](http://www.trialregister.nl) (NL7212).

## 6. Compensation for injury

The sponsor/investigator has a liability insurance which is in accordance with article 7, subsection 9 of the WMO. The sponsor/investigator has a liability insurance which is in accordance with article 7 of the WMO. The sponsor (also) has an insurance which is in accordance with the legal requirements in the Netherlands (Article 7 WMO). This insurance provides cover for damage to research subjects through injury or death caused by the study. The insurance applies to the damage that becomes apparent during the study or within 4 years after the end of the study.

For peer review only

## 7. Access to final trial dataset

The sponsor of the OPTI-CLOT: To WiN study will have access to the final dataset and will be the owner of all study data. However, all participating centers have access to their own data and will have permission to use these data for non-commercial research within their own center and to improve patient care. All publications regarding the OPTI-CLOT: To WiN study will be coordinated by the project leader. Other centers than the sponsor site may only publish data after permission from the sponsor and if the sponsor is not publishing the data within a fair amount of time after the study and data analysis has ended. All participating centers have contractual agreements with the sponsor regarding these matters.

## 8. Model for patient information and informed consent form.

# Proefpersoneninformatie voor deelname aan medisch-wetenschappelijk onderzoek

### **Onderzoek naar de effecten van farmacokinetische modellen bij het doseren DDAVP en/of stollingsfactorconcentraten bij patiënten met de ziekte van von Willebrand bij medische interventies**

---

Officiële titel: Implementatie van farmacokinetisch gestuurd doseren van DDAVP en VWF-bevattende stollingsfactorconcentraten bij von Willebrandziekte ("OPTI-CLOT: To-WiN")

#### **Informatie voor een patiënt met de ziekte van von Willebrand (≥16 jaar)**

Geachte heer/mevrouw,

Wij vragen u om mee te doen aan een medisch-wetenschappelijk onderzoek.

Meedoen is vrijwillig. Om mee te doen is wel uw schriftelijke toestemming nodig. U ontvangt deze brief omdat u de ziekte van Von Willebrand heeft en u binnenkort een ingreep ondergaat.

Voordat u beslist of u wilt meedoen aan dit onderzoek, krijgt u uitleg over wat het onderzoek inhoudt. Lees deze informatie rustig door en vraag de onderzoeker uitleg als u vragen heeft. U kunt ook de onafhankelijk deskundige, die aan het eind van deze brief genoemd wordt, om aanvullende informatie vragen. U kunt er ook over praten met uw partner, vrienden of familie.

Verdere informatie over meedoen aan zo'n onderzoek staat op de website van de Rijksoverheid: [www.rijksoverheid.nl/mensenonderzoek](http://www.rijksoverheid.nl/mensenonderzoek).

#### **Algemene informatie**

Dit onderzoek is opgezet door het Erasmus MC en wordt gedaan door artsen in verschillende ziekenhuizen in Nederland. Er zullen naar verwachting 120 proefpersonen meedoen; zowel volwassenen als kinderen van alle leeftijden. De medisch-ethische toetsingscommissie heeft dit onderzoek goedgekeurd. Algemene informatie over de toetsing van onderzoek vindt u op de website van de Rijksoverheid: [www.rijksoverheid.nl/mensenonderzoek](http://www.rijksoverheid.nl/mensenonderzoek).

#### **1. Doel van het onderzoek**

Het doel van dit onderzoek is uitzoeken of een nieuwe manier van doseren (doseren op basis van farmacokinetische modellen, ook wel PK-modellen genoemd) van DDAVP en/of stollingsfactorconcentraat toepasbaar is in de praktijk. Deze PK-modellen zullen daarom onderzocht worden in verschillende situaties: tijdens DDAVP-testen, bij de behandeling van bloedingen, en bij de

1  
2  
3 behandeling rondom medische ingrepen (zoals operatie, tandheelkundig ingreep, kijkonderzoek van  
4 darm en bevalling in het ziekenhuis).

## 6 7 **2. Achtergrond van het onderzoek**

8  
9 Patiënten met de ziekte van Von Willebrand worden rondom medische ingrepen behandeld met DDAVP  
10 en/of een stollingsfactorconcentraat. Deze medicatie wordt tot nu toe op grond van het  
11 lichaamsgewicht gedoseerd. Echter, de medicatie gedraagt zich bij elke persoon verschillend. Dit wordt  
12 grotendeels bepaald door hoe het lichaam met het medicijn omgaat. Dit wordt “farmacokinetiek” (PK)  
13 genoemd. Op basis van gegevens van patiënten die eerder met deze medicatie zijn behandeld, zijn PK-  
14 modellen gemaakt. Met deze modellen is het mogelijk geworden om een beter inzicht te krijgen in hoe  
15 het lichaam van verschillende patiënten met het medicijn om zal gaan. In de toekomst kunnen wij  
16 hiermee per persoon voorspellen hoe vaak en in welke dosering de medicatie gegeven moet worden.  
17 Hiermee voorkomen we dat we óf te weinig, óf te veel medicatie geven.

## 21 22 **3. Wat meedoen inhoudt**

23 Als u meedoet, duurt dat totaal enkele dagen tot weken voor u, afhankelijk van het soort behandeling.

### 25 26 **Behandeling**

27 Rondom de ingreep die u zult ondergaan, wordt u behandeld met DDAVP en/of  
28 stollingsfactorconcentraat. De keuze voor het soort medicatie wordt bepaald door uw behandelend arts  
29 (hematoloog) en is hetzelfde als wanneer u niet zou meedoen aan het onderzoek. Als u meedoet aan  
30 het onderzoek zal op een andere, specifiekere manier bepaald worden hoeveel van het medicijn u krijgt  
31 en hoe vaak. In dit onderzoek zal dit worden berekend op basis van uw persoonlijke gegevens en uw  
32 persoonlijke PK-profiel, gecombineerd met het algemene PK-model. Dit verschilt van de normale  
33 situatie, waarin de dosis op basis van uw lichaamsgewicht wordt bepaald.

37 Omdat de ingreep die u zult ondergaan pas over enige tijd zal plaatsvinden, geeft dit gelegenheid om bij  
38 u van tevoren een persoonlijk PK-profiel op te stellen. Hierbij worden als u behandeld wordt met  
39 DDAVP, indien mogelijk, de gegevens van een eerdere DDAVP-test gebruikt. U hoeft dan niet extra naar  
40 het ziekenhuis te komen. In de andere gevallen (als u geen bruikbare DDAVP test heeft en behandeling  
41 met DDAVP moet ondergaan, of als u een behandeling met stollingsfactorconcentraat gaat krijgen)  
42 willen wij graag een testdosis van de medicatie toedienen en op meerdere momenten bloed bij u  
43 afnemen om het persoonlijke PK-profiel te maken.

### 47 48 **Bezoeken en metingen**

49 Naast de gebruikelijke handelingen die worden gedaan ter voorkoming van een bloeding rondom de  
50 ingreep, zult u in het kader van het onderzoek eenmalig gewogen worden, en er wordt een “lean body  
51 mass” meting gedaan (meting van de vetvrije massa van het lichaam).

1  
2  
3 Er wordt extra bloed afgenomen om de hoeveelheid stollingsfactoren in uw bloed te bepalen en  
4 mogelijk krijgt u een testdosis DDAVP en/of stollingsfactorconcentraat toegediend. Het kan zijn dat u  
5 hiervoor extra naar het ziekenhuis moet komen.  
6

7  
8 Voor een schematisch overzicht van de onderzoekshandelingen, zie **bijlage C**: overzicht  
9 onderzoekshandelingen.  
10

#### 11 **4. Wat wordt er van u verwacht**

  
12

13 Om het onderzoek goed te laten verlopen, is het belangrijk dat u zich aan de volgende afspraken houdt.  
14

15 De afspraken zijn dat u:

- 16 - niet ook nog aan een ander medisch-wetenschappelijk onderzoek meedoet.
- 17 - afspraken voor bezoeken nakomt.  
18  
19  
20

21 Het is belangrijk dat u contact opneemt met de onderzoeker:

- 22 - voordat u andere geneesmiddelen gaat gebruiken. Ook als dat homeopathische  
23 geneesmiddelen, natuurgeneesmiddelen, vitaminen en/of geneesmiddelen van de drogist zijn.
- 24 - als u in een ziekenhuis wordt opgenomen of behandeld.
- 25 - u plotseling gezondheidsklachten krijgt.
- 26 - u een bloeding krijgt na de ingreep.
- 27 - u niet meer wilt meedoen aan het onderzoek.
- 28 - als uw contactgegevens wijzigen.  
29  
30  
31  
32

#### 33 **Zwangerschap**

  
34

35 Bent u zwanger, of wordt u zwanger tijdens het onderzoek? Laat dit dan direct weten aan uw behandeld  
36 arts. Hij/zij zal dan beslissen of uw behandeling moet worden aangepast.  
37

#### 38 **5. Mogelijke bijwerkingen/complicaties en ongemakken**

  
39

40 Het geneesmiddel dat u tijdens het onderzoek krijgt, is hetzelfde middel als dat u krijgt als u niet  
41 meedoet aan het onderzoek. Er zijn daarom geen andere bijwerkingen te verwachten dan tijdens de  
42 standaard behandeling rondom een ingreep.  
43  
44

#### 45 **Metingen**

  
46

47 Bij de eenmalige "lean body mass" meting ligt u op de onderzoeksbank, waarna er een sticker met  
48 elektrode op uw hand en voet geplakt wordt. Op deze elektroden wordt een apparaatje aangesloten,  
49 waarop de onderzoeker de gegevens over uw lichaamssamenstelling kan aflezen. Dit onderzoek is niet  
50 pijnlijk.  
51  
52

53 Bloedafnames kunnen pijn doen of een bloeditstorting geven. Alles bij elkaar nemen we, afhankelijk  
54 van welk geneesmiddel u krijgt, tussen de 60 en 80 ml extra bloed bij u af. Deze hoeveelheid geeft geen  
55 problemen. Ter vergelijking: bij de bloedbank wordt 500 ml per keer afgenomen.  
56  
57  
58  
59  
60

## 6. Mogelijke voor- en nadelen

Het is belangrijk dat u de mogelijk voor- en nadelen goed afweegt voordat u besluit mee te doen.

U heeft zelf geen direct voordeel van dit onderzoek. Voor de toekomst kan het onderzoek wel nuttige gegevens opleveren. Mogelijk krijgt u door mee te doen aan het onderzoek een dosering van het geneesmiddel die beter bij uw lichaam past, waardoor wordt voorkomen dat er te veel of te weinig wordt gegeven rondom een ingreep. Dit kan een voordeel opleveren. Zoals gebruikelijk worden de waarden van de stollingsfactoren in uw bloed nauwkeurig gecontroleerd, waardoor u geen gevaar loopt en de behandelaar steeds op de hoogte is of u voldoende van het geneesmiddel krijgt toegediend om bloedingen te voorkomen. Wanneer wij besluiten om bij elke patiënt in de toekomst een farmacokinetisch model te maken voor de ingreep, kunnen we de in dit onderzoek verzamelde gegevens mogelijk in de toekomst voor uw behandeling gebruiken en hoeft u dan niet extra te worden geprikt. Dit kan ook een voordeel zijn.

Nadelen van meedoen aan het onderzoek kunnen zijn:

- mogelijke ongemakken van de metingen in het onderzoek (zie punt 5)

Deelname aan het onderzoek betekent ook:

- dat u extra tijd kwijt bent;
- extra bloedafnames;
- dat u mogelijk meerdere keren extra naar het ziekenhuis moet komen;
- dat u afspraken heeft waaraan u zich moet houden

Al deze zaken zijn hiervoor onder punt 3, 4 en 5 beschreven.

## 7. Als u niet wilt meedoen of wilt stoppen met het onderzoek

U beslist zelf of u meedoet aan het onderzoek. Deelname is vrijwillig. Als u niet wilt meedoen, wordt u rondom de ingreep op de gebruikelijke manier behandeld voor uw von Willebrandziekte, en de geneesmiddelen zullen op de gebruikelijke manier gedoseerd worden. De onderzoeker kan u meer vertellen over de behandelingsmogelijkheden die er zijn en de voor- en nadelen daarvan.

Als u wel meedoet, kunt u zich altijd bedenken en toch stoppen, ook tijdens het onderzoek. U wordt dan weer op de gebruikelijke manier behandeld voor uw von Willebrandziekte. U hoeft niet te zeggen waarom u stopt. Wel moet u dit direct melden aan de onderzoeker. De gegevens die tot dat moment zijn verzameld, worden gebruikt voor onderzoek. Als u wilt, kan verzameld lichaamsmateriaal worden vernietigd.

Als er nieuwe informatie over het onderzoek is die belangrijk voor u is, laat de behandelend arts dit aan u weten. U wordt dan gevraagd of uw blijft meedoen.



## 8. Einde van het onderzoek

Uw deelname aan het onderzoek stopt als

- alle bezoeken en bloedafnames volgens het schema voorbij zijn
- u zelf kiest om te stoppen
- de onderzoeker het beter voor u vindt om te stoppen
- de overheid of de beoordelende medisch-ethische toetsingscommissie besluit om het onderzoek te stoppen

Het hele onderzoek is afgelopen als alle deelnemers klaar zijn. Na het verwerken van alle gegevens informeert de onderzoeker u over de belangrijkste uitkomsten van het onderzoek.

## 9. Gebruik en bewaren van uw gegevens en lichaamsmateriaal

Voor dit onderzoek worden uw persoonsgegevens en lichaamsmateriaal verzameld, gebruikt en bewaard. Het gaat om gegevens zoals naam, adres, geboortedatum en om gegevens over uw gezondheid. Het gaat bij dit onderzoek om uitslagen van bloed. Gebruik en bewaring van uw gegevens en lichaamsmateriaal is nodig om de wetenschappelijke vraagstelling van dit onderzoek te kunnen beantwoorden en over de resultaten te publiceren. U wordt gevraagd om hiervoor toestemming te geven. Als u dat niet wilt, kunt u niet deelnemen aan dit onderzoek.

### Vertrouwelijkheid van uw gegevens en lichaamsmateriaal

Om uw privacy te beschermen, worden uw gegevens en het lichaamsmateriaal voorzien van een code. De naam en andere gegevens die u direct kunnen identificeren worden apart bewaard. Alleen met de sleutel van de code zijn gegevens tot u te herleiden. De sleutel van de code blijft bij de onderzoeker. Naar de sponsor/opdrachtgever en andere bij het onderzoek betrokken partijen worden uw gegevens en lichaamsmateriaal alleen onder die code verstuurd. Ook in rapporten en publicaties over het onderzoek worden alleen de gecodeerde gegevens van u vermeld.

### Controle en inzage in uw gegevens

Sommige personen en instanties moeten inzage kunnen hebben in al uw gegevens. Ook in de gegevens zonder code. Dit is nodig om te kunnen controleren of het onderzoek goed en betrouwbaar is uitgevoerd. Personen en instanties die ter controle toegang krijgen tot uw gegevens: medewerkers van het onderzoeksteam, de veiligheidscommissie die het onderzoek in de gaten houdt, een controleur die door de opdrachtgever van het onderzoek is ingehuurd, nationale en internationale toezichthoudende autoriteiten, bijvoorbeeld de Inspectie Gezondheidszorg en Jeugd.

Zij zullen uw gegevens geheim houden. U wordt gevraagd voor deze inzage toestemming te geven. Indien u dat niet wilt, kunt u niet deelnemen aan dit onderzoek.

### **Bewaartermijn gegevens en lichaamsmateriaal**

Op de onderzoekslocatie (het ziekenhuis) en bij de opdrachtgever worden uw gegevens gedurende de wettelijk voorgeschreven termijn bewaard, de wettelijk voorgeschreven termijn is 15 jaar.

Het van u verkregen lichaamsmateriaal wordt niet onmiddellijk na analyse vernietigd. Uw lichaamsmateriaal wordt bewaard om in de loop van dit onderzoek daarop nog nieuwe analyses/bepalingen te kunnen doen.

### **Bewaring en gebruik van gegevens en lichaamsmateriaal voor ander onderzoek**

Na afloop van dit onderzoek kunnen uw gegevens en lichaamsmateriaal nog van belang zijn voor het uitvoeren van ander onderzoek. U wordt gevraagd toestemming te geven voor dit langer bewaren en voor gebruik in ander, toekomstig, onderzoek op het gebied van uw aandoening. Indien u dat niet wilt, kunt u gewoon deelnemen aan het huidige onderzoek.

### **Informatie over onverwachte bevindingen**

Tijdens dit onderzoek kan er bij toeval iets gevonden worden dat niet van belang is voor het onderzoek maar wel voor u. Als dit belangrijk is voor uw gezondheid, dan zal je op de hoogte worden gesteld door de onderzoeker. U kunt dan met de behandelend arts bespreken wat er gedaan moet worden. Ook hiervoor geeft u toestemming.

### **Intrekken toestemming**

U kunt uw toestemming altijd weer intrekken, voor wat betreft dit onderzoek en voor wat betreft het toekomstig onderzoek. De reeds over u verzamelde gegevens zullen dan nog wel worden gebruikt in het onderzoek. Uw lichaamsmateriaal zal na intrekking van uw toestemming worden vernietigd. Als er al metingen in dat lichaamsmateriaal zijn gedaan, dan worden de resultaten nog wel gebruikt in het onderzoek. Indien u wilt dat al de gegevens over u worden verwijderd, dan kunt u daarom verzoeken.

### **Meer informatie over de rechten bij verwerking van gegevens**

Voor meer informatie over de naleving van uw rechten bij de verwerking van uw persoonsgegevens kunt u contact opnemen met de verantwoordelijke voor de verwerking van jouw persoonsgegevens. Voor dit onderzoek is het Erasmus MC is verantwoordelijk voor de naleving van de regels voor de verwerking van uw persoonsgegevens.

Bij vragen of klachten over de verwerking van uw persoonsgegevens raden we u aan eerst contact op te nemen met de onderzoekslocatie. U kunt ook contact opnemen met de Functionaris voor de Gegevensbescherming van de instelling of de Autoriteit Persoonsgegevens. Voor contactgegevens zie bijlage A.

Meer informatie over uw rechten bij de verwerking van uw persoonsgegevens kunt u vinden op de website van de Autoriteit Persoonsgegevens:

1  
2  
3 ([https://autoriteitpersoonsgegevens.nl/nl/onderwerpen/avg-nieuweeuropese-](https://autoriteitpersoonsgegevens.nl/nl/onderwerpen/avg-nieuweeuropese-privacywetgeving/controle-over-je-data)  
4 [privacywetgeving/controle-over-je-data](https://autoriteitpersoonsgegevens.nl/nl/onderwerpen/avg-nieuweeuropese-privacywetgeving/controle-over-je-data)).  
5

## 6 **Registratie van het onderzoek**

7  
8 Dit onderzoek staat ook in een overzicht van medisch-wetenschappelijke onderzoeken, namelijk op  
9  
10 [www.trialregister.nl](http://www.trialregister.nl). Deze website bevat geen informatie die herleidbaar is tot u als persoon. Wel kan  
11 de website een samenvatting van de resultaten van dit onderzoek tonen. U vindt dit onderzoek onder  
12 "OPTI-CLOT: To WiN".  
13  
14

## 15 **10. Verzekering voor proefpersonen**

16  
17 Voor iedereen die meedoet aan dit onderzoek is een verzekering afgesloten. De verzekering dekt schade  
18 door het onderzoek. Niet alle schade is gedekt. In **bijlage B** vindt u meer informatie over de verzekering.  
19 Daar staat ook aan wie u schade kunt melden.  
20  
21

## 22 **11. Vergoeding voor meedoen**

23  
24 De extra testen en ziekenhuisbezoeken voor het onderzoek kosten u niets. U wordt niet betaald voor  
25 het meedoen aan dit onderzoek. Wel krijgt u een vergoeding voor de reis- en parkeerkosten als u naar  
26 het ziekenhuis komt voor het maken van een PK-profiel.  
27  
28

## 29 **12. Heeft u vragen?**

30  
31 Bij vragen kunt u contact opnemen met de onderzoeker of uw behandeld arts. Voor onafhankelijk advies  
32 over meedoen aan dit onderzoek kunt u terecht bij de onafhankelijke arts. Hij weet veel over het  
33 onderzoek, maar heeft niet te maken met dit onderzoek.  
34  
35

36  
37 Bij klachten kunt u het beste terecht bij de klachtenfunctionaris/-commissie van uw ziekenhuis. Alle  
38 gegevens vindt u in **bijlage A**: Contactgegevens.  
39

## 40 **13. Ondertekening toestemmingsformulier**

41  
42 Wanneer u voldoende bedenktijd heeft gehad, wordt u gevraagd te beslissen over deelname aan dit  
43 onderzoek. Indien u toestemming geeft, zullen wij u vragen deze op de bijbehorende  
44 toestemmingsverklaring schriftelijk te bevestigen. Door uw schriftelijke toestemming geeft u aan dat u  
45 de informatie heeft begrepen en instemt met deelname aan het onderzoek. Het handtekeningenblad  
46 wordt door de onderzoeker bewaard. U krijgt een kopie of een tweede exemplaar van deze  
47 toestemmingsverklaring.  
48  
49

50  
51  
52  
53 Met vriendelijke groet,

54  
55 De "OPTI-CLOT: To-WiN" onderzoeksgroep  
56  
57  
58  
59

1  
2  
3 **14. Bijlagen bij deze informatie**  
4

5 A. Contactgegevens  
6

7 B. Informatie over de verzekering  
8

9 C. Schema onderzoekshandelingen  
10

11 D. Toestemmingsformulier  
12  
13  
14  
15  
16  
17  
18  
19  
20  
21  
22  
23  
24  
25  
26  
27  
28  
29  
30  
31  
32  
33  
34  
35  
36  
37  
38  
39  
40  
41  
42  
43  
44  
45  
46  
47  
48  
49  
50  
51  
52  
53  
54  
55  
56  
57  
58  
59  
60

For peer review only

## Bijlage A: contactgegevens

### Contactgegevens Erasmus MC

Bij vragen of opmerkingen kunt u contact opnemen met drs. W. Al Arashi, arts-onderzoeker, via telefoonnummer 06-34861847 (studietelefoon OPTI-CLOT studies).

U kunt ook contact opnemen met de hoofdonderzoeker Dr. M.H. Cnossen, kinderarts-hematoloog, via telefoonnummer 010-7036691.

Of met een van de andere onderzoekers:

Artsen Hematologie: tel: 010-7030148.

Hemofilieverpleegkundigen: tel. 06-12623034.

### Onafhankelijk deskundige

Als u twijfelt over deelname aan dit onderzoek, dan kunt u ook een onafhankelijk arts raadplegen, die zelf niet bij het onderzoek betrokken is, maar wel deskundig is op dit gebied: Prof. dr. H.A.W.M. Tiddens, kinderarts, tel. 010-7036690.

Ook als u vragen voor of tijdens het onderzoek hebt die u liever niet aan de onderzoekers stelt kunt u contact opnemen met de onafhankelijk arts.

### Klachtencommissie

Als u niet tevreden bent over het onderzoek of de behandeling, dan kunt u terecht bij de onafhankelijke klachtencommissie van het ziekenhuis. U kunt zich dan wenden tot:

De secretaris van de klachtencommissie Erasmus MC

Postbus 2040

3000 CA Rotterdam

Tel. 010-7033198

### Functionaris Gegevensbescherming voor het Erasmus MC:

Dhr. P. van Hoogdalem

Bereikbaar via het secretariaat van de Afdeling Juridische Zaken, tel. 010-7034986.

## Bijlage B: informatie over de verzekering

Voor iedereen die meedoet aan dit onderzoek, heeft het Erasmus MC een verzekering afgesloten. De verzekering dekt schade door deelname aan het onderzoek. Dit geldt voor schade tijdens het onderzoek of binnen vier jaar na het einde ervan. Schade moet u binnen die vier jaar aan de verzekeraar hebben gemeld.

De verzekering dekt niet alle schade. Onderaan deze tekst staat in het kort welke schade niet wordt gedekt.

Deze bepalingen staan in het Besluit verplichte verzekering bij medisch-wetenschappelijk onderzoek met mensen. Dit besluit staat op [www.ccmo.nl](http://www.ccmo.nl), de website van de Centrale Commissie Mensgebonden Onderzoek (zie 'Bibliotheek' en dan 'Wet- en regelgeving').

Bij schade kunt u direct contact leggen met de verzekeraar.

De verzekeraar van het onderzoek is:

Naam: CNA Insurance Company Limited

Adres: Strawinskylaan 703, 1077 XX Amsterdam

Telefoonnummer: +31 (0)20 573 72 74

E-mail: [Esther.vanherk@cna Hardy.com](mailto:Esther.vanherk@cna Hardy.com)

(Polisnummer: CT CNA-2015 HCCD0416C)

(Contactpersoon: Esther van Herk)

De verzekering biedt een dekking van € 650.000 per proefpersoon en € 5.000.000 voor het hele onderzoek (en € 7.500.000 per jaar voor alle onderzoeken van dezelfde opdrachtgever).

De verzekering dekt de volgende schade **niet**:

- schade door een risico waarover u in de schriftelijke informatie bent ingelicht. Dit geldt niet als het risico zich ernstiger voordoet dan was voorzien of als het risico heel onwaarschijnlijk was;
- schade aan uw gezondheid die ook zou zijn ontstaan als u niet aan het onderzoek had meegedaan;
- schade door het niet (volledig) opvolgen van aanwijzingen of instructies;
- schade aan uw nakomelingen, als gevolg van een negatief effect van het onderzoek op u of uw nakomelingen;
- schade door een bestaande behandelmethode bij onderzoek naar bestaande behandelmethoden.

## Bijlage C: overzicht onderzoekshandelingen

### 1. Indien u rondom de ingreep behandeld wordt met DDAVP

Dan dient u een relatief recente DDAVP-test te hebben of ondergaat u een DDAVP-test (indien uw behandeld arts het noodzakelijk vindt om een nieuwe DDAVP-test te doen, of als u nog nooit een DDAVP-test hebt gehad).

Als u eerst een DDAVP-test krijgt, zullen bij de start van de DDAVP-test 3-4 extra buisjes bloed worden afgenomen voor onderzoeksdoeleinden. Als u geen DDAVP-test meer hoeft te ondergaan voor de start van de ingreep, dan zullen 7 tot 9 extra buisjes bloed worden afgenomen vlak voor de ingreep. Bij de start van de DDAVP-test, of in de periode voor de ingreep zult u gewogen worden en een “lean body mass” meting krijgen.

### 2. Indien u rondom de ingreep behandeld wordt met stollingsfactorconcentraat

Voor het onderzoek is het nodig dat u in de periode voor de ingreep eenmalig op 3 achtereenvolgende dagen naar het ziekenhuis komt.

Tijdens deze bezoeken gebeurt het volgende:

- Dag 1: u wordt gewogen en er wordt een “lean body mass” meting gedaan. Er wordt bloed afgenomen (6 buisjes). Meteen hierna krijgt u eenmalig een dosering stollingsfactorconcentraat toegediend. Vervolgens wordt 10 minuten na de testdosis weer bloed afgenomen (4 buisjes). Twee tot zes uur na de toediening van de testdosis wordt nogmaals bloed afgenomen (4 buisjes). Het precieze tijdstip van deze bloedafname spreekt u af met de onderzoeker. Tussen de 2<sup>e</sup> en 3<sup>e</sup> bloedafname hoeft u niet in het ziekenhuis te blijven.
- Dag 2: ongeveer 24 uur na het toedienen van het stollingsfactorconcentraat wordt bloed afgenomen (4 buisjes), dit duurt ongeveer 15 minuten.
- Dag 3: ongeveer 48 uur na het toedienen van het stollingsfactorconcentraat wordt bloed afgenomen (4 buisjes), dit duurt ongeveer 15 minuten.

| In de periode voor de ingreep: eenmalig opstellen van een PK-profiel:                                                                                                                                                                                                                                                           |                                                                                   |                                                                                     |
|---------------------------------------------------------------------------------------------------------------------------------------------------------------------------------------------------------------------------------------------------------------------------------------------------------------------------------|-----------------------------------------------------------------------------------|-------------------------------------------------------------------------------------|
| <b>Dag 1:</b>                                                                                                                                                                                                                                                                                                                   | <b>Dag 2:</b>                                                                     | <b>Dag 3:</b>                                                                       |
| <ul style="list-style-type: none"> <li>- Weegen en "lean body mass" meting</li> <li>- Bloedafname (direct voor toediening testdosis)</li> <li>- Toediening testdosis stollingsfactorconcentraat</li> <li>- Bloedafname (10 minuten na toediening testdosis)</li> <li>- Bloedafname (2-6 uur na toediening testdosis)</li> </ul> | Bloedafname (+/-24 uur na testdosis)                                              | Bloedafname (+/-48 uur na toediening testdosis)                                     |
|                                                                                                                                                                                                                                                |  |  |

Aan de hand van de uitslagen van deze bloedafnames wordt voor u een persoonlijk farmacokinetisch model gemaakt. Rondom de ingreep wordt de dosering van het stollingsfactorconcentraat bepaald aan de hand van het farmacokinetisch model gebaseerd op gegevens van eerdere geopereerde patiënten, gecombineerd met uw persoonlijke model en de uitslagen van de dagelijkse bloedafnames na de ingreep.

### 3. Indien u behandeld wordt met DDAVP én stollingsfactorconcentraat

Dan dien je een relatief recente DDAVP-test te hebben of ondergaat u een DDAVP-test (indien uw behandelend arts het noodzakelijk vindt om een nieuwe DDAVP-test te doen, of als u nog nooit een DDAVP-test hebt gehad) (zie kopje 1).

Daarnaast zal een persoonlijk farmacokinetisch profiel gemaakt worden na toediening van stollingsfactorconcentraat (zie kopje 2). Tussen de eventuele DDAVP-test en het toedienen van stollingsfactorconcentraat voor het farmacokinetisch profiel moeten minstens 3 dagen zitten.



## Bijlage D: toestemmingsformulier volwassenen – medische interventies

### Onderzoek naar de effecten van farmacokinetische modellen bij het doseren DDAVP en/of stollingsfactorconcentraten bij patiënten met de ziekte van von Willebrand bij medische interventies

- Ik heb de informatiebrief gelezen. Ook kon ik vragen stellen. Mijn vragen zijn voldoende beantwoord. Ik had genoeg tijd om te beslissen of ik meedoe.
- Ik weet dat meedoen vrijwillig is. Ook weet ik dat ik op ieder moment kan beslissen om toch niet mee te doen of te stoppen met het onderzoek. Daarvoor hoef ik geen reden te geven.
- Ik weet dat voor de controle van het onderzoek sommige mensen mijn gegevens kunnen inzien. Die mensen staan vermeld in deze informatiebrief. Ik geef toestemming voor die inzage.
- Ik geef toestemming voor het verzamelen en gebruiken van mijn gegevens en bloedmonsters op de manier en voor de doelen die in de informatiebrief staan.
- Ik geef  **wel**
  - geen** toestemming om mijn lichaamsmateriaal nog 15 jaar na dit onderzoek te bewaren. Mogelijk kan dit later nog voor ander/meer onderzoek worden gebruikt, zoals in de informatiebrief staat.
- Ik geef  **wel**
  - geen** toestemming om mij na dit onderzoek opnieuw te benaderen voor een vervolgonderzoek.

1  
2  
3 Ik wil meedoen aan dit onderzoek.  
4  
5

6  
7 Naam proefpersoon:  
8  
9

10  
11 Handtekening:

Datum: \_\_/\_\_/\_\_

12  
13  
14  
15  
16  
17  
18 Ik verklaar dat ik deze proefpersoon volledig heb geïnformeerd over het genoemde onderzoek.  
19

20 Als er tijdens het onderzoek informatie bekend wordt die de toestemming van de proefpersoon zou  
21 kunnen beïnvloeden, dan breng ik hem/haar daarvan tijdig op de hoogte.  
22

23  
24 Naam onderzoeker (of diens vertegenwoordiger):  
25  
26

27  
28 Handtekening:

Datum: \_\_/\_\_/\_\_

29  
30  
31  
32 *De proefpersoon krijgt een volledige informatiebrief mee, samen met een kopie van het getekende*  
33 *toestemmingsformulier.*  
34  
35  
36  
37  
38  
39  
40  
41  
42  
43  
44  
45  
46  
47  
48  
49  
50  
51  
52  
53  
54  
55  
56  
57  
58  
59  
60

# Reporting checklist for protocol of a clinical trial.

Based on the SPIRIT guidelines.

## Instructions to authors

Complete this checklist by entering the page numbers from your manuscript where readers will find each of the items listed below.

Your article may not currently address all the items on the checklist. Please modify your text to include the missing information. If you are certain that an item does not apply, please write "n/a" and provide a short explanation.

Upload your completed checklist as an extra file when you submit to a journal.

In your methods section, say that you used the SPIRIT reporting guidelines, and cite them as:

Chan A-W, Tetzlaff JM, Gøtzsche PC, Altman DG, Mann H, Berlin J, Dickersin K, Hróbjartsson A, Schulz KF, Parulekar WR, Krleža-Jerić K, Laupacis A, Moher D. SPIRIT 2013 Explanation and Elaboration: Guidance for protocols of clinical trials. *BMJ*. 2013;346:e7586

|                                             |                     | Reporting Item                                                                                               | Page Number                     |
|---------------------------------------------|---------------------|--------------------------------------------------------------------------------------------------------------|---------------------------------|
| <b>Administrative information</b>           |                     |                                                                                                              |                                 |
| Title                                       | <a href="#">#1</a>  | Descriptive title identifying the study design, population, interventions, and, if applicable, trial acronym | 1                               |
| Trial registration                          | <a href="#">#2a</a> | Trial identifier and registry name. If not yet registered, name of intended registry                         | 3,6,15                          |
| Trial registration: data set                | <a href="#">#2b</a> | All items from the World Health Organization Trial Registration Data Set                                     | www.trialregister.nl:<br>NL7212 |
| Protocol version                            | <a href="#">#3</a>  | Date and version identifier                                                                                  | n/a                             |
| Funding                                     | <a href="#">#4</a>  | Sources and types of financial, material, and other support                                                  | 15                              |
| Roles and responsibilities: contributorship | <a href="#">#5a</a> | Names, affiliations, and roles of protocol contributors                                                      | 1                               |

|    |                      |                     |                                                     |        |
|----|----------------------|---------------------|-----------------------------------------------------|--------|
| 1  | Roles and            | <a href="#">#5b</a> | Name and contact information for the trial          | Supp 2 |
| 2  | responsibilities:    |                     | sponsor                                             |        |
| 3  | sponsor contact      |                     |                                                     |        |
| 4  | information          |                     |                                                     |        |
| 5  |                      |                     |                                                     |        |
| 6  |                      |                     |                                                     |        |
| 7  |                      |                     |                                                     |        |
| 8  | Roles and            | <a href="#">#5c</a> | Role of study sponsor and funders, if any, in       | Supp 7 |
| 9  | responsibilities:    |                     | study design; collection, management,               |        |
| 10 | sponsor and funder   |                     | analysis, and interpretation of data; writing of    |        |
| 11 |                      |                     | the report; and the decision to submit the          |        |
| 12 |                      |                     | report for publication, including whether they      |        |
| 13 |                      |                     | will have ultimate authority over any of these      |        |
| 14 |                      |                     | activities                                          |        |
| 15 |                      |                     |                                                     |        |
| 16 |                      |                     |                                                     |        |
| 17 |                      |                     |                                                     |        |
| 18 |                      |                     |                                                     |        |
| 19 | Roles and            | <a href="#">#5d</a> | Composition, roles, and responsibilities of the     | Supp 1 |
| 20 | responsibilities:    |                     | coordinating centre, steering committee,            |        |
| 21 | committees           |                     | endpoint adjudication committee, data               |        |
| 22 |                      |                     | management team, and other individuals or           |        |
| 23 |                      |                     | groups overseeing the trial, if applicable (see     |        |
| 24 |                      |                     | Item 21a for data monitoring committee)             |        |
| 25 |                      |                     |                                                     |        |
| 26 |                      |                     |                                                     |        |
| 27 |                      |                     |                                                     |        |
| 28 |                      |                     |                                                     |        |
| 29 | <b>Introduction</b>  |                     |                                                     |        |
| 30 |                      |                     |                                                     |        |
| 31 | Background and       | <a href="#">#6a</a> | Description of research question and                | 5,6    |
| 32 | rationale            |                     | justification for undertaking the trial, including  |        |
| 33 |                      |                     | summary of relevant studies (published and          |        |
| 34 |                      |                     | unpublished) examining benefits and harms for       |        |
| 35 |                      |                     | each intervention                                   |        |
| 36 |                      |                     |                                                     |        |
| 37 |                      |                     |                                                     |        |
| 38 |                      |                     |                                                     |        |
| 39 | Background and       | <a href="#">#6b</a> | Explanation for choice of comparators               | 5      |
| 40 | rationale: choice of |                     |                                                     |        |
| 41 | comparators          |                     |                                                     |        |
| 42 |                      |                     |                                                     |        |
| 43 |                      |                     |                                                     |        |
| 44 |                      |                     |                                                     |        |
| 45 | Objectives           | <a href="#">#7</a>  | Specific objectives or hypotheses                   | 6      |
| 46 |                      |                     |                                                     |        |
| 47 | Trial design         | <a href="#">#8</a>  | Description of trial design including type of trial | 6      |
| 48 |                      |                     | (eg, parallel group, crossover, factorial, single   |        |
| 49 |                      |                     | group), allocation ratio, and framework (eg,        |        |
| 50 |                      |                     | superiority, equivalence, non-inferiority,          |        |
| 51 |                      |                     | exploratory)                                        |        |
| 52 |                      |                     |                                                     |        |
| 53 |                      |                     |                                                     |        |
| 54 |                      |                     |                                                     |        |

**Methods:  
Participants,**

## interventions, and outcomes

|                                 |                      |                                                                                                                                                                                                                                                                                                                                                                                |           |
|---------------------------------|----------------------|--------------------------------------------------------------------------------------------------------------------------------------------------------------------------------------------------------------------------------------------------------------------------------------------------------------------------------------------------------------------------------|-----------|
| Study setting                   | <a href="#">#9</a>   | Description of study settings (eg, community clinic, academic hospital) and list of countries where data will be collected. Reference to where list of study sites can be obtained                                                                                                                                                                                             | 7, supp 2 |
| Eligibility criteria            | <a href="#">#10</a>  | Inclusion and exclusion criteria for participants. If applicable, eligibility criteria for study centres and individuals who will perform the interventions (eg, surgeons, psychotherapists)                                                                                                                                                                                   | 7         |
| Interventions: description      | <a href="#">#11a</a> | Interventions for each group with sufficient detail to allow replication, including how and when they will be administered                                                                                                                                                                                                                                                     | 8,9,10    |
| Interventions: modifications    | <a href="#">#11b</a> | Criteria for discontinuing or modifying allocated interventions for a given trial participant (eg, drug dose change in response to harms, participant request, or improving / worsening disease)                                                                                                                                                                               | 8         |
| Interventions: adherence        | <a href="#">#11c</a> | Strategies to improve adherence to intervention protocols, and any procedures for monitoring adherence (eg, drug tablet return; laboratory tests)                                                                                                                                                                                                                              | n/a       |
| Interventions: concomitant care | <a href="#">#11d</a> | Relevant concomitant care and interventions that are permitted or prohibited during the trial                                                                                                                                                                                                                                                                                  | n/a       |
| Outcomes                        | <a href="#">#12</a>  | Primary, secondary, and other outcomes, including the specific measurement variable (eg, systolic blood pressure), analysis metric (eg, change from baseline, final value, time to event), method of aggregation (eg, median, proportion), and time point for each outcome. Explanation of the clinical relevance of chosen efficacy and harm outcomes is strongly recommended | 9,10      |
| Participant timeline            | <a href="#">#13</a>  | Time schedule of enrolment, interventions (including any run-ins and washouts),                                                                                                                                                                                                                                                                                                | 8,9,10    |

assessments, and visits for participants. A schematic diagram is highly recommended (see Figure)

1  
2  
3  
4  
5 Sample size [#14](#) Estimated number of participants needed to 12,13  
6 achieve study objectives and how it was  
7 determined, including clinical and statistical  
8 assumptions supporting any sample size  
9 calculations  
10  
11  
12

13  
14 Recruitment [#15](#) Strategies for achieving adequate participant n/a  
15 enrolment to reach target sample size  
16

17 **Methods:**  
18 **Assignment of**  
19 **interventions (for**  
20 **controlled trials)**  
21  
22  
23

24 Allocation: [#16a](#) Method of generating the allocation sequence n/a  
25 sequence (eg, computer-generated random numbers),  
26 generation and list of any factors for stratification. To  
27 reduce predictability of a random sequence,  
28 details of any planned restriction (eg, blocking)  
29 should be provided in a separate document  
30 that is unavailable to those who enrol  
31 participants or assign interventions  
32  
33  
34  
35  
36

37 Allocation [#16b](#) Mechanism of implementing the allocation n/a  
38 concealment sequence (eg, central telephone; sequentially  
39 mechanism numbered, opaque, sealed envelopes),  
40 describing any steps to conceal the sequence  
41 until interventions are assigned  
42  
43  
44

45 Allocation: [#16c](#) Who will generate the allocation sequence, n/a  
46 implementation who will enrol participants, and who will assign  
47 participants to interventions  
48  
49

50  
51 Blinding (masking) [#17a](#) Who will be blinded after assignment to n/a  
52 interventions (eg, trial participants, care  
53 providers, outcome assessors, data analysts),  
54 and how  
55  
56  
57  
58  
59  
60

|    |                        |                      |                                                    |        |
|----|------------------------|----------------------|----------------------------------------------------|--------|
| 1  | Blinding (masking):    | <a href="#">#17b</a> | If blinded, circumstances under which              | n/a    |
| 2  | emergency              |                      | unblinding is permissible, and procedure for       |        |
| 3  | unblinding             |                      | revealing a participant's allocated intervention   |        |
| 4  |                        |                      | during the trial                                   |        |
| 5  |                        |                      |                                                    |        |
| 6  |                        |                      |                                                    |        |
| 7  |                        |                      |                                                    |        |
| 8  | <b>Methods: Data</b>   |                      |                                                    |        |
| 9  | <b>collection,</b>     |                      |                                                    |        |
| 10 | <b>management, and</b> |                      |                                                    |        |
| 11 | <b>analysis</b>        |                      |                                                    |        |
| 12 |                        |                      |                                                    |        |
| 13 |                        |                      |                                                    |        |
| 14 | Data collection plan   | <a href="#">#18a</a> | Plans for assessment and collection of             | 12,13  |
| 15 |                        |                      | outcome, baseline, and other trial data,           |        |
| 16 |                        |                      | including any related processes to promote         |        |
| 17 |                        |                      | data quality (eg, duplicate measurements,          |        |
| 18 |                        |                      | training of assessors) and a description of        |        |
| 19 |                        |                      | study instruments (eg, questionnaires,             |        |
| 20 |                        |                      | laboratory tests) along with their reliability and |        |
| 21 |                        |                      | validity, if known. Reference to where data        |        |
| 22 |                        |                      | collection forms can be found, if not in the       |        |
| 23 |                        |                      | protocol                                           |        |
| 24 |                        |                      |                                                    |        |
| 25 |                        |                      |                                                    |        |
| 26 |                        |                      |                                                    |        |
| 27 |                        |                      |                                                    |        |
| 28 |                        |                      |                                                    |        |
| 29 |                        |                      |                                                    |        |
| 30 | Data collection plan:  | <a href="#">#18b</a> | Plans to promote participant retention and         | n/a    |
| 31 | retention              |                      | complete follow-up, including list of any          |        |
| 32 |                        |                      | outcome data to be collected for participants      |        |
| 33 |                        |                      | who discontinue or deviate from intervention       |        |
| 34 |                        |                      | protocols                                          |        |
| 35 |                        |                      |                                                    |        |
| 36 |                        |                      |                                                    |        |
| 37 |                        |                      |                                                    |        |
| 38 |                        |                      |                                                    |        |
| 39 | Data management        | <a href="#">#19</a>  | Plans for data entry, coding, security, and        | supp 3 |
| 40 |                        |                      | storage, including any related processes to        |        |
| 41 |                        |                      | promote data quality (eg, double data entry;       |        |
| 42 |                        |                      | range checks for data values). Reference to        |        |
| 43 |                        |                      | where details of data management procedures        |        |
| 44 |                        |                      | can be found, if not in the protocol               |        |
| 45 |                        |                      |                                                    |        |
| 46 |                        |                      |                                                    |        |
| 47 |                        |                      |                                                    |        |
| 48 | Statistics: outcomes   | <a href="#">#20a</a> | Statistical methods for analysing primary and      | 13,14  |
| 49 |                        |                      | secondary outcomes. Reference to where             |        |
| 50 |                        |                      | other details of the statistical analysis plan can |        |
| 51 |                        |                      | be found, if not in the protocol                   |        |
| 52 |                        |                      |                                                    |        |
| 53 |                        |                      |                                                    |        |
| 54 |                        |                      |                                                    |        |
| 55 | Statistics: additional | <a href="#">#20b</a> | Methods for any additional analyses (eg,           | 13,14  |
| 56 | analyses               |                      | subgroup and adjusted analyses)                    |        |
| 57 |                        |                      |                                                    |        |
| 58 |                        |                      |                                                    |        |
| 59 |                        |                      |                                                    |        |
| 60 |                        |                      |                                                    |        |

|    |                      |                      |                                                     |        |
|----|----------------------|----------------------|-----------------------------------------------------|--------|
| 1  | Statistics: analysis | <a href="#">#20c</a> | Definition of analysis population relating to       | n/a    |
| 2  | population and       |                      | protocol non-adherence (eg, as randomised           |        |
| 3  | missing data         |                      | analysis), and any statistical methods to           |        |
| 4  |                      |                      | handle missing data (eg, multiple imputation)       |        |
| 5  |                      |                      |                                                     |        |
| 6  |                      |                      |                                                     |        |
| 7  |                      |                      |                                                     |        |
| 8  | <b>Methods:</b>      |                      |                                                     |        |
| 9  | <b>Monitoring</b>    |                      |                                                     |        |
| 10 |                      |                      |                                                     |        |
| 11 | Data monitoring:     | <a href="#">#21a</a> | Composition of data monitoring committee            | 14     |
| 12 | formal committee     |                      | (DMC); summary of its role and reporting            |        |
| 13 |                      |                      | structure; statement of whether it is               |        |
| 14 |                      |                      | independent from the sponsor and competing          |        |
| 15 |                      |                      | interests; and reference to where further           |        |
| 16 |                      |                      | details about its charter can be found, if not in   |        |
| 17 |                      |                      | the protocol. Alternatively, an explanation of      |        |
| 18 |                      |                      | why a DMC is not needed                             |        |
| 19 |                      |                      |                                                     |        |
| 20 |                      |                      |                                                     |        |
| 21 |                      |                      |                                                     |        |
| 22 |                      |                      |                                                     |        |
| 23 |                      |                      |                                                     |        |
| 24 | Data monitoring:     | <a href="#">#21b</a> | Description of any interim analyses and             | supp 7 |
| 25 | interim analysis     |                      | stopping guidelines, including who will have        |        |
| 26 |                      |                      | access to these interim results and make the        |        |
| 27 |                      |                      | final decision to terminate the trial               |        |
| 28 |                      |                      |                                                     |        |
| 29 |                      |                      |                                                     |        |
| 30 |                      |                      |                                                     |        |
| 31 | Harms                | <a href="#">#22</a>  | Plans for collecting, assessing, reporting, and     | 14     |
| 32 |                      |                      | managing solicited and spontaneously                |        |
| 33 |                      |                      | reported adverse events and other unintended        |        |
| 34 |                      |                      | effects of trial interventions or trial conduct     |        |
| 35 |                      |                      |                                                     |        |
| 36 |                      |                      |                                                     |        |
| 37 |                      |                      |                                                     |        |
| 38 | Auditing             | <a href="#">#23</a>  | Frequency and procedures for auditing trial         | supp 4 |
| 39 |                      |                      | conduct, if any, and whether the process will       |        |
| 40 |                      |                      | be independent from investigators and the           |        |
| 41 |                      |                      | sponsor                                             |        |
| 42 |                      |                      |                                                     |        |
| 43 |                      |                      |                                                     |        |
| 44 |                      |                      |                                                     |        |
| 45 | <b>Ethics and</b>    |                      |                                                     |        |
| 46 | <b>dissemination</b> |                      |                                                     |        |
| 47 |                      |                      |                                                     |        |
| 48 |                      |                      |                                                     |        |
| 49 | Research ethics      | <a href="#">#24</a>  | Plans for seeking research ethics committee /       | 14     |
| 50 | approval             |                      | institutional review board (REC / IRB) approval     |        |
| 51 |                      |                      |                                                     |        |
| 52 |                      |                      |                                                     |        |
| 53 | Protocol             | <a href="#">#25</a>  | Plans for communicating important protocol          | supp 5 |
| 54 | amendments           |                      | modifications (eg, changes to eligibility criteria, |        |
| 55 |                      |                      | outcomes, analyses) to relevant parties (eg,        |        |
| 56 |                      |                      | investigators, REC / IRBs, trial participants,      |        |
| 57 |                      |                      | trial registries, journals, regulators)             |        |
| 58 |                      |                      |                                                     |        |
| 59 |                      |                      |                                                     |        |
| 60 |                      |                      |                                                     |        |



|    |                       |                      |                                                                                                                                                                                                                                                                                     |        |
|----|-----------------------|----------------------|-------------------------------------------------------------------------------------------------------------------------------------------------------------------------------------------------------------------------------------------------------------------------------------|--------|
| 1  | Consent or assent     | <a href="#">#26a</a> | Who will obtain informed consent or assent from potential trial participants or authorised surrogates, and how (see Item 32)                                                                                                                                                        | 14     |
| 2  |                       |                      |                                                                                                                                                                                                                                                                                     |        |
| 3  |                       |                      |                                                                                                                                                                                                                                                                                     |        |
| 4  |                       |                      |                                                                                                                                                                                                                                                                                     |        |
| 5  |                       |                      |                                                                                                                                                                                                                                                                                     |        |
| 6  | Consent or assent:    | <a href="#">#26b</a> | Additional consent provisions for collection and use of participant data and biological specimens in ancillary studies, if applicable                                                                                                                                               | n/a    |
| 7  | ancillary studies     |                      |                                                                                                                                                                                                                                                                                     |        |
| 8  |                       |                      |                                                                                                                                                                                                                                                                                     |        |
| 9  |                       |                      |                                                                                                                                                                                                                                                                                     |        |
| 10 |                       |                      |                                                                                                                                                                                                                                                                                     |        |
| 11 | Confidentiality       | <a href="#">#27</a>  | How personal information about potential and enrolled participants will be collected, shared, and maintained in order to protect confidentiality before, during, and after the trial                                                                                                | supp 3 |
| 12 |                       |                      |                                                                                                                                                                                                                                                                                     |        |
| 13 |                       |                      |                                                                                                                                                                                                                                                                                     |        |
| 14 |                       |                      |                                                                                                                                                                                                                                                                                     |        |
| 15 |                       |                      |                                                                                                                                                                                                                                                                                     |        |
| 16 |                       |                      |                                                                                                                                                                                                                                                                                     |        |
| 17 |                       |                      |                                                                                                                                                                                                                                                                                     |        |
| 18 | Declaration of        | <a href="#">#28</a>  | Financial and other competing interests for principal investigators for the overall trial and each study site                                                                                                                                                                       | 16     |
| 19 | interests             |                      |                                                                                                                                                                                                                                                                                     |        |
| 20 |                       |                      |                                                                                                                                                                                                                                                                                     |        |
| 21 |                       |                      |                                                                                                                                                                                                                                                                                     |        |
| 22 |                       |                      |                                                                                                                                                                                                                                                                                     |        |
| 23 | Data access           | <a href="#">#29</a>  | Statement of who will have access to the final trial dataset, and disclosure of contractual agreements that limit such access for investigators                                                                                                                                     | supp 7 |
| 24 |                       |                      |                                                                                                                                                                                                                                                                                     |        |
| 25 |                       |                      |                                                                                                                                                                                                                                                                                     |        |
| 26 |                       |                      |                                                                                                                                                                                                                                                                                     |        |
| 27 |                       |                      |                                                                                                                                                                                                                                                                                     |        |
| 28 |                       |                      |                                                                                                                                                                                                                                                                                     |        |
| 29 |                       |                      |                                                                                                                                                                                                                                                                                     |        |
| 30 | Ancillary and post    | <a href="#">#30</a>  | Provisions, if any, for ancillary and post-trial care, and for compensation to those who suffer harm from trial participation                                                                                                                                                       | supp 6 |
| 31 | trial care            |                      |                                                                                                                                                                                                                                                                                     |        |
| 32 |                       |                      |                                                                                                                                                                                                                                                                                     |        |
| 33 |                       |                      |                                                                                                                                                                                                                                                                                     |        |
| 34 |                       |                      |                                                                                                                                                                                                                                                                                     |        |
| 35 |                       |                      |                                                                                                                                                                                                                                                                                     |        |
| 36 | Dissemination         | <a href="#">#31a</a> | Plans for investigators and sponsor to communicate trial results to participants, healthcare professionals, the public, and other relevant groups (eg, via publication, reporting in results databases, or other data sharing arrangements), including any publication restrictions | 14,15  |
| 37 | policy: trial results |                      |                                                                                                                                                                                                                                                                                     |        |
| 38 |                       |                      |                                                                                                                                                                                                                                                                                     |        |
| 39 |                       |                      |                                                                                                                                                                                                                                                                                     |        |
| 40 |                       |                      |                                                                                                                                                                                                                                                                                     |        |
| 41 |                       |                      |                                                                                                                                                                                                                                                                                     |        |
| 42 |                       |                      |                                                                                                                                                                                                                                                                                     |        |
| 43 |                       |                      |                                                                                                                                                                                                                                                                                     |        |
| 44 |                       |                      |                                                                                                                                                                                                                                                                                     |        |
| 45 |                       |                      |                                                                                                                                                                                                                                                                                     |        |
| 46 |                       |                      |                                                                                                                                                                                                                                                                                     |        |
| 47 | Dissemination         | <a href="#">#31b</a> | Authorship eligibility guidelines and any intended use of professional writers                                                                                                                                                                                                      | n/a    |
| 48 | policy: authorship    |                      |                                                                                                                                                                                                                                                                                     |        |
| 49 |                       |                      |                                                                                                                                                                                                                                                                                     |        |
| 50 |                       |                      |                                                                                                                                                                                                                                                                                     |        |
| 51 | Dissemination         | <a href="#">#31c</a> | Plans, if any, for granting public access to the full protocol, participant-level dataset, and statistical code                                                                                                                                                                     | n/a    |
| 52 | policy: reproducible  |                      |                                                                                                                                                                                                                                                                                     |        |
| 53 | research              |                      |                                                                                                                                                                                                                                                                                     |        |
| 54 |                       |                      |                                                                                                                                                                                                                                                                                     |        |
| 55 |                       |                      |                                                                                                                                                                                                                                                                                     |        |

## Appendices

|                                    |                            |                     |                                                                                                                                                                                                |        |
|------------------------------------|----------------------------|---------------------|------------------------------------------------------------------------------------------------------------------------------------------------------------------------------------------------|--------|
| 1<br>2<br>3<br>4<br>5              | Informed consent materials | <a href="#">#32</a> | Model consent form and other related documentation given to participants and authorised surrogates                                                                                             | supp 8 |
| 6<br>7<br>8<br>9<br>10<br>11<br>12 | Biological specimens       | <a href="#">#33</a> | Plans for collection, laboratory evaluation, and storage of biological specimens for genetic or molecular analysis in the current trial and for future use in ancillary studies, if applicable | n/a    |

## Notes:

- 2b: [www.trialregister.nl](http://www.trialregister.nl): NL7212 The SPIRIT checklist is distributed under the terms of the Creative Commons Attribution License CC-BY-ND 3.0. This checklist was completed on 25. January 2021 using <https://www.goodreports.org/>, a tool made by the [EQUATOR Network](#) in collaboration with [Penelope.ai](#)

# BMJ Open

**Is pharmacokinetic-guided dosing of desmopressin and von Willebrand factor-containing concentrates in individuals with von Willebrand disease or low von Willebrand factor reliable and feasible? A protocol for a multicenter, non-randomized, open label cohort trial, the OPTI-CLOT: To Win study**

|                                 |                                                                                                                                                                                                                                                                                                                                                                                                                                                                                                                                                                                                                                                               |
|---------------------------------|---------------------------------------------------------------------------------------------------------------------------------------------------------------------------------------------------------------------------------------------------------------------------------------------------------------------------------------------------------------------------------------------------------------------------------------------------------------------------------------------------------------------------------------------------------------------------------------------------------------------------------------------------------------|
| Journal:                        | <i>BMJ Open</i>                                                                                                                                                                                                                                                                                                                                                                                                                                                                                                                                                                                                                                               |
| Manuscript ID                   | bmjopen-2021-049493.R1                                                                                                                                                                                                                                                                                                                                                                                                                                                                                                                                                                                                                                        |
| Article Type:                   | Protocol                                                                                                                                                                                                                                                                                                                                                                                                                                                                                                                                                                                                                                                      |
| Date Submitted by the Author:   | 01-Jul-2021                                                                                                                                                                                                                                                                                                                                                                                                                                                                                                                                                                                                                                                   |
| Complete List of Authors:       | Heijdra, Jessica; Erasmus MC Sophia, Pediatric Hematology<br>Al Arashi, Wala; Erasmus MC Sophia, Pediatric Hematology<br>de Jager, Nico; Amsterdam UMC Location AMC, Hospital Pharmacy - Clinical Pharmacology<br>Cloesmeijer, Michael; Amsterdam UMC Location AMC, Hospital Pharmacy - Clinical Pharmacology<br>Bukkems, Laura; Amsterdam UMC Location AMC, Hospital Pharmacy - Clinical Pharmacology<br>Zwaan, Christian; Erasmus MC Sophia, Pediatric Oncology<br>Leebeek, Frank; Erasmus MC, Hematology<br>Mathôt, Ron; Amsterdam UMC Location AMC, Hospital Pharmacy - Clinical Pharmacology<br>Cnossen, Marjon; Erasmus MC Sophia, Pediatric Hematology |
| <b>Primary Subject Heading</b>: | Haematology (incl blood transfusion)                                                                                                                                                                                                                                                                                                                                                                                                                                                                                                                                                                                                                          |
| Secondary Subject Heading:      | Surgery                                                                                                                                                                                                                                                                                                                                                                                                                                                                                                                                                                                                                                                       |
| Keywords:                       | Bleeding disorders & coagulopathies < HAEMATOLOGY, Protocols & guidelines < HEALTH SERVICES ADMINISTRATION & MANAGEMENT, Clinical trials < THERAPEUTICS                                                                                                                                                                                                                                                                                                                                                                                                                                                                                                       |
|                                 |                                                                                                                                                                                                                                                                                                                                                                                                                                                                                                                                                                                                                                                               |

SCHOLARONE™  
Manuscripts

1  
2  
3 1 **Is pharmacokinetic-guided dosing of desmopressin and von Willebrand factor-containing**  
4 **concentrates in individuals with von Willebrand disease or low von Willebrand factor reliable**  
5 **and feasible? A protocol for a multicenter, non-randomized, open label cohort trial, the OPTI-**  
6 **CLOT: To WiN study**  
7  
8  
9

10  
11 5 Jessica M. Heijdra<sup>1</sup>, Wala Al Arashi<sup>1</sup>, Nico C.B. de Jager<sup>2</sup>, Michael E. Cloesmeijer<sup>2</sup>, Laura H.  
12 Bukkems<sup>2</sup>, Christian M. Zwaan<sup>3</sup>, Frank W.G. Leebeek<sup>4</sup>, Ron A.A. Mathôt<sup>2</sup>, & Marjon H. Cnossen<sup>1</sup>  
13  
14 7

15  
16 8 <sup>1</sup>*Department of Pediatric Hematology, Erasmus MC – Sophia Children’s Hospital, University*  
17 *Medical Center Rotterdam, Rotterdam, the Netherlands*

18  
19  
20 10 <sup>2</sup>*Hospital Pharmacy – Clinical Pharmacology, Amsterdam UMC, University of Amsterdam,*  
21 *Amsterdam, the Netherlands*

22  
23 12 <sup>3</sup>*Department of Pediatric Oncology, Erasmus MC – Sophia Children’s Hospital, University*  
24 *Medical Center Rotterdam, Rotterdam, the Netherlands*

25  
26  
27 14 <sup>4</sup>*Department of Hematology, Erasmus MC, University Medical Center Rotterdam, Rotterdam,*  
28 *the Netherlands*  
29  
30  
31 16

32  
33 17 This study is part of the OPTI-CLOT research programme (Patient tailOred PharmacokineTic-  
34 guided dosing of CLOTting factor concentrates and desmopressin in bleeding disorders), an  
35 (inter)national multicenter study. Its aim is to construct and enrich population PK-models for  
36 factor replacement therapy, desmopressin and alternative treatments, and to implement PK-  
37 guided dosing by demonstrating its implications and feasibility, thereby increasing knowledge  
38 of patient-tailored PK-guided dosing in bleeding disorders.  
39  
40  
41  
42  
43  
44 23

45 24 Corresponding author:

46  
47  
48 25 Dr. Marjon H. Cnossen, MD PhD

49  
50 26 Department of Pediatric Hematology

51  
52 27 Erasmus University Medical Center – Sophia Children’s Hospital

53  
54 28 Room SP-2435

55  
56 29 P.O. Box 2040  
57  
58  
59  
60

1  
2  
3 1 3000 CA Rotterdam

4  
5 2 The Netherlands

6  
7 3 E-mail: [m.cnossen@erasmusmc.nl](mailto:m.cnossen@erasmusmc.nl)

8  
9 4

10 5 Keywords: von Willebrand disease, precision medicine, pharmacokinetics, desmopressin, factor  
11 concentrates  
12  
13 6

14 7

15  
16 8

For peer review only

## 1           2           3           4           5           6           7           8           9           10           11           12           13           14           15           16           17           18           19           20           21           22           23           24           25           26           27           28           29           30           31           32           33           34           35           36           37           38           39           40           41           42           43           44           45           46           47           48           49           50           51           52           53           54           55           56           57           58           59           60

### 1   **ABSTRACT**

2   **Introduction** Von Willebrand disease (VWD) is a bleeding disorder, caused by a deficiency or  
3   defect of von Willebrand factor (VWF). In case of medical procedures or bleeding, patients are  
4   treated with desmopressin and/or VWF-containing concentrates to increase plasma VWF and  
5   factor VIII (FVIII). However, in many cases these factor levels are outside the targeted range.  
6   Therefore, population pharmacokinetic (PK) models have been developed, which aim to  
7   quantify and explain intra-individual and inter-individual differences in treatment response.  
8   These models enable calculation of individual PK parameters by Bayesian analysis, based on an  
9   individual desmopressin test or PK profile with a VWF-containing concentrate. Subsequently,  
10   the dose necessary for an individual to achieve coagulation factor target levels can be  
11   calculated.

12   **Methods and analysis** Primary aim of this study is to assess the predictive performance (the  
13   difference between predicted and measured von VWF activity and FVIII levels) of Bayesian  
14   forecasting using the developed population PK models in four different situations: A)  
15   desmopressin testing (n ≥30); B) medical procedures (n = 70; 30 receiving desmopressin, 30  
16   receiving VWF-containing concentrate and 10 receiving a combination of both); C) bleeding  
17   episodes (n = 20; 10 receiving desmopressin and 10 receiving VWF containing concentrate); and  
18   D) prophylaxis with a VWF containing concentrate (n = 3 to 5). Individuals with all types of VWD  
19   and individuals with low VWF (VWF 0.30-0.60 IU/mL) will be included. Reliability and feasibility  
20   of PK-guided dosing will be tested by assessing predictive performance, treatment duration,  
21   hemostasis, patient satisfaction and physician satisfaction.

22   **Ethics and dissemination** The OPTI-CLOT:To WiN study was approved by the medical ethics  
23   committee of the Erasmus MC, University Medical Center Rotterdam, the Netherlands. Results  
24   of the study will be communicated through publication in international scientific journals and  
25   presentation at (inter)national conferences.

26   **Trial registration number:** NL7212 (NTR7411); Pre-results.

## 1     **STRENGTHS AND LIMITATIONS OF THIS STUDY**

- 2     - We will include individuals with VWD and low VWF from different hemophilia  
3     treatment centers in the Netherlands.
- 4     - This is the first study to assess reliability and predictive performance of population  
5     pharmacokinetic models for desmopressin and VWF-containing concentrates in clinical  
6     practice.
- 7     - Treatment choice (desmopressin and/or von Willebrand factor-containing concentrate)  
8     and brand of medication will be at the discretion of the treating physician to approach  
9     the real-life situation as much as possible.
- 10    - The developed population pharmacokinetic models will be tested in different situations:  
11    during desmopressin testing, during treatment for medical procedures or bleeding, and  
12    during prophylactic treatment.
- 13    - Due to the relatively small patient numbers in each of the different situations,  
14    randomization of treatment is not possible.

## 1 INTRODUCTION

2 Von Willebrand disease (VWD) is the most common inherited bleeding disorder.<sup>1</sup> It is caused by  
3 low or absent von Willebrand factor (VWF), or by a functional defect of VWF. VWF is essential  
4 for primary hemostasis as it facilitates platelet plug formation at sites of vascular injury. It also  
5 plays a role in secondary hemostasis, as it protects factor VIII (FVIII) from being cleared from  
6 the circulation. Symptoms of VWD include bleeding after trauma or surgery and (spontaneous)  
7 mucocutaneous bleeding. VWD is classified into three main types: type 1 and type 3 are  
8 respectively; a partial (VWF <0.30 IU/mL) and a complete (VWF <0.05 IU/mL) absence of VWF,  
9 whereas type 2 comprises several functional defects of VWF.<sup>2</sup> In type 2A, binding of VWF to  
10 platelets is decreased, while in type 2B, affinity of VWF for platelets is increased. In both type  
11 2A and 2B, there is an absence of high molecular weight VWF multimers (HMWM). In type 2M,  
12 platelet binding is decreased, but this is not caused by the absence of HMWM. In type 2N, often  
13 VWF levels are normal, however affinity of VWF for FVIII is decreased, leading to decreased  
14 FVIII levels. Individuals with low VWF have a bleeding tendency associated with VWF levels  
15 between 0.30-0.60 IU/mL.<sup>3</sup>

16 Individuals with VWD are treated with desmopressin or -in more severe cases or when  
17 prophylactic therapy is needed- VWF-containing concentrates. Main reasons for treatment are  
18 acute bleeding and prevention of bleeding during medical procedures, e.g. dental procedures,  
19 surgery or delivery. Prophylactic treatment to prevent spontaneous bleeding is seldom  
20 necessary and mainly applied in type 3 and severely affected type 1 and 2 patients. Aim of  
21 treatment is to accomplish sufficient hemostasis by achieving physiologically normal plasma  
22 coagulation factor levels. However, it has been previously reported in a study on perioperative  
23 treatment of VWD patients with Haemate P, that a majority (65%, 53% and 57% in type 1, type  
24 2 and type 3 respectively) of patients achieves VWF:Act levels than aimed for, and a minority  
25 (16%, 38% and 29% in type 1, type 2 and type 3 VWD respectively) does not reach sufficient  
26 levels for adequate hemostasis.<sup>4</sup> This may lead to an increased risk of either thrombosis or  
27 bleeding. Moreover, costs of treatment are high as VWF-containing factor concentrates are  
28 expensive and frequent laboratory monitoring of plasma VWF and FVIII is usually required. As  
29 rising health care costs are an increasing concern, it is important to investigate alternative



1  
2  
3 1 dosing strategies that facilitate more precise dosing, to improve quality of care with potential  
4  
5 2 reduction of costs.

6  
7 3         Currently, desmopressin dosage and dosing frequency are solely based on body weight  
8  
9 4 and estimated degree of tachyphylaxis. Dosing of VWF-containing concentrates is also based on  
10  
11 5 body weight, and dose calculations are made according to target VWF and FVIII values based on  
12  
13 6 the severity of the bleed or the type of medical procedure.<sup>5</sup> However, pharmacokinetics (PK) of  
14  
15 7 desmopressin and VWF-containing concentrates differ within and between patients (i.e. intra-  
16  
17 8 individual and inter-individual differences), and large inter-individual differences in response to  
18  
19 9 desmopressin are observed.<sup>6-8</sup> Population PK models that describe plasma VWF activity  
20  
21 10 (VWF:Act) and FVIII after administration of desmopressin or VWF-containing concentrates,  
22  
23 11 based on retrospective DDAVP-testing data and VWF-containing concentrate treatment data  
24  
25 12 from multiple hemophilia treatment centers in the Netherlands and in the United Kingdom,  
26  
27 13 have been constructed by our group (however not all models have been published yet).<sup>9,10</sup> In a  
28  
29 14 population PK model, the typical PK parameters and their corresponding variability are  
30  
31 15 estimated. Subsequently, covariate relationships, e.g. patient characteristics and procedure  
32  
33 16 characteristics, can be used to (partially) explain the estimated variability.<sup>11</sup>

34  
35 17         With these population PK models, we are able to perform Bayesian forecasting: all  
36  
37 18 information and sources of uncertainty are combined into a predictive distribution for the  
38  
39 19 future values, after which point and interval forecasts can be obtained.<sup>12</sup> In our models,  
40  
41 20 individual VWF:Act and FVIII PK parameters are calculated, based on patient characteristics  
42  
43 21 combined with VWF:Act and FVIII measurements after an individual test dose of desmopressin  
44  
45 22 or VWF-containing concentrate, or by using data acquired during a bleeding episode or medical  
46  
47 23 procedure. Based on the estimated individual PK parameters, we are able to design a  
48  
49 24 personalized dosing strategy for each patient. We hypothesize that PK-guided dosing of  
50  
51 25 desmopressin and VWF-containing concentrates may strongly improve safety and efficacy of  
52  
53 26 therapy and lower treatment costs. It is essential to first evaluate the predictive performance of  
54  
55 27 PK-guided dosing and the feasibility of this approach prospectively, in order to prove its  
56  
57 28 effectiveness and safety.

58  
59  
60 29



- 1  
2  
3 1 - With bleeding requiring treatment with desmopressin and/or a VWF-containing  
4  
5 2 concentrate with monitoring of VWF and FVIII levels, or;  
6  
7 3 - Requiring prophylaxis with a VWF-containing concentrate due to frequent bleeding  
8  
9 4 episodes;  
10  
11 5 - Informed patient consent if patient is  $\geq 12$  years and (also) parental informed consent if  
12  
13 6 patient is  $< 16$  years.  
14  
15 7

### 8 **Exclusion criteria**

- 16  
17  
18 9 - Any other known hemostatic abnormalities;  
19  
20 10 - Acquired VWD;  
21  
22 11 - Presence of VWF antibodies ( $> 0.2$  BU);  
23  
24 12  
25  
26 13

### 27 **Intervention**

28  
29 15 Predictive performance will be tested in all study arms, and feasibility of PK-guided dosing will  
30  
31 16 be tested in arm B, C and D:

32  
33 17 Arm A: patients who will undergo a desmopressin test.

34  
35 18 Arm B: patients who will undergo an elective medical procedure.

36  
37 19 Arm C: patients with a bleeding episode.

38  
39 20 Arm D: patients receiving or requiring prophylaxis.  
40  
41 21

### 42 **Desmopressin testing (arm A)**

43  
44 23 In standard VWD care, most patients (except most type 2B VWD patients and all type 3 VWD  
45  
46 24 patients) undergo a desmopressin test to determine their individual response to desmopressin.

47  
48 25 In individuals who will undergo a desmopressin test, VWF:Act and FVIII response will be  
49  
50 26 predicted a priori based on the constructed population PK-model and individual patient  
51  
52 27 characteristics. During the desmopressin test, VWF:Act and FVIII will be measured before  
53  
54 28 desmopressin administration and at 1 hour and 3-4 hours after desmopressin administration  
55  
56  
57  
58  
59  
60

1 (0.3 µg/kg intravenously or subcutaneously or 300 µg (or 150 µg if body weight is <50 kg)  
 2 intranasally).

#### 3 4 **On demand treatment (arm B+C)**

5 During elective medical procedures and during bleeding episodes, we will aim for VWF:Act and  
 6 FVIII target plasma levels as defined in the national guidelines (table 1).<sup>13</sup> However, the treating  
 7 physician will be able to set specific VWF:Act and FVIII target levels if needed due to the  
 8 individuals' bleeding phenotype or severity of the medical procedure or bleed, as is standard  
 9 practice. These patient-specific target levels will be recorded prior to treatment and will be  
 10 communicated to the clinical pharmacologist performing PK modelling. The pharmacologist will  
 11 then provide a dosing strategy based on the patients' characteristics and individual  
 12 desmopressin test and/or VWF-containing concentrate PK profile (performed prior to the  
 13 procedure with the specific concentrate that will be used during the procedure), combined with  
 14 the population PK model for desmopressin or the specific concentrate. When, at any time  
 15 during the treatment period, target VWF:Act and FVIII plasma levels are not reached, additional  
 16 desmopressin and/or VWF-containing concentrate can be administered by the treating  
 17 physician to secure hemostasis. Therefore, bleeding risk for patients participating in the study  
 18 will not be higher than in patients treated according to standard protocol.

19  
 20 **Table 1** Guidelines for substitution with VWF-containing concentrate in VWD according to  
 21 Dutch national guidelines.

| Indication        | Target levels                                                                 |
|-------------------|-------------------------------------------------------------------------------|
| Dental extraction | FVIII:C and VWF:Act >0.50 IU/mL                                               |
| Surgery           | Prior to surgery and 36 hours postoperatively FVIII:C and VWF:Act >0.80 IU/mL |
| Major surgery     | FVIII:C >0.50 IU/mL during 7-10 days                                          |
| Minor surgery     | FVIII:C >0.50 IU/mL during 3 days and >0.30 IU/mL during 4-7 days             |

22 FVIII:C = Factor VIII activity; VWF:Act = von Willebrand factor activity

## 1 **Prophylaxis (D)**

2 In individuals receiving or requiring prophylaxis with a VWF-containing concentrate due to  
3 frequent bleeding episodes, patients will first undergo PK-profiling in order to determine the  
4 optimal dosage of VWF-containing concentrate on basis of VWF:Act or FVIII target trough and  
5 peak values as set by the treating physician and patients' individual PK parameters as derived  
6 by Bayesian analysis. Patients will initially receive PK-guided treatment for 12 weeks. During  
7 this period, plasma VWF:Act and FVIII will be measured and will be compared to predicted  
8 VWF:Act and FVIII to validate the advised dosing regimen. Information on bleeding episodes  
9 will be obtained from medical records. Participants will be followed up for a period of 24 weeks  
10 in which additional data will be collected in order to assess the association between plasma  
11 VWF:Act and FVIII concentrations and bleeding events.

## 14 **Individual pharmacokinetic profiling**

15 For every patient in arm B, C and D, an individualized dosing strategy will be provided based on  
16 body weight, type and severity of the procedure or bleeding, target VWF:Act and FVIII, baseline  
17 VWF:Act and FVIII and, if possible, an individual PK profile. Patients who will undergo an  
18 procedure requiring VWF-containing concentrate and patients who will receive prophylaxis, will  
19 undergo PK profiling with the VWF-containing concentrate of choice. Blood sampling for VWF  
20 and FVIII will be performed directly before bolus infusion and at approximately 10 minutes, 2 to  
21 6 hours, 24 hours and 48 hours after infusion.

## 23 **Population PK models**

24 Population PK models for desmopressin and different VWF-containing concentrates have been  
25 constructed using NONMEM<sup>®</sup> software (not all models have been published yet)<sup>9 10</sup>. These  
26 models are able to predict average PK parameters for VWF:Act and FVIII in a population  
27 individuals with VWD and low VWF as well as the inter-individual variability of these PK  
28 parameters, and intra-individual variability of some of the PK parameters.

1  
2  
3 1 In these PK models, the relationship between different patient factors and treatment  
4 factors, i.e. age, sex, weight, baseline VWF and FVIII, blood group type and VWF levels and PK  
5 2 parameters are described. This allows a priori prediction of the PK of VWF:Act and/or FVIII after  
6 3 desmopressin and VWF-containing concentrate administration. Combining an individual PK  
7 4 profile with the population PK model will allow for better prediction of the required doses and  
8 5 dosing frequency and also better prediction of plasma coagulation factor levels than prediction  
9 6 based on the population PK model alone.  
10 7  
11 8  
12 9

### 13 **Primary endpoints**

14 10 Arm A (desmopressin testing): predictive performance of the desmopressin population PK  
15 11 model: reliability of predicted VWF:Act and FVIII levels, defined as the difference between  
16 12 predicted and actual VWF:Act and FVIII levels.  
17 13

18 14 Arm B (elective medical procedures requiring treatment with desmopressin and/or VWF-  
19 15 containing concentrate): predictive performance of the Bayesian adaptive approach using the  
20 16 population PK model for desmopressin and/or VWF-containing concentrate, i.e. reliability of  
21 17 the predicted VWF:Act and FVIII levels, defined as the difference between predicted and actual  
22 18 VWF:Act and FVIII levels achieved after dosing.  
23 19

24 20 Arm C (bleeding episode requiring treatment with desmopressin or VWF-containing  
25 21 concentrate): predictive performance of the respective population PK models, i.e. reliability of  
26 22 the predicted VWF:Act and FVIII levels, defined as the difference between predicted and actual  
27 23 VWF:Act and FVIII levels achieved after dosing.  
28 24

29 25 Arm D (prophylactic treatment with a VWF-containing concentrate): predictive performance of  
30 26 the VWF-containing concentrate population PK models, i.e. reliability of the predicted VWF:Act  
31 27 and FVIII levels, defined as the difference between predicted and actual VWF:Act and FVIII  
32 28 levels achieved after dosing.  
33 29

## 1 **Secondary endpoints**

2 (Only in arm B, C and D): number and timing of desmopressin administrations (desmopressin  
3 dose will be standardized at 0.3 µg/kg) and/or timing and dosing of VWF-containing  
4 concentrate infusions.

5 (Only in arm B, C and D): hemostasis quantified by: hemoglobin levels, blood loss (ml),  
6 incidence of bleeds, incidence of thrombosis, and need for blood transfusion and/or re-  
7 operation because of bleeding.

8 (Only in arm B & C): duration of hospitalization (days), number of clinical visits.

9 (Only in arm B, C and D): Feasibility of the procedure with regard to patient and physician  
10 satisfaction and economic impact.

11 (Only in case of desmopressin testing or desmopressin treatment): desmopressin plasma  
12 concentrations.

13

## 14 **Sample size**

15 In this prospective study, we will explore the predictive performance of the constructed  
16 population PK models for desmopressin and VWF-containing concentrates. In bleeding and  
17 surgery, we will aim for VWF:Act and FVIII target trough levels (defined as 100-125% of  
18 VWF:Act and FVIII target trough level as stated by the treating physician and according to the  
19 national guidelines).

20 It is not common practice to calculate a sample size for prognostic models, and to our  
21 knowledge it is not possible to calculate a sample size for the determination of predictive  
22 performance, our primary outcome. However, as characteristics such as age, sex and disease  
23 type are not part of the inclusion criteria or exclusion criteria, the study population will be a  
24 reflection of the heterogeneous 'real life' VWD and low VWF population. Consequently, this will  
25 increase the 'effective sample size' of our study population.

26 To be able to provide an estimation of the sample size needed, we have calculated  
27 sample sizes for outcomes that may be seen as surrogates for the primary outcome. Based on a  
28 random sample (n=100) of our retrospective cohort of patients whom underwent a  
29 desmopressin test, we have constructed an average VWF:Act-after-desmopressin curve with

1 25% percentiles. In 81% of individual desmopressin tests, one or more time points fall outside  
2 of the 50% confidence interval of this average curve. Data from our retrospective cohort study  
3 on perioperative treatment with a VWF-containing concentrate (Haemate P®) show that in the  
4 total study population, 81% of FVIII trough levels in the first 36 hours was >0.20 IU/mL higher  
5 than targeted<sup>4</sup>. Using adaptive Bayesian dosing, we estimate that we can decrease the  
6 percentage in both groups from 81% to <50%. To determine this with an alpha of 0.02 and a  
7 power of 90%, we will have to include at least 25 patients in the desmopressin test group and  
8 at least 25 patients in the perioperative VWF-containing concentrate group. To allow for  
9 dropouts, at least 30 patients will be included in the desmopressin test group, and 30 patients  
10 will be included in the perioperative VWF-containing concentrate group. For desmopressin  
11 treatment during medical procedures, scarce data is available on factor levels during the  
12 periprocedural period. However, as we will also use the desmopressin test PK model in this  
13 setting, we assume similarity to the desmopressin test group and will also include 30 patients.

14 To explore the applicability of the currently available population PK models in other  
15 settings, predictive performance of the population PK models and PK-guided dose adjustments  
16 in groups for which no retrospective data is available, will be tested. Only small numbers of  
17 patients are currently treated with desmopressin in combination with VWF-containing  
18 concentrate, and it is expected that inclusion of patients with acute bleeding will be logistically  
19 challenging. Therefore, we aim for the inclusion of 10 patients who will receive a combination  
20 of desmopressin and VWF-containing concentrate during a medical procedure, 10 patients with  
21 a bleeding episode receiving treatment with desmopressin and 10 patients with a bleeding  
22 episode receiving treatment with VWF-containing concentrate. As very few patients in the  
23 Netherlands receive prophylaxis, we aim to include 3-5 patients in arm D. In these settings, the  
24 population PK models for treatment with desmopressin and VWF-containing concentrate will  
25 be combined, and we will extrapolate the perioperative PK models to bleeding and prophylaxis.

26

## 27 **Data analysis plan**

### 28 ***Primary study parameters***

29

30

31

32

33

34

35

36

37



1  
2  
3 1 Predictive performance of the population PK models, defined as difference between predicted  
4 and actual FVIII and VWF:Act levels achieved after dosing will be analyzed using Bland Altman  
5 analysis.<sup>14</sup> Mean relative error (MRE) will be calculated to determine accuracy and root mean  
6 squared error (RMSE) will be calculated to determine precision.  
7  
8  
9

### 10 5 11 12 6 **Secondary study parameters**

- 13  
14  
15 7 1. In case of perioperative treatment with VWF-containing concentrate (n = 30): concentrate  
16 consumption (IU/kg) from 24 hours before surgery until stop of VWF-containing  
17 concentrate infusions will be compared to consumption in the retrospective treatment  
18 cohort, of which the data have already been published. If patients underwent >1 surgical  
19 procedure, only the first one will be used for analysis. The distribution of outcomes for the  
20 prospectively studied group will be tested for normality using the Shapiro-Wilk test. In case  
21 of a non-significant (p >0.05) result of this test, the t-test will be used for the comparison of  
22 the primary endpoint. In case the resulting p-value for the Shapiro-Wilk test is equal or less  
23 than 0.05, the Wilcoxon-rank sum test will be used. The level for significance for this  
24 analysis will be set at two-sided p <0.05. Number and timing of desmopressin infusions will  
25 be defined quantitatively.  
26  
27  
28  
29  
30  
31  
32  
33  
34  
35 18 2. In the perioperative group, hemostasis will be quantified by amount of blood loss (mL).  
36 Bleeding complications or thrombotic complications will be defined quantitatively.  
37  
38  
39 20 3. In the perioperative group, duration of hospitalization (days) will be defined quantitatively.  
40  
41 21 4. Feasibility of the procedure: patient and physician satisfaction during PK-guided treatment  
42 during surgery and bleeding will be measured using a 10-point VAS (visual-analogue scale)  
43 questionnaire and will be defined quantitatively. Economic evaluation will be performed  
44 from a health care perspective taking all health care costs (a.o. costs of medication,  
45 hospitalization costs) into account.  
46  
47  
48  
49  
50 26 5. To test the correlation between desmopressin concentrations and relative increase in FVIII  
51 and VWF levels during desmopressin tests, and during desmopressin treatment during  
52 surgery or bleeding, the Pearson correlation coefficient will be calculated.  
53  
54  
55  
56  
57  
58  
59  
60

1

## 2 **Patient and public involvement**

3 During development of all OPTI-CLOT studies, we work closely together with The Netherlands  
4 Hemophilia Patient Society (NVHP). A member of the NVHP is also a member of the OPTI-CLOT  
5 study group and plays an advisory role in developing the studies within the consortium. The  
6 final results of the study will be communicated through international scientific journals and at  
7 international conferences. In addition, a layman summary of the results of this study will be  
8 published in the NVHP magazine. Lastly, the results of the study will be implemented in  
9 treatment guidelines and patient information will be adjusted accordingly.

10

## 11 **Ethics and dissemination**

12 The trial protocol was approved by the Medical Ethics Committee of the Erasmus MC,  
13 University Medical Center Rotterdam, the Netherlands. The study will be conducted according  
14 to good clinical practice (GCP) guidelines and the Declaration of Helsinki, and in accordance  
15 with the Dutch Medical Research Involving Humans Act (WMO). Written informed consent will  
16 be obtained from all participants by the investigator. Also, see online supplementary data for  
17 our regulations for data storage, amendments and compensation for injury. Results of the study  
18 will be communicated to the (inter)national medical and scientific community through  
19 publication in high-ranking peer-reviewed international journals and at (inter)national  
20 conferences. Results of the study will be implemented in the Dutch Haemophilia Treatment  
21 Guidelines and may also be adopted by international Haemophilia Treatment Societies.

22

## 23 **Data monitoring committee and serious adverse events**

24 Safety risks for participants are minimal as the VWF-containing concentrates and desmopressin  
25 used in this study are registered therapeutics for treatment of von Willebrand disease. To  
26 guarantee safety for participants in this study, VWF and FVIII levels will be monitored closely to  
27 prevent any additional bleeding risk. Therefore, a data safety monitoring board is not needed.

28

29

30

31

32

33

34

1  
2  
3 1 Serious adverse events (SAE) will be communicated to the sponsor within 24 hours. The  
4 sponsor will register the SAE within 15 days on ToetsingOnline, the Dutch registration system  
5 for SAEs.  
6  
7  
8  
9

#### 10 **REGISTRATION**

11  
12 6 The trial is registered at the Netherlands Trial Register, number NL7212  
13 ([www.trialregister.nl/trial/7212](http://www.trialregister.nl/trial/7212)) and to EudraCT with number 2018-001631-46.  
14  
15  
16  
17

#### 18 **ACKNOWLEDGEMENTS**

19  
20 10 The authors would like to thank all patients, physicians and (research) nurses participating in  
21 the study, and the OPTI-CLOT research group for their support.  
22  
23  
24

#### 25 **FUNDING STATEMENT**

26  
27 14 This investigator-initiated research project was supported by the Innovation Fund of Health  
28 Care Insurance Companies (Innovatiefonds Zorgverzekeraars) in the Netherlands (project  
29 number 3216). The funder is not involved in the design or performance of the study and does  
30 not get any benefits from the study.  
31  
32  
33  
34  
35

#### 36 **AUTHOR STATEMENT**

37  
38 20 JH, RM and MHC designed the study. WAA, NdJ, LB, MEC, CZ and FL provided critical guidance  
39 during the design of the study. JH wrote the manuscript. All authors have read and approved  
40 the final manuscript.  
41  
42  
43  
44

#### 45 **COMPETING INTERESTS STATEMENT**

46  
47 25 JH has received an award from CSL Behring outside the submitted work. CZ had received  
48 research grants from Pfizer, Celgene, Daiichi-Sankyo and is a consultant for Incyte, Sanofi and  
49 Pfizer. FL has received unrestricted research grants from CSL Behring, Takeda and uniQure, and  
50 is consultant for Takeda, uniQure, and Biomarin. He is DSMB member for a study sponsored by  
51 Roche. RM has received travel grants from Shire and Bayer. MC has received grants from  
52  
53  
54  
55  
56  
57  
58  
59  
60

1  
2  
3 1 governmental research institutes such as NWO, ZonMW, Innovation fund, institutional grants  
4  
5 2 and unrestricted investigator research grants/educational and travel funding from the following  
6  
7 3 companies over the years: Pfizer, Baxter/Baxalta/Shire, Bayer Schering Pharma, CSL Behring,  
8  
9 4 Sobi Biogen, Novo Nordisk, Novartis and Nordic Pharma, and has served as a member on  
10  
11 5 steering boards of Roche, Bayer and Octapharma. The remaining authors declare no competing  
12  
13 6 financial interests. All unrestricted research grants, awards, educational grants and consultancy  
14  
15 7 fees of all authors were forwarded to the respective institutions.  
16  
17 8

### 9 **THE OPTI-CLOT STUDY GROUP**

10 Steering Committee, the Netherlands: M.H. Cnossen (principal Investigator and chair OPTI-  
11  
12 CLOT), F.W.G. Leebeek, Rotterdam; K. Fijnvandraat, R.A.A. Mathôt (co-investigator),  
13  
14 Amsterdam; K. Meijer, Groningen. Local principal investigators, other local collaborators the  
15  
16 Netherlands: M.J.H.A. Kruij, S. Polinder, Rotterdam; M. Coppens, Amsterdam; R.Y.J. Tamminga,  
17  
18 K. Meijer, Groningen; B.A.P. Laros-van Gorkom, P. Brons, S.E.M. Schols, Nijmegen; F.J.M. van  
19  
20 der Meer, H.C.J. Eikenboom, Leiden; R.E.G. Schutgens, K. Fischer, Utrecht; F. Heubel-Moenen,  
21  
22 Maastricht; L. Nieuwenhuizen, Veldhoven; P. Ypma, The Hague; M.H.E. Driessens, Nijkerk. Trial  
23  
24 bureau: C. M. Zwaan, I. van Vliet, Rotterdam. Principal investigators and local collaborators in  
25  
26 the United Kingdom: P. W. Collins, Cardiff; R. Liesner, P. Chowdary, London; D. Keeling, Oxford.  
27  
28 OPTI-CLOT PhDs: J. Lock, H.C.A.M. Hazendonk, I. van Moort, T. Preijers, J.M. Heijdra, N.C.B. de  
29  
30 Jager, M.C.H.J. Goedhart, L.H. Bukkems, W. Al Arashi, M.E. Cloesmeijer, A. Janssen.  
31  
32  
33  
34  
35  
36  
37  
38  
39  
40  
41  
42

### 42 **REFERENCES**

- 43 23 1. Leebeek FW, Eikenboom JC. Von Willebrand's Disease. *N Engl J Med* 2016;**375**(21):2067-80.
- 44 24 2. Sadler JE, Budde U, Eikenboom JCJ, et al. Update on the pathophysiology and classification of  
45 25 von Willebrand disease: A report of the Subcommittee on von Willebrand factor. *J*  
46 26 *Thromb Haemost* 2006;**4**(10):2103-14.
- 47 27 3. Lavin M, Aguila S, Schneppenheim S, et al. Novel insights into the clinical phenotype and  
48 28 pathophysiology underlying low VWF levels. *Blood* 2017;**130**(21):2344-53.
- 49 29 4. Hazendonk HCAM, Heijdra JM, de Jager NCB, et al. Analysis of current perioperative  
50 30 management with Haemate((R)) P/Humate P((R)) in von Willebrand disease: Identifying  
51 31 the need for personalized treatment. *Haemophilia* 2018.
- 52 32 5. Heijdra JM, Cnossen MH, Leebeek FWG. Current and Emerging Options for the Management  
53 33 of Inherited von Willebrand Disease. *Drugs* 2017.

- 1 6. Castaman G, Lethagen S, Federici AB, et al. Response to desmopressin is influenced by the  
2 genotype and phenotype in type 1 von Willebrand disease (VWD): results from the  
3 European Study MCMDM-1VWD. *Blood* 2008;**111**(7):3531-9.
- 4 7. Federici AB, Mazurier C, Berntorp E, et al. Biologic response to desmopressin in patients with  
5 severe type 1 and type 2 von Willebrand disease: results of a multicenter European  
6 study. *Blood* 2004;**103**(6):2032-8.
- 7 8. Lethagen S, Kyrle PA, Castaman G, et al. von Willebrand factor/factor VIII concentrate  
8 (Haemate® P) dosing based on pharmacokinetics: A prospective multicenter trial in  
9 elective surgery. *J Thromb Haemost* 2007;**5**(7):1420-30.
- 10 9. de Jager NCB, Bukkems LH, Heijdra JM, et al. One piece of the puzzle: Population  
11 pharmacokinetics of FVIII during perioperative Haemate P((R)) /Humate P((R))  
12 treatment in von Willebrand disease patients. *J Thromb Haemost* 2020;**18**(2):295-305.
- 13 10. de Jager NCB, Heijdra JM, Kieboom Q, et al. Population Pharmacokinetic Modeling of von  
14 Willebrand Factor Activity in von Willebrand Disease Patients after Desmopressin  
15 Administration. *Thromb Haemost* 2020;**120**(10):1407-16.
- 16 11. Mentré F, Mallet A. Handling covariates in population pharmacokinetics. *Int J Biomed*  
17 *Comput* 1994;**36**(1-2):25-33.
- 18 12. Dargaud Y, Delavenne X, Hart DP, et al. Individualized PK-based prophylaxis in severe  
19 haemophilia. *Haemophilia* 2018;**24 Suppl 2**:3-17.
- 20 13. De Wee EM, Leebeek FWG, Eikenboom JCJ. Diagnosis and management of von Willebrand  
21 Disease in the Netherlands. *Semin Thromb Hemost* 2011;**37**(5):480-87.
- 22 14. Myles PS, Cui J. Using the Bland-Altman method to measure agreement with repeated  
23 measures. *Br J Anaesth* 2007;**99**(3):309-11.

24

**Supplementary data**

1. Steering committee
2. List of participating centers and principal investigators
3. Monitoring and safety assurance
4. Handling and storage of data and documents
5. Amendments
6. Compensation for injury
7. Access to final trial dataset
8. Model for patient information and informed consent form (Dutch only).

## 1. Steering committee

### Coordinating investigator / project leader:

Dr. M.H. Cnossen, Pediatric Hematologist

Department of Pediatric Hematology, Erasmus MC – Sophia Children’s Hospital, University Medical Center Rotterdam, Rotterdam, the Netherlands

Email: [m.cnossen@erasmusmc.nl](mailto:m.cnossen@erasmusmc.nl)

### Co-project leader:

Prof. Dr. R.A.A. Mathôt, Hospital Pharmacist – Clinical Pharmacologist

Hospital Pharmacy – Clinical Pharmacology, Amsterdam UMC, University of Amsterdam, Amsterdam, the Netherlands

[r.mathot@amsterdamumc.nl](mailto:r.mathot@amsterdamumc.nl)

### Principal investigators:

See 2. List of participating centers and principal investigators

### Sponsor:

Prof. Dr. E.H.H.M. Rings, Head of Department of Pediatrics,

Erasmus MC- Sophia Children’s Hospital, University Medical Center Rotterdam, Rotterdam, the Netherlands

[e.rings@erasmusmc.nl](mailto:e.rings@erasmusmc.nl)

## 2. List of Participating Centers

Erasmus MC, University Medical Center Rotterdam, Rotterdam, the Netherlands

PI: Dr. M.H. Cnossen ([m.cnossen@erasmusmc.nl](mailto:m.cnossen@erasmusmc.nl))

Radboud University Medical Center, Nijmegen, the Netherlands

PI: Dr. S.E.M. Schols ([saskia.schols@radboudumc.nl](mailto:saskia.schols@radboudumc.nl))

University Medical Center Groningen, Groningen, the Netherlands

PI: Prof. Dr. K. Meijer ([k.meijer@umcg.nl](mailto:k.meijer@umcg.nl))

Amsterdam University Medical Center, Amsterdam, the Netherlands

PI: Prof. Dr. C.J. Fijnvandraat ([c.j.fijnvandraat@erasmusmc.nl](mailto:c.j.fijnvandraat@erasmusmc.nl))

Maastricht University Medical Center, Maastricht, the Netherlands

PI: Drs. F. Heubel-Moenen ([floor.moenen@mumc.nl](mailto:floor.moenen@mumc.nl))

Haga Hospital, The Hague, the Netherlands

PI: Dr. P. Ypma ([p.ypma@hagaziekenhuis.nl](mailto:p.ypma@hagaziekenhuis.nl))

Maxima Medical Center, Veldhoven, the Netherlands

PI: Dr. L. van Nieuwenhuizen ([laurens.nieuwenhuizen@mmc.nl](mailto:laurens.nieuwenhuizen@mmc.nl))



### 3. Handling and storage of data and documents

All data will be handled confidentially and will be filed in a coded database. A study number will be appointed to every patient. Individual patients can only be identified by participating investigators at the different sites by this number in combination with their hospital registration number. Handling of data will be done according to the Dutch Personal Data Protection Act. Blood samples will be handled confidentially and will be stored in the hemostasis laboratory in the Erasmus MC. Within a few weeks after discharge of a patient, a member of the study team will make an appointment to collect the blood samples. The samples will be stored for 15 years (and returned to the site, if demanded so by specific site-regulations).

#### 4. Monitoring and quality assurance

The risk for participating patients is minimal. Daily monitoring of plasma levels and subsequent adjustment of VWF-containing concentrate dosing according to the Dutch Hemophilia Consensus target levels, will ensure adequate FVIII and VWF levels to prevent bleeding. By following the Consensus, this therapeutic study poses no additional risk to the patients. Safety and quality of the study will be monitored once yearly at every participating site by an auditor independent from the sponsor and investigators.

For peer review only

## 5. Amendments

Amendments are changes made to the research after a favourable opinion by the accredited METC has been given. All amendments will be notified to the METC that gave a favourable opinion.

A 'substantial amendment' is defined as an amendment to the terms of the METC application, or to the protocol or any other supporting documentation, that is likely to affect to a significant degree:

- the safety or physical or mental integrity of the subjects of the trial;
- the scientific value of the trial;
- the conduct or management of the trial; or
- the quality or safety of any intervention used in the trial.

All substantial amendments will be notified to the METC and to the competent authority.

Non-substantial amendments will not be notified to the accredited METC and the competent authority, but will be recorded and filed by the sponsor.

All amendments will be communicated to all participating centers by the trial coordinator.

Changes regarding inclusion and exclusion criteria or study design, will also be communicated to [www.trialregister.nl](http://www.trialregister.nl) (NL7212).

## 6. Compensation for injury

The sponsor/investigator has a liability insurance which is in accordance with article 7, subsection 9 of the WMO. The sponsor/investigator has a liability insurance which is in accordance with article 7 of the WMO. The sponsor (also) has an insurance which is in accordance with the legal requirements in the Netherlands (Article 7 WMO). This insurance provides cover for damage to research subjects through injury or death caused by the study. The insurance applies to the damage that becomes apparent during the study or within 4 years after the end of the study.

For peer review only

## 7. Access to final trial dataset

The sponsor of the OPTI-CLOT: To WiN study will have access to the final dataset and will be the owner of all study data. However, all participating centers have access to their own data and will have permission to use these data for non-commercial research within their own center and to improve patient care. All publications regarding the OPTI-CLOT: To WiN study will be coordinated by the project leader. Other centers than the sponsor site may only publish data after permission from the sponsor and if the sponsor is not publishing the data within a fair amount of time after the study and data analysis has ended. All participating centers have contractual agreements with the sponsor regarding these matters.

## 8. Model for patient information and informed consent form.

# Proefpersoneninformatie voor deelname aan medisch-wetenschappelijk onderzoek

### **Onderzoek naar de effecten van farmacokinetische modellen bij het doseren DDAVP en/of stollingsfactorconcentraten bij patiënten met de ziekte van von Willebrand bij medische interventies**

---

Officiële titel: Implementatie van farmacokinetisch gestuurd doseren van DDAVP en VWF-bevattende stollingsfactorconcentraten bij von Willebrandziekte ("OPTI-CLOT: To-WiN")

#### **Informatie voor een patiënt met de ziekte van von Willebrand (≥16 jaar)**

Geachte heer/mevrouw,

Wij vragen u om mee te doen aan een medisch-wetenschappelijk onderzoek.

Meedoen is vrijwillig. Om mee te doen is wel uw schriftelijke toestemming nodig. U ontvangt deze brief omdat u de ziekte van Von Willebrand heeft en u binnenkort een ingreep ondergaat.

Voordat u beslist of u wilt meedoen aan dit onderzoek, krijgt u uitleg over wat het onderzoek inhoudt. Lees deze informatie rustig door en vraag de onderzoeker uitleg als u vragen heeft. U kunt ook de onafhankelijk deskundige, die aan het eind van deze brief genoemd wordt, om aanvullende informatie vragen. U kunt er ook over praten met uw partner, vrienden of familie.

Verdere informatie over meedoen aan zo'n onderzoek staat op de website van de Rijksoverheid: [www.rijksoverheid.nl/mensenonderzoek](http://www.rijksoverheid.nl/mensenonderzoek).

#### **Algemene informatie**

Dit onderzoek is opgezet door het Erasmus MC en wordt gedaan door artsen in verschillende ziekenhuizen in Nederland. Er zullen naar verwachting 120 proefpersonen meedoen; zowel volwassenen als kinderen van alle leeftijden. De medisch-ethische toetsingscommissie heeft dit onderzoek goedgekeurd. Algemene informatie over de toetsing van onderzoek vindt u op de website van de Rijksoverheid: [www.rijksoverheid.nl/mensenonderzoek](http://www.rijksoverheid.nl/mensenonderzoek).

#### **1. Doel van het onderzoek**

Het doel van dit onderzoek is uitzoeken of een nieuwe manier van doseren (doseren op basis van farmacokinetische modellen, ook wel PK-modellen genoemd) van DDAVP en/of stollingsfactorconcentraat toepasbaar is in de praktijk. Deze PK-modellen zullen daarom onderzocht worden in verschillende situaties: tijdens DDAVP-testen, bij de behandeling van bloedingen, en bij de

1  
2  
3 behandeling rondom medische ingrepen (zoals operatie, tandheelkundig ingreep, kijkonderzoek van  
4 darm en bevalling in het ziekenhuis).

## 6 7 **2. Achtergrond van het onderzoek**

8 Patiënten met de ziekte van Von Willebrand worden rondom medische ingrepen behandeld met DDAVP  
9 en/of een stollingsfactorconcentraat. Deze medicatie wordt tot nu toe op grond van het  
10 lichaamsgewicht gedoseerd. Echter, de medicatie gedraagt zich bij elke persoon verschillend. Dit wordt  
11 grotendeels bepaald door hoe het lichaam met het medicijn omgaat. Dit wordt “farmacokinetiek” (PK)  
12 genoemd. Op basis van gegevens van patiënten die eerder met deze medicatie zijn behandeld, zijn PK-  
13 modellen gemaakt. Met deze modellen is het mogelijk geworden om een beter inzicht te krijgen in hoe  
14 het lichaam van verschillende patiënten met het medicijn om zal gaan. In de toekomst kunnen wij  
15 hiermee per persoon voorspellen hoe vaak en in welke dosering de medicatie gegeven moet worden.  
16 Hiermee voorkomen we dat we óf te weinig, óf te veel medicatie geven.

## 21 22 **3. Wat meedoen inhoudt**

23 Als u meedoet, duurt dat totaal enkele dagen tot weken voor u, afhankelijk van het soort behandeling.

### 25 26 **Behandeling**

27 Rondom de ingreep die u zult ondergaan, wordt u behandeld met DDAVP en/of  
28 stollingsfactorconcentraat. De keuze voor het soort medicatie wordt bepaald door uw behandelend arts  
29 (hematoloog) en is hetzelfde als wanneer u niet zou meedoen aan het onderzoek. Als u meedoet aan  
30 het onderzoek zal op een andere, specifiekere manier bepaald worden hoeveel van het medicijn u krijgt  
31 en hoe vaak. In dit onderzoek zal dit worden berekend op basis van uw persoonlijke gegevens en uw  
32 persoonlijke PK-profiel, gecombineerd met het algemene PK-model. Dit verschilt van de normale  
33 situatie, waarin de dosis op basis van uw lichaamsgewicht wordt bepaald.

37 Omdat de ingreep die u zult ondergaan pas over enige tijd zal plaatsvinden, geeft dit gelegenheid om bij  
38 u van tevoren een persoonlijk PK-profiel op te stellen. Hierbij worden als u behandeld wordt met  
39 DDAVP, indien mogelijk, de gegevens van een eerdere DDAVP-test gebruikt. U hoeft dan niet extra naar  
40 het ziekenhuis te komen. In de andere gevallen (als u geen bruikbare DDAVP test heeft en behandeling  
41 met DDAVP moet ondergaan, of als u een behandeling met stollingsfactorconcentraat gaat krijgen)  
42 willen wij graag een testdosis van de medicatie toedienen en op meerdere momenten bloed bij u  
43 afnemen om het persoonlijke PK-profiel te maken.

### 47 48 **Bezoeken en metingen**

49 Naast de gebruikelijke handelingen die worden gedaan ter voorkoming van een bloeding rondom de  
50 ingreep, zult u in het kader van het onderzoek eenmalig gewogen worden, en er wordt een “lean body  
51 mass” meting gedaan (meting van de vetvrije massa van het lichaam).

1  
2  
3 Er wordt extra bloed afgenomen om de hoeveelheid stollingsfactoren in uw bloed te bepalen en  
4 mogelijk krijgt u een testdosis DDAVP en/of stollingsfactorconcentraat toegediend. Het kan zijn dat u  
5 hiervoor extra naar het ziekenhuis moet komen.  
6

7  
8 Voor een schematisch overzicht van de onderzoekshandelingen, zie **bijlage C**: overzicht  
9 onderzoekshandelingen.  
10

#### 11 **4. Wat wordt er van u verwacht**

  
12

13 Om het onderzoek goed te laten verlopen, is het belangrijk dat u zich aan de volgende afspraken houdt.  
14

15 De afspraken zijn dat u:

- 16 - niet ook nog aan een ander medisch-wetenschappelijk onderzoek meedoet.
- 17 - afspraken voor bezoeken nakomt.  
18  
19  
20

21 Het is belangrijk dat u contact opneemt met de onderzoeker:

- 22 - voordat u andere geneesmiddelen gaat gebruiken. Ook als dat homeopathische  
23 geneesmiddelen, natuurgeneesmiddelen, vitaminen en/of geneesmiddelen van de drogist zijn.
- 24 - als u in een ziekenhuis wordt opgenomen of behandeld.
- 25 - u plotseling gezondheidsklachten krijgt.
- 26 - u een bloeding krijgt na de ingreep.
- 27 - u niet meer wilt meedoen aan het onderzoek.
- 28 - als uw contactgegevens wijzigen.  
29  
30  
31  
32

#### 33 **Zwangerschap**

  
34

35 Bent u zwanger, of wordt u zwanger tijdens het onderzoek? Laat dit dan direct weten aan uw behandeld  
36 arts. Hij/zij zal dan beslissen of uw behandeling moet worden aangepast.  
37

#### 38 **5. Mogelijke bijwerkingen/complicaties en ongemakken**

  
39

40 Het geneesmiddel dat u tijdens het onderzoek krijgt, is hetzelfde middel als dat u krijgt als u niet  
41 meedoet aan het onderzoek. Er zijn daarom geen andere bijwerkingen te verwachten dan tijdens de  
42 standaard behandeling rondom een ingreep.  
43  
44

#### 45 **Metingen**

  
46

47 Bij de eenmalige "lean body mass" meting ligt u op de onderzoeksbank, waarna er een sticker met  
48 elektrode op uw hand en voet geplakt wordt. Op deze elektroden wordt een apparaatje aangesloten,  
49 waarop de onderzoeker de gegevens over uw lichaamssamenstelling kan aflezen. Dit onderzoek is niet  
50 pijnlijk.  
51  
52

53 Bloedafnames kunnen pijn doen of een bloeduitstorting geven. Alles bij elkaar nemen we, afhankelijk  
54 van welk geneesmiddel u krijgt, tussen de 60 en 80 ml extra bloed bij u af. Deze hoeveelheid geeft geen  
55 problemen. Ter vergelijking: bij de bloedbank wordt 500 ml per keer afgenomen.  
56  
57  
58  
59  
60



## 6. Mogelijke voor- en nadelen

Het is belangrijk dat u de mogelijk voor- en nadelen goed afweegt voordat u besluit mee te doen.

U heeft zelf geen direct voordeel van dit onderzoek. Voor de toekomst kan het onderzoek wel nuttige gegevens opleveren. Mogelijk krijgt u door mee te doen aan het onderzoek een dosering van het geneesmiddel die beter bij uw lichaam past, waardoor wordt voorkomen dat er te veel of te weinig wordt gegeven rondom een ingreep. Dit kan een voordeel opleveren. Zoals gebruikelijk worden de waarden van de stollingsfactoren in uw bloed nauwkeurig gecontroleerd, waardoor u geen gevaar loopt en de behandelaar steeds op de hoogte is of u voldoende van het geneesmiddel krijgt toegediend om bloedingen te voorkomen. Wanneer wij besluiten om bij elke patiënt in de toekomst een farmacokinetisch model te maken voor de ingreep, kunnen we de in dit onderzoek verzamelde gegevens mogelijk in de toekomst voor uw behandeling gebruiken en hoeft u dan niet extra te worden geprikt. Dit kan ook een voordeel zijn.

Nadelen van meedoen aan het onderzoek kunnen zijn:

- mogelijke ongemakken van de metingen in het onderzoek (zie punt 5)

Deelname aan het onderzoek betekent ook:

- dat u extra tijd kwijt bent;
- extra bloedafnames;
- dat u mogelijk meerdere keren extra naar het ziekenhuis moet komen;
- dat u afspraken heeft waaraan u zich moet houden

Al deze zaken zijn hiervoor onder punt 3, 4 en 5 beschreven.

## 7. Als u niet wilt meedoen of wilt stoppen met het onderzoek

U beslist zelf of u meedoet aan het onderzoek. Deelname is vrijwillig. Als u niet wilt meedoen, wordt u rondom de ingreep op de gebruikelijke manier behandeld voor uw von Willebrandziekte, en de geneesmiddelen zullen op de gebruikelijke manier gedoseerd worden. De onderzoeker kan u meer vertellen over de behandelingsmogelijkheden die er zijn en de voor- en nadelen daarvan.

Als u wel meedoet, kunt u zich altijd bedenken en toch stoppen, ook tijdens het onderzoek. U wordt dan weer op de gebruikelijke manier behandeld voor uw von Willebrandziekte. U hoeft niet te zeggen waarom u stopt. Wel moet u dit direct melden aan de onderzoeker. De gegevens die tot dat moment zijn verzameld, worden gebruikt voor onderzoek. Als u wilt, kan verzameld lichaamsmateriaal worden vernietigd.

Als er nieuwe informatie over het onderzoek is die belangrijk voor u is, laat de behandelend arts dit aan u weten. U wordt dan gevraagd of uw blijft meedoen.

## 8. Einde van het onderzoek

Uw deelname aan het onderzoek stopt als

- alle bezoeken en bloedafnames volgens het schema voorbij zijn
- u zelf kiest om te stoppen
- de onderzoeker het beter voor u vindt om te stoppen
- de overheid of de beoordelende medisch-ethische toetsingscommissie besluit om het onderzoek te stoppen

Het hele onderzoek is afgelopen als alle deelnemers klaar zijn. Na het verwerken van alle gegevens informeert de onderzoeker u over de belangrijkste uitkomsten van het onderzoek.

## 9. Gebruik en bewaren van uw gegevens en lichaamsmateriaal

Voor dit onderzoek worden uw persoonsgegevens en lichaamsmateriaal verzameld, gebruikt en bewaard. Het gaat om gegevens zoals naam, adres, geboortedatum en om gegevens over uw gezondheid. Het gaat bij dit onderzoek om uitslagen van bloed. Gebruik en bewaring van uw gegevens en lichaamsmateriaal is nodig om de wetenschappelijke vraagstelling van dit onderzoek te kunnen beantwoorden en over de resultaten te publiceren. U wordt gevraagd om hiervoor toestemming te geven. Als u dat niet wilt, kunt u niet deelnemen aan dit onderzoek.

### Vertrouwelijkheid van uw gegevens en lichaamsmateriaal

Om uw privacy te beschermen, worden uw gegevens en het lichaamsmateriaal voorzien van een code. De naam en andere gegevens die u direct kunnen identificeren worden apart bewaard. Alleen met de sleutel van de code zijn gegevens tot u te herleiden. De sleutel van de code blijft bij de onderzoeker. Naar de sponsor/opdrachtgever en andere bij het onderzoek betrokken partijen worden uw gegevens en lichaamsmateriaal alleen onder die code verstuurd. Ook in rapporten en publicaties over het onderzoek worden alleen de gecodeerde gegevens van u vermeld.

### Controle en inzage in uw gegevens

Sommige personen en instanties moeten inzage kunnen hebben in al uw gegevens. Ook in de gegevens zonder code. Dit is nodig om te kunnen controleren of het onderzoek goed en betrouwbaar is uitgevoerd. Personen en instanties die ter controle toegang krijgen tot uw gegevens: medewerkers van het onderzoeksteam, de veiligheidscommissie die het onderzoek in de gaten houdt, een controleur die door de opdrachtgever van het onderzoek is ingehuurd, nationale en internationale toezichthoudende autoriteiten, bijvoorbeeld de Inspectie Gezondheidszorg en Jeugd.

Zij zullen uw gegevens geheim houden. U wordt gevraagd voor deze inzage toestemming te geven. Indien u dat niet wilt, kunt u niet deelnemen aan dit onderzoek.

### **Bewaartermijn gegevens en lichaamsmateriaal**

Op de onderzoekslocatie (het ziekenhuis) en bij de opdrachtgever worden uw gegevens gedurende de wettelijk voorgeschreven termijn bewaard, de wettelijk voorgeschreven termijn is 15 jaar.

Het van u verkregen lichaamsmateriaal wordt niet onmiddellijk na analyse vernietigd. Uw lichaamsmateriaal wordt bewaard om in de loop van dit onderzoek daarop nog nieuwe analyses/bepalingen te kunnen doen.

### **Bewaring en gebruik van gegevens en lichaamsmateriaal voor ander onderzoek**

Na afloop van dit onderzoek kunnen uw gegevens en lichaamsmateriaal nog van belang zijn voor het uitvoeren van ander onderzoek. U wordt gevraagd toestemming te geven voor dit langer bewaren en voor gebruik in ander, toekomstig, onderzoek op het gebied van uw aandoening. Indien u dat niet wilt, kunt u gewoon deelnemen aan het huidige onderzoek.

### **Informatie over onverwachte bevindingen**

Tijdens dit onderzoek kan er bij toeval iets gevonden worden dat niet van belang is voor het onderzoek maar wel voor u. Als dit belangrijk is voor uw gezondheid, dan zal je op de hoogte worden gesteld door de onderzoeker. U kunt dan met de behandelend arts bespreken wat er gedaan moet worden. Ook hiervoor geeft u toestemming.

### **Intrekken toestemming**

U kunt uw toestemming altijd weer intrekken, voor wat betreft dit onderzoek en voor wat betreft het toekomstig onderzoek. De reeds over u verzamelde gegevens zullen dan nog wel worden gebruikt in het onderzoek. Uw lichaamsmateriaal zal na intrekking van uw toestemming worden vernietigd. Als er al metingen in dat lichaamsmateriaal zijn gedaan, dan worden de resultaten nog wel gebruikt in het onderzoek. Indien u wilt dat al de gegevens over u worden verwijderd, dan kunt u daarom verzoeken.

### **Meer informatie over de rechten bij verwerking van gegevens**

Voor meer informatie over de naleving van uw rechten bij de verwerking van uw persoonsgegevens kunt u contact opnemen met de verantwoordelijke voor de verwerking van jouw persoonsgegevens. Voor dit onderzoek is het Erasmus MC is verantwoordelijk voor de naleving van de regels voor de verwerking van uw persoonsgegevens.

Bij vragen of klachten over de verwerking van uw persoonsgegevens raden we u aan eerst contact op te nemen met de onderzoekslocatie. U kunt ook contact opnemen met de Functionaris voor de Gegevensbescherming van de instelling of de Autoriteit Persoonsgegevens. Voor contactgegevens zie bijlage A.

Meer informatie over uw rechten bij de verwerking van uw persoonsgegevens kunt u vinden op de website van de Autoriteit Persoonsgegevens:

1  
2  
3 ([https://autoriteitpersoonsgegevens.nl/nl/onderwerpen/avg-nieuweeuropese-](https://autoriteitpersoonsgegevens.nl/nl/onderwerpen/avg-nieuweeuropese-privacywetgeving/controle-over-je-data)  
4 [privacywetgeving/controle-over-je-data](https://autoriteitpersoonsgegevens.nl/nl/onderwerpen/avg-nieuweeuropese-privacywetgeving/controle-over-je-data)).  
5

## 6 **Registratie van het onderzoek**

7  
8 Dit onderzoek staat ook in een overzicht van medisch-wetenschappelijke onderzoeken, namelijk op  
9  
10 [www.trialregister.nl](http://www.trialregister.nl). Deze website bevat geen informatie die herleidbaar is tot u als persoon. Wel kan  
11 de website een samenvatting van de resultaten van dit onderzoek tonen. U vindt dit onderzoek onder  
12 "OPTI-CLOT: To WiN".  
13  
14

## 15 **10. Verzekering voor proefpersonen**

16  
17 Voor iedereen die meedoet aan dit onderzoek is een verzekering afgesloten. De verzekering dekt schade  
18 door het onderzoek. Niet alle schade is gedekt. In **bijlage B** vindt u meer informatie over de verzekering.  
19 Daar staat ook aan wie u schade kunt melden.  
20  
21

## 22 **11. Vergoeding voor meedoen**

23  
24 De extra testen en ziekenhuisbezoeken voor het onderzoek kosten u niets. U wordt niet betaald voor  
25 het meedoen aan dit onderzoek. Wel krijgt u een vergoeding voor de reis- en parkeerkosten als u naar  
26 het ziekenhuis komt voor het maken van een PK-profiel.  
27  
28

## 29 **12. Heeft u vragen?**

30  
31 Bij vragen kunt u contact opnemen met de onderzoeker of uw behandeld arts. Voor onafhankelijk advies  
32 over meedoen aan dit onderzoek kunt u terecht bij de onafhankelijke arts. Hij weet veel over het  
33 onderzoek, maar heeft niet te maken met dit onderzoek.  
34  
35

36  
37 Bij klachten kunt u het beste terecht bij de klachtenfunctionaris/-commissie van uw ziekenhuis. Alle  
38 gegevens vindt u in **bijlage A**: Contactgegevens.  
39

## 40 **13. Ondertekening toestemmingsformulier**

41  
42 Wanneer u voldoende bedenktijd heeft gehad, wordt u gevraagd te beslissen over deelname aan dit  
43 onderzoek. Indien u toestemming geeft, zullen wij u vragen deze op de bijbehorende  
44 toestemmingsverklaring schriftelijk te bevestigen. Door uw schriftelijke toestemming geeft u aan dat u  
45 de informatie heeft begrepen en instemt met deelname aan het onderzoek. Het handtekeningenblad  
46 wordt door de onderzoeker bewaard. U krijgt een kopie of een tweede exemplaar van deze  
47 toestemmingsverklaring.  
48  
49

50  
51  
52  
53 Met vriendelijke groet,

54  
55 De "OPTI-CLOT: To-WiN" onderzoeksgroep  
56  
57  
58  
59

1  
2  
3 **14. Bijlagen bij deze informatie**  
4

5 A. Contactgegevens  
6

7 B. Informatie over de verzekering  
8

9 C. Schema onderzoekshandelingen  
10

11 D. Toestemmingsformulier  
12  
13  
14  
15  
16  
17  
18  
19  
20  
21  
22  
23  
24  
25  
26  
27  
28  
29  
30  
31  
32  
33  
34  
35  
36  
37  
38  
39  
40  
41  
42  
43  
44  
45  
46  
47  
48  
49  
50  
51  
52  
53  
54  
55  
56  
57  
58  
59  
60

For peer review only

## Bijlage A: contactgegevens

### Contactgegevens Erasmus MC

Bij vragen of opmerkingen kunt u contact opnemen met drs. W. Al Arashi, arts-onderzoeker, via telefoonnummer 06-34861847 (studietelefoon OPTI-CLOT studies).

U kunt ook contact opnemen met de hoofdonderzoeker Dr. M.H. Cnossen, kinderarts-hematoloog, via telefoonnummer 010-7036691.

Of met een van de andere onderzoekers:

Artsen Hematologie: tel: 010-7030148.

Hemofilieverpleegkundigen: tel. 06-12623034.

### Onafhankelijk deskundige

Als u twijfelt over deelname aan dit onderzoek, dan kunt u ook een onafhankelijk arts raadplegen, die zelf niet bij het onderzoek betrokken is, maar wel deskundig is op dit gebied: Prof. dr. H.A.W.M. Tiddens, kinderarts, tel. 010-7036690.

Ook als u vragen voor of tijdens het onderzoek hebt die u liever niet aan de onderzoekers stelt kunt u contact opnemen met de onafhankelijk arts.

### Klachtencommissie

Als u niet tevreden bent over het onderzoek of de behandeling, dan kunt u terecht bij de onafhankelijke klachtencommissie van het ziekenhuis. U kunt zich dan wenden tot:

De secretaris van de klachtencommissie Erasmus MC

Postbus 2040

3000 CA Rotterdam

Tel. 010-7033198

### Functionaris Gegevensbescherming voor het Erasmus MC:

Dhr. P. van Hoogdalem

Bereikbaar via het secretariaat van de Afdeling Juridische Zaken, tel. 010-7034986.

## Bijlage B: informatie over de verzekering

Voor iedereen die meedoet aan dit onderzoek, heeft het Erasmus MC een verzekering afgesloten. De verzekering dekt schade door deelname aan het onderzoek. Dit geldt voor schade tijdens het onderzoek of binnen vier jaar na het einde ervan. Schade moet u binnen die vier jaar aan de verzekeraar hebben gemeld.

De verzekering dekt niet alle schade. Onderaan deze tekst staat in het kort welke schade niet wordt gedekt.

Deze bepalingen staan in het Besluit verplichte verzekering bij medisch-wetenschappelijk onderzoek met mensen. Dit besluit staat op [www.ccmo.nl](http://www.ccmo.nl), de website van de Centrale Commissie Mensgebonden Onderzoek (zie 'Bibliotheek' en dan 'Wet- en regelgeving').

Bij schade kunt u direct contact leggen met de verzekeraar.

De verzekeraar van het onderzoek is:

Naam: CNA Insurance Company Limited

Adres: Strawinskylaan 703, 1077 XX Amsterdam

Telefoonnummer: +31 (0)20 573 72 74

E-mail: [Esther.vanherk@cna Hardy.com](mailto:Esther.vanherk@cna Hardy.com)

(Polisnummer: CT CNA-2015 HCCD0416C)

(Contactpersoon: Esther van Herk)

De verzekering biedt een dekking van € 650.000 per proefpersoon en € 5.000.000 voor het hele onderzoek (en € 7.500.000 per jaar voor alle onderzoeken van dezelfde opdrachtgever).

De verzekering dekt de volgende schade **niet**:

- schade door een risico waarover u in de schriftelijke informatie bent ingelicht. Dit geldt niet als het risico zich ernstiger voordoet dan was voorzien of als het risico heel onwaarschijnlijk was;
- schade aan uw gezondheid die ook zou zijn ontstaan als u niet aan het onderzoek had meegedaan;
- schade door het niet (volledig) opvolgen van aanwijzingen of instructies;
- schade aan uw nakomelingen, als gevolg van een negatief effect van het onderzoek op u of uw nakomelingen;
- schade door een bestaande behandelmethode bij onderzoek naar bestaande behandelmethoden.

## Bijlage C: overzicht onderzoekshandelingen

### 1. Indien u rondom de ingreep behandeld wordt met DDAVP

Dan dient u een relatief recente DDAVP-test te hebben of ondergaat u een DDAVP-test (indien uw behandeld arts het noodzakelijk vindt om een nieuwe DDAVP-test te doen, of als u nog nooit een DDAVP-test hebt gehad).

Als u eerst een DDAVP-test krijgt, zullen bij de start van de DDAVP-test 3-4 extra buisjes bloed worden afgenomen voor onderzoeksdoeleinden. Als u geen DDAVP-test meer hoeft te ondergaan voor de start van de ingreep, dan zullen 7 tot 9 extra buisjes bloed worden afgenomen vlak voor de ingreep. Bij de start van de DDAVP-test, of in de periode voor de ingreep zult u gewogen worden en een “lean body mass” meting krijgen.

### 2. Indien u rondom de ingreep behandeld wordt met stollingsfactorconcentraat

Voor het onderzoek is het nodig dat u in de periode voor de ingreep eenmalig op 3 achtereenvolgende dagen naar het ziekenhuis komt.

Tijdens deze bezoeken gebeurt het volgende:

- Dag 1: u wordt gewogen en er wordt een “lean body mass” meting gedaan. Er wordt bloed afgenomen (6 buisjes). Meteen hierna krijgt u eenmalig een dosering stollingsfactorconcentraat toegediend. Vervolgens wordt 10 minuten na de testdosis weer bloed afgenomen (4 buisjes). Twee tot zes uur na de toediening van de testdosis wordt nogmaals bloed afgenomen (4 buisjes). Het precieze tijdstip van deze bloedafname spreekt u af met de onderzoeker. Tussen de 2<sup>e</sup> en 3<sup>e</sup> bloedafname hoeft u niet in het ziekenhuis te blijven.
- Dag 2: ongeveer 24 uur na het toedienen van het stollingsfactorconcentraat wordt bloed afgenomen (4 buisjes), dit duurt ongeveer 15 minuten.
- Dag 3: ongeveer 48 uur na het toedienen van het stollingsfactorconcentraat wordt bloed afgenomen (4 buisjes), dit duurt ongeveer 15 minuten.



| In de periode voor de ingreep: eenmalig opstellen van een PK-profiel:                                                                                                                                                                                                                                                           |                                                                                   |                                                                                     |
|---------------------------------------------------------------------------------------------------------------------------------------------------------------------------------------------------------------------------------------------------------------------------------------------------------------------------------|-----------------------------------------------------------------------------------|-------------------------------------------------------------------------------------|
| <b>Dag 1:</b>                                                                                                                                                                                                                                                                                                                   | <b>Dag 2:</b>                                                                     | <b>Dag 3:</b>                                                                       |
| <ul style="list-style-type: none"> <li>- Weegen en "lean body mass" meting</li> <li>- Bloedafname (direct voor toediening testdosis)</li> <li>- Toediening testdosis stollingsfactorconcentraat</li> <li>- Bloedafname (10 minuten na toediening testdosis)</li> <li>- Bloedafname (2-6 uur na toediening testdosis)</li> </ul> | Bloedafname (+/-24 uur na testdosis)                                              | Bloedafname (+/-48 uur na toediening testdosis)                                     |
|                                                                                                                                                                                                                                                |  |  |

Aan de hand van de uitslagen van deze bloedafnames wordt voor u een persoonlijk farmacokinetisch model gemaakt. Rondom de ingreep wordt de dosering van het stollingsfactorconcentraat bepaald aan de hand van het farmacokinetisch model gebaseerd op gegevens van eerdere geopereerde patiënten, gecombineerd met uw persoonlijke model en de uitslagen van de dagelijkse bloedafnames na de ingreep.

### 3. Indien u behandeld wordt met DDAVP én stollingsfactorconcentraat

Dan dien je een relatief recente DDAVP-test te hebben of ondergaat u een DDAVP-test (indien uw behandelend arts het noodzakelijk vindt om een nieuwe DDAVP-test te doen, of als u nog nooit een DDAVP-test hebt gehad) (zie kopje 1).

Daarnaast zal een persoonlijk farmacokinetisch profiel gemaakt worden na toediening van stollingsfactorconcentraat (zie kopje 2). Tussen de eventuele DDAVP-test en het toedienen van stollingsfactorconcentraat voor het farmacokinetisch profiel moeten minstens 3 dagen zitten.

## Bijlage D: toestemmingsformulier volwassenen – medische interventies

### Onderzoek naar de effecten van farmacokinetische modellen bij het doseren DDAVP en/of stollingsfactorconcentraten bij patiënten met de ziekte van von Willebrand bij medische interventies

- Ik heb de informatiebrief gelezen. Ook kon ik vragen stellen. Mijn vragen zijn voldoende beantwoord. Ik had genoeg tijd om te beslissen of ik meedoe.
- Ik weet dat meedoen vrijwillig is. Ook weet ik dat ik op ieder moment kan beslissen om toch niet mee te doen of te stoppen met het onderzoek. Daarvoor hoef ik geen reden te geven.
- Ik weet dat voor de controle van het onderzoek sommige mensen mijn gegevens kunnen inzien. Die mensen staan vermeld in deze informatiebrief. Ik geef toestemming voor die inzage.
- Ik geef toestemming voor het verzamelen en gebruiken van mijn gegevens en bloedmonsters op de manier en voor de doelen die in de informatiebrief staan.
- Ik geef  **wel**
  - geen** toestemming om mijn lichaamsmateriaal nog 15 jaar na dit onderzoek te bewaren. Mogelijk kan dit later nog voor ander/meer onderzoek worden gebruikt, zoals in de informatiebrief staat.
- Ik geef  **wel**
  - geen** toestemming om mij na dit onderzoek opnieuw te benaderen voor een vervolgonderzoek.

1  
2  
3 Ik wil meedoen aan dit onderzoek.  
4  
5

6  
7 Naam proefpersoon:  
8  
9

10  
11 Handtekening:

Datum: \_\_/\_\_/\_\_

12  
13  
14  
15  
16  
17  
18 Ik verklaar dat ik deze proefpersoon volledig heb geïnformeerd over het genoemde onderzoek.  
19

20 Als er tijdens het onderzoek informatie bekend wordt die de toestemming van de proefpersoon zou  
21 kunnen beïnvloeden, dan breng ik hem/haar daarvan tijdig op de hoogte.  
22

23 Naam onderzoeker (of diens vertegenwoordiger):  
24  
25

26  
27  
28 Handtekening:

Datum: \_\_/\_\_/\_\_

29  
30  
31  
32 *De proefpersoon krijgt een volledige informatiebrief mee, samen met een kopie van het getekende*  
33 *toestemmingsformulier.*  
34  
35  
36  
37  
38  
39  
40  
41  
42  
43  
44  
45  
46  
47  
48  
49  
50  
51  
52  
53  
54  
55  
56  
57  
58  
59  
60

# Reporting checklist for protocol of a clinical trial.

Based on the SPIRIT guidelines.

## Instructions to authors

Complete this checklist by entering the page numbers from your manuscript where readers will find each of the items listed below.

Your article may not currently address all the items on the checklist. Please modify your text to include the missing information. If you are certain that an item does not apply, please write "n/a" and provide a short explanation.

Upload your completed checklist as an extra file when you submit to a journal.

In your methods section, say that you used the SPIRIT reporting guidelines, and cite them as:

Chan A-W, Tetzlaff JM, Gøtzsche PC, Altman DG, Mann H, Berlin J, Dickersin K, Hróbjartsson A, Schulz KF, Parulekar WR, Krleža-Jerić K, Laupacis A, Moher D. SPIRIT 2013 Explanation and Elaboration: Guidance for protocols of clinical trials. *BMJ*. 2013;346:e7586

|                                             |                     | Reporting Item                                                                                               | Page Number                     |
|---------------------------------------------|---------------------|--------------------------------------------------------------------------------------------------------------|---------------------------------|
| <b>Administrative information</b>           |                     |                                                                                                              |                                 |
| Title                                       | <a href="#">#1</a>  | Descriptive title identifying the study design, population, interventions, and, if applicable, trial acronym | 1                               |
| Trial registration                          | <a href="#">#2a</a> | Trial identifier and registry name. If not yet registered, name of intended registry                         | 3,6,15                          |
| Trial registration: data set                | <a href="#">#2b</a> | All items from the World Health Organization Trial Registration Data Set                                     | www.trialregister.nl:<br>NL7212 |
| Protocol version                            | <a href="#">#3</a>  | Date and version identifier                                                                                  | n/a                             |
| Funding                                     | <a href="#">#4</a>  | Sources and types of financial, material, and other support                                                  | 15                              |
| Roles and responsibilities: contributorship | <a href="#">#5a</a> | Names, affiliations, and roles of protocol contributors                                                      | 1                               |

|    |                      |                     |                                                     |        |
|----|----------------------|---------------------|-----------------------------------------------------|--------|
| 1  | Roles and            | <a href="#">#5b</a> | Name and contact information for the trial          | Supp 2 |
| 2  | responsibilities:    |                     | sponsor                                             |        |
| 3  | sponsor contact      |                     |                                                     |        |
| 4  | information          |                     |                                                     |        |
| 5  |                      |                     |                                                     |        |
| 6  |                      |                     |                                                     |        |
| 7  |                      |                     |                                                     |        |
| 8  | Roles and            | <a href="#">#5c</a> | Role of study sponsor and funders, if any, in       | Supp 7 |
| 9  | responsibilities:    |                     | study design; collection, management,               |        |
| 10 | sponsor and funder   |                     | analysis, and interpretation of data; writing of    |        |
| 11 |                      |                     | the report; and the decision to submit the          |        |
| 12 |                      |                     | report for publication, including whether they      |        |
| 13 |                      |                     | will have ultimate authority over any of these      |        |
| 14 |                      |                     | activities                                          |        |
| 15 |                      |                     |                                                     |        |
| 16 |                      |                     |                                                     |        |
| 17 |                      |                     |                                                     |        |
| 18 |                      |                     |                                                     |        |
| 19 | Roles and            | <a href="#">#5d</a> | Composition, roles, and responsibilities of the     | Supp 1 |
| 20 | responsibilities:    |                     | coordinating centre, steering committee,            |        |
| 21 | committees           |                     | endpoint adjudication committee, data               |        |
| 22 |                      |                     | management team, and other individuals or           |        |
| 23 |                      |                     | groups overseeing the trial, if applicable (see     |        |
| 24 |                      |                     | Item 21a for data monitoring committee)             |        |
| 25 |                      |                     |                                                     |        |
| 26 |                      |                     |                                                     |        |
| 27 |                      |                     |                                                     |        |
| 28 |                      |                     |                                                     |        |
| 29 | <b>Introduction</b>  |                     |                                                     |        |
| 30 |                      |                     |                                                     |        |
| 31 | Background and       | <a href="#">#6a</a> | Description of research question and                | 5,6    |
| 32 | rationale            |                     | justification for undertaking the trial, including  |        |
| 33 |                      |                     | summary of relevant studies (published and          |        |
| 34 |                      |                     | unpublished) examining benefits and harms for       |        |
| 35 |                      |                     | each intervention                                   |        |
| 36 |                      |                     |                                                     |        |
| 37 |                      |                     |                                                     |        |
| 38 |                      |                     |                                                     |        |
| 39 | Background and       | <a href="#">#6b</a> | Explanation for choice of comparators               | 5      |
| 40 | rationale: choice of |                     |                                                     |        |
| 41 | comparators          |                     |                                                     |        |
| 42 |                      |                     |                                                     |        |
| 43 |                      |                     |                                                     |        |
| 44 |                      |                     |                                                     |        |
| 45 | Objectives           | <a href="#">#7</a>  | Specific objectives or hypotheses                   | 6      |
| 46 |                      |                     |                                                     |        |
| 47 | Trial design         | <a href="#">#8</a>  | Description of trial design including type of trial | 6      |
| 48 |                      |                     | (eg, parallel group, crossover, factorial, single   |        |
| 49 |                      |                     | group), allocation ratio, and framework (eg,        |        |
| 50 |                      |                     | superiority, equivalence, non-inferiority,          |        |
| 51 |                      |                     | exploratory)                                        |        |
| 52 |                      |                     |                                                     |        |
| 53 |                      |                     |                                                     |        |
| 54 |                      |                     |                                                     |        |
| 55 | <b>Methods:</b>      |                     |                                                     |        |
| 56 | <b>Participants,</b> |                     |                                                     |        |
| 57 |                      |                     |                                                     |        |
| 58 |                      |                     |                                                     |        |
| 59 |                      |                     |                                                     |        |
| 60 |                      |                     |                                                     |        |

## interventions, and outcomes

|                                 |                      |                                                                                                                                                                                                                                                                                                                                                                                |           |
|---------------------------------|----------------------|--------------------------------------------------------------------------------------------------------------------------------------------------------------------------------------------------------------------------------------------------------------------------------------------------------------------------------------------------------------------------------|-----------|
| Study setting                   | <a href="#">#9</a>   | Description of study settings (eg, community clinic, academic hospital) and list of countries where data will be collected. Reference to where list of study sites can be obtained                                                                                                                                                                                             | 7, supp 2 |
| Eligibility criteria            | <a href="#">#10</a>  | Inclusion and exclusion criteria for participants. If applicable, eligibility criteria for study centres and individuals who will perform the interventions (eg, surgeons, psychotherapists)                                                                                                                                                                                   | 7         |
| Interventions: description      | <a href="#">#11a</a> | Interventions for each group with sufficient detail to allow replication, including how and when they will be administered                                                                                                                                                                                                                                                     | 8,9,10    |
| Interventions: modifications    | <a href="#">#11b</a> | Criteria for discontinuing or modifying allocated interventions for a given trial participant (eg, drug dose change in response to harms, participant request, or improving / worsening disease)                                                                                                                                                                               | 8         |
| Interventions: adherence        | <a href="#">#11c</a> | Strategies to improve adherence to intervention protocols, and any procedures for monitoring adherence (eg, drug tablet return; laboratory tests)                                                                                                                                                                                                                              | n/a       |
| Interventions: concomitant care | <a href="#">#11d</a> | Relevant concomitant care and interventions that are permitted or prohibited during the trial                                                                                                                                                                                                                                                                                  | n/a       |
| Outcomes                        | <a href="#">#12</a>  | Primary, secondary, and other outcomes, including the specific measurement variable (eg, systolic blood pressure), analysis metric (eg, change from baseline, final value, time to event), method of aggregation (eg, median, proportion), and time point for each outcome. Explanation of the clinical relevance of chosen efficacy and harm outcomes is strongly recommended | 9,10      |
| Participant timeline            | <a href="#">#13</a>  | Time schedule of enrolment, interventions (including any run-ins and washouts),                                                                                                                                                                                                                                                                                                | 8,9,10    |

assessments, and visits for participants. A schematic diagram is highly recommended (see Figure)

1  
2  
3  
4  
5 Sample size [#14](#) Estimated number of participants needed to 12,13  
6 achieve study objectives and how it was  
7 determined, including clinical and statistical  
8 assumptions supporting any sample size  
9 calculations  
10  
11  
12

13  
14 Recruitment [#15](#) Strategies for achieving adequate participant n/a  
15 enrolment to reach target sample size  
16

17 **Methods:**  
18 **Assignment of**  
19 **interventions (for**  
20 **controlled trials)**  
21  
22  
23

24 Allocation: [#16a](#) Method of generating the allocation sequence n/a  
25 sequence (eg, computer-generated random numbers),  
26 generation and list of any factors for stratification. To  
27 reduce predictability of a random sequence,  
28 details of any planned restriction (eg, blocking)  
29 should be provided in a separate document  
30 that is unavailable to those who enrol  
31 participants or assign interventions  
32  
33  
34  
35  
36

37 Allocation [#16b](#) Mechanism of implementing the allocation n/a  
38 concealment sequence (eg, central telephone; sequentially  
39 mechanism numbered, opaque, sealed envelopes),  
40 describing any steps to conceal the sequence  
41 until interventions are assigned  
42  
43  
44

45 Allocation: [#16c](#) Who will generate the allocation sequence, n/a  
46 implementation who will enrol participants, and who will assign  
47 participants to interventions  
48  
49

50  
51 Blinding (masking) [#17a](#) Who will be blinded after assignment to n/a  
52 interventions (eg, trial participants, care  
53 providers, outcome assessors, data analysts),  
54 and how  
55  
56  
57  
58  
59  
60

|    |                        |                      |                                                    |        |
|----|------------------------|----------------------|----------------------------------------------------|--------|
| 1  | Blinding (masking):    | <a href="#">#17b</a> | If blinded, circumstances under which              | n/a    |
| 2  | emergency              |                      | unblinding is permissible, and procedure for       |        |
| 3  | unblinding             |                      | revealing a participant's allocated intervention   |        |
| 4  |                        |                      | during the trial                                   |        |
| 5  |                        |                      |                                                    |        |
| 6  |                        |                      |                                                    |        |
| 7  |                        |                      |                                                    |        |
| 8  | <b>Methods: Data</b>   |                      |                                                    |        |
| 9  | <b>collection,</b>     |                      |                                                    |        |
| 10 | <b>management, and</b> |                      |                                                    |        |
| 11 | <b>analysis</b>        |                      |                                                    |        |
| 12 |                        |                      |                                                    |        |
| 13 |                        |                      |                                                    |        |
| 14 | Data collection plan   | <a href="#">#18a</a> | Plans for assessment and collection of             | 12,13  |
| 15 |                        |                      | outcome, baseline, and other trial data,           |        |
| 16 |                        |                      | including any related processes to promote         |        |
| 17 |                        |                      | data quality (eg, duplicate measurements,          |        |
| 18 |                        |                      | training of assessors) and a description of        |        |
| 19 |                        |                      | study instruments (eg, questionnaires,             |        |
| 20 |                        |                      | laboratory tests) along with their reliability and |        |
| 21 |                        |                      | validity, if known. Reference to where data        |        |
| 22 |                        |                      | collection forms can be found, if not in the       |        |
| 23 |                        |                      | protocol                                           |        |
| 24 |                        |                      |                                                    |        |
| 25 |                        |                      |                                                    |        |
| 26 |                        |                      |                                                    |        |
| 27 |                        |                      |                                                    |        |
| 28 |                        |                      |                                                    |        |
| 29 |                        |                      |                                                    |        |
| 30 | Data collection plan:  | <a href="#">#18b</a> | Plans to promote participant retention and         | n/a    |
| 31 | retention              |                      | complete follow-up, including list of any          |        |
| 32 |                        |                      | outcome data to be collected for participants      |        |
| 33 |                        |                      | who discontinue or deviate from intervention       |        |
| 34 |                        |                      | protocols                                          |        |
| 35 |                        |                      |                                                    |        |
| 36 |                        |                      |                                                    |        |
| 37 |                        |                      |                                                    |        |
| 38 |                        |                      |                                                    |        |
| 39 | Data management        | <a href="#">#19</a>  | Plans for data entry, coding, security, and        | supp 3 |
| 40 |                        |                      | storage, including any related processes to        |        |
| 41 |                        |                      | promote data quality (eg, double data entry;       |        |
| 42 |                        |                      | range checks for data values). Reference to        |        |
| 43 |                        |                      | where details of data management procedures        |        |
| 44 |                        |                      | can be found, if not in the protocol               |        |
| 45 |                        |                      |                                                    |        |
| 46 |                        |                      |                                                    |        |
| 47 |                        |                      |                                                    |        |
| 48 | Statistics: outcomes   | <a href="#">#20a</a> | Statistical methods for analysing primary and      | 13,14  |
| 49 |                        |                      | secondary outcomes. Reference to where             |        |
| 50 |                        |                      | other details of the statistical analysis plan can |        |
| 51 |                        |                      | be found, if not in the protocol                   |        |
| 52 |                        |                      |                                                    |        |
| 53 |                        |                      |                                                    |        |
| 54 |                        |                      |                                                    |        |
| 55 | Statistics: additional | <a href="#">#20b</a> | Methods for any additional analyses (eg,           | 13,14  |
| 56 | analyses               |                      | subgroup and adjusted analyses)                    |        |
| 57 |                        |                      |                                                    |        |
| 58 |                        |                      |                                                    |        |
| 59 |                        |                      |                                                    |        |
| 60 |                        |                      |                                                    |        |



|    |                      |                      |                                                     |        |
|----|----------------------|----------------------|-----------------------------------------------------|--------|
| 1  | Statistics: analysis | <a href="#">#20c</a> | Definition of analysis population relating to       | n/a    |
| 2  | population and       |                      | protocol non-adherence (eg, as randomised           |        |
| 3  | missing data         |                      | analysis), and any statistical methods to           |        |
| 4  |                      |                      | handle missing data (eg, multiple imputation)       |        |
| 5  |                      |                      |                                                     |        |
| 6  |                      |                      |                                                     |        |
| 7  |                      |                      |                                                     |        |
| 8  | <b>Methods:</b>      |                      |                                                     |        |
| 9  | <b>Monitoring</b>    |                      |                                                     |        |
| 10 |                      |                      |                                                     |        |
| 11 | Data monitoring:     | <a href="#">#21a</a> | Composition of data monitoring committee            | 14     |
| 12 | formal committee     |                      | (DMC); summary of its role and reporting            |        |
| 13 |                      |                      | structure; statement of whether it is               |        |
| 14 |                      |                      | independent from the sponsor and competing          |        |
| 15 |                      |                      | interests; and reference to where further           |        |
| 16 |                      |                      | details about its charter can be found, if not in   |        |
| 17 |                      |                      | the protocol. Alternatively, an explanation of      |        |
| 18 |                      |                      | why a DMC is not needed                             |        |
| 19 |                      |                      |                                                     |        |
| 20 |                      |                      |                                                     |        |
| 21 |                      |                      |                                                     |        |
| 22 |                      |                      |                                                     |        |
| 23 |                      |                      |                                                     |        |
| 24 | Data monitoring:     | <a href="#">#21b</a> | Description of any interim analyses and             | supp 7 |
| 25 | interim analysis     |                      | stopping guidelines, including who will have        |        |
| 26 |                      |                      | access to these interim results and make the        |        |
| 27 |                      |                      | final decision to terminate the trial               |        |
| 28 |                      |                      |                                                     |        |
| 29 |                      |                      |                                                     |        |
| 30 |                      |                      |                                                     |        |
| 31 | Harms                | <a href="#">#22</a>  | Plans for collecting, assessing, reporting, and     | 14     |
| 32 |                      |                      | managing solicited and spontaneously                |        |
| 33 |                      |                      | reported adverse events and other unintended        |        |
| 34 |                      |                      | effects of trial interventions or trial conduct     |        |
| 35 |                      |                      |                                                     |        |
| 36 |                      |                      |                                                     |        |
| 37 |                      |                      |                                                     |        |
| 38 | Auditing             | <a href="#">#23</a>  | Frequency and procedures for auditing trial         | supp 4 |
| 39 |                      |                      | conduct, if any, and whether the process will       |        |
| 40 |                      |                      | be independent from investigators and the           |        |
| 41 |                      |                      | sponsor                                             |        |
| 42 |                      |                      |                                                     |        |
| 43 |                      |                      |                                                     |        |
| 44 |                      |                      |                                                     |        |
| 45 | <b>Ethics and</b>    |                      |                                                     |        |
| 46 | <b>dissemination</b> |                      |                                                     |        |
| 47 |                      |                      |                                                     |        |
| 48 |                      |                      |                                                     |        |
| 49 | Research ethics      | <a href="#">#24</a>  | Plans for seeking research ethics committee /       | 14     |
| 50 | approval             |                      | institutional review board (REC / IRB) approval     |        |
| 51 |                      |                      |                                                     |        |
| 52 |                      |                      |                                                     |        |
| 53 | Protocol             | <a href="#">#25</a>  | Plans for communicating important protocol          | supp 5 |
| 54 | amendments           |                      | modifications (eg, changes to eligibility criteria, |        |
| 55 |                      |                      | outcomes, analyses) to relevant parties (eg,        |        |
| 56 |                      |                      | investigators, REC / IRBs, trial participants,      |        |
| 57 |                      |                      | trial registries, journals, regulators)             |        |
| 58 |                      |                      |                                                     |        |
| 59 |                      |                      |                                                     |        |
| 60 |                      |                      |                                                     |        |

|    |                       |                      |                                                                                                                                                                                                                                                                                     |        |
|----|-----------------------|----------------------|-------------------------------------------------------------------------------------------------------------------------------------------------------------------------------------------------------------------------------------------------------------------------------------|--------|
| 1  | Consent or assent     | <a href="#">#26a</a> | Who will obtain informed consent or assent from potential trial participants or authorised surrogates, and how (see Item 32)                                                                                                                                                        | 14     |
| 2  |                       |                      |                                                                                                                                                                                                                                                                                     |        |
| 3  |                       |                      |                                                                                                                                                                                                                                                                                     |        |
| 4  |                       |                      |                                                                                                                                                                                                                                                                                     |        |
| 5  |                       |                      |                                                                                                                                                                                                                                                                                     |        |
| 6  | Consent or assent:    | <a href="#">#26b</a> | Additional consent provisions for collection and use of participant data and biological specimens in ancillary studies, if applicable                                                                                                                                               | n/a    |
| 7  | ancillary studies     |                      |                                                                                                                                                                                                                                                                                     |        |
| 8  |                       |                      |                                                                                                                                                                                                                                                                                     |        |
| 9  |                       |                      |                                                                                                                                                                                                                                                                                     |        |
| 10 |                       |                      |                                                                                                                                                                                                                                                                                     |        |
| 11 | Confidentiality       | <a href="#">#27</a>  | How personal information about potential and enrolled participants will be collected, shared, and maintained in order to protect confidentiality before, during, and after the trial                                                                                                | supp 3 |
| 12 |                       |                      |                                                                                                                                                                                                                                                                                     |        |
| 13 |                       |                      |                                                                                                                                                                                                                                                                                     |        |
| 14 |                       |                      |                                                                                                                                                                                                                                                                                     |        |
| 15 |                       |                      |                                                                                                                                                                                                                                                                                     |        |
| 16 |                       |                      |                                                                                                                                                                                                                                                                                     |        |
| 17 |                       |                      |                                                                                                                                                                                                                                                                                     |        |
| 18 | Declaration of        | <a href="#">#28</a>  | Financial and other competing interests for principal investigators for the overall trial and each study site                                                                                                                                                                       | 16     |
| 19 | interests             |                      |                                                                                                                                                                                                                                                                                     |        |
| 20 |                       |                      |                                                                                                                                                                                                                                                                                     |        |
| 21 |                       |                      |                                                                                                                                                                                                                                                                                     |        |
| 22 |                       |                      |                                                                                                                                                                                                                                                                                     |        |
| 23 | Data access           | <a href="#">#29</a>  | Statement of who will have access to the final trial dataset, and disclosure of contractual agreements that limit such access for investigators                                                                                                                                     | supp 7 |
| 24 |                       |                      |                                                                                                                                                                                                                                                                                     |        |
| 25 |                       |                      |                                                                                                                                                                                                                                                                                     |        |
| 26 |                       |                      |                                                                                                                                                                                                                                                                                     |        |
| 27 |                       |                      |                                                                                                                                                                                                                                                                                     |        |
| 28 |                       |                      |                                                                                                                                                                                                                                                                                     |        |
| 29 |                       |                      |                                                                                                                                                                                                                                                                                     |        |
| 30 | Ancillary and post    | <a href="#">#30</a>  | Provisions, if any, for ancillary and post-trial care, and for compensation to those who suffer harm from trial participation                                                                                                                                                       | supp 6 |
| 31 | trial care            |                      |                                                                                                                                                                                                                                                                                     |        |
| 32 |                       |                      |                                                                                                                                                                                                                                                                                     |        |
| 33 |                       |                      |                                                                                                                                                                                                                                                                                     |        |
| 34 |                       |                      |                                                                                                                                                                                                                                                                                     |        |
| 35 |                       |                      |                                                                                                                                                                                                                                                                                     |        |
| 36 | Dissemination         | <a href="#">#31a</a> | Plans for investigators and sponsor to communicate trial results to participants, healthcare professionals, the public, and other relevant groups (eg, via publication, reporting in results databases, or other data sharing arrangements), including any publication restrictions | 14,15  |
| 37 | policy: trial results |                      |                                                                                                                                                                                                                                                                                     |        |
| 38 |                       |                      |                                                                                                                                                                                                                                                                                     |        |
| 39 |                       |                      |                                                                                                                                                                                                                                                                                     |        |
| 40 |                       |                      |                                                                                                                                                                                                                                                                                     |        |
| 41 |                       |                      |                                                                                                                                                                                                                                                                                     |        |
| 42 |                       |                      |                                                                                                                                                                                                                                                                                     |        |
| 43 |                       |                      |                                                                                                                                                                                                                                                                                     |        |
| 44 |                       |                      |                                                                                                                                                                                                                                                                                     |        |
| 45 |                       |                      |                                                                                                                                                                                                                                                                                     |        |
| 46 |                       |                      |                                                                                                                                                                                                                                                                                     |        |
| 47 | Dissemination         | <a href="#">#31b</a> | Authorship eligibility guidelines and any intended use of professional writers                                                                                                                                                                                                      | n/a    |
| 48 | policy: authorship    |                      |                                                                                                                                                                                                                                                                                     |        |
| 49 |                       |                      |                                                                                                                                                                                                                                                                                     |        |
| 50 |                       |                      |                                                                                                                                                                                                                                                                                     |        |
| 51 | Dissemination         | <a href="#">#31c</a> | Plans, if any, for granting public access to the full protocol, participant-level dataset, and statistical code                                                                                                                                                                     | n/a    |
| 52 | policy: reproducible  |                      |                                                                                                                                                                                                                                                                                     |        |
| 53 | research              |                      |                                                                                                                                                                                                                                                                                     |        |
| 54 |                       |                      |                                                                                                                                                                                                                                                                                     |        |
| 55 |                       |                      |                                                                                                                                                                                                                                                                                     |        |

## Appendices

|    |                  |                     |                                                  |        |
|----|------------------|---------------------|--------------------------------------------------|--------|
| 1  | Informed consent | <a href="#">#32</a> | Model consent form and other related             | supp 8 |
| 2  | materials        |                     | documentation given to participants and          |        |
| 3  |                  |                     | authorised surrogates                            |        |
| 4  |                  |                     |                                                  |        |
| 5  |                  |                     |                                                  |        |
| 6  | Biological       | <a href="#">#33</a> | Plans for collection, laboratory evaluation, and | n/a    |
| 7  | specimens        |                     | storage of biological specimens for genetic or   |        |
| 8  |                  |                     | molecular analysis in the current trial and for  |        |
| 9  |                  |                     | future use in ancillary studies, if applicable   |        |
| 10 |                  |                     |                                                  |        |
| 11 |                  |                     |                                                  |        |
| 12 |                  |                     |                                                  |        |

13 Notes:

- 14
- 15 • 2b: [www.trialregister.nl](http://www.trialregister.nl): NL7212 The SPIRIT checklist is distributed under the terms of the
  - 16 Creative Commons Attribution License CC-BY-ND 3.0. This checklist was completed on 25.
  - 17 January 2021 using <https://www.goodreports.org/>, a tool made by the [EQUATOR Network](#) in
  - 18 collaboration with [Penelope.ai](#)
  - 19
  - 20
  - 21
  - 22
  - 23
  - 24
  - 25
  - 26
  - 27
  - 28
  - 29
  - 30
  - 31
  - 32
  - 33
  - 34
  - 35
  - 36
  - 37
  - 38
  - 39
  - 40
  - 41
  - 42
  - 43
  - 44
  - 45
  - 46
  - 47
  - 48
  - 49
  - 50
  - 51
  - 52
  - 53
  - 54
  - 55
  - 56
  - 57
  - 58
  - 59
  - 60

# BMJ Open

**Is pharmacokinetic-guided dosing of desmopressin and von Willebrand factor-containing concentrates in individuals with von Willebrand disease or low von Willebrand factor reliable and feasible? A protocol for a multicenter, non-randomized, open label cohort trial, the OPTI-CLOT: To Win study**

|                                 |                                                                                                                                                                                                                                                                                                                                                                                                                                                                                                                                                                                                                                                               |
|---------------------------------|---------------------------------------------------------------------------------------------------------------------------------------------------------------------------------------------------------------------------------------------------------------------------------------------------------------------------------------------------------------------------------------------------------------------------------------------------------------------------------------------------------------------------------------------------------------------------------------------------------------------------------------------------------------|
| Journal:                        | <i>BMJ Open</i>                                                                                                                                                                                                                                                                                                                                                                                                                                                                                                                                                                                                                                               |
| Manuscript ID                   | bmjopen-2021-049493.R2                                                                                                                                                                                                                                                                                                                                                                                                                                                                                                                                                                                                                                        |
| Article Type:                   | Protocol                                                                                                                                                                                                                                                                                                                                                                                                                                                                                                                                                                                                                                                      |
| Date Submitted by the Author:   | 08-Oct-2021                                                                                                                                                                                                                                                                                                                                                                                                                                                                                                                                                                                                                                                   |
| Complete List of Authors:       | Heijdra, Jessica; Erasmus MC Sophia, Pediatric Hematology<br>Al Arashi, Wala; Erasmus MC Sophia, Pediatric Hematology<br>de Jager, Nico; Amsterdam UMC Location AMC, Hospital Pharmacy - Clinical Pharmacology<br>Cloesmeijer, Michael; Amsterdam UMC Location AMC, Hospital Pharmacy - Clinical Pharmacology<br>Bukkems, Laura; Amsterdam UMC Location AMC, Hospital Pharmacy - Clinical Pharmacology<br>Zwaan, Christian; Erasmus MC Sophia, Pediatric Oncology<br>Leebeek, Frank; Erasmus MC, Hematology<br>Mathôt, Ron; Amsterdam UMC Location AMC, Hospital Pharmacy - Clinical Pharmacology<br>Cnossen, Marjon; Erasmus MC Sophia, Pediatric Hematology |
| <b>Primary Subject Heading</b>: | Haematology (incl blood transfusion)                                                                                                                                                                                                                                                                                                                                                                                                                                                                                                                                                                                                                          |
| Secondary Subject Heading:      | Surgery                                                                                                                                                                                                                                                                                                                                                                                                                                                                                                                                                                                                                                                       |
| Keywords:                       | Bleeding disorders & coagulopathies < HAEMATOLOGY, Protocols & guidelines < HEALTH SERVICES ADMINISTRATION & MANAGEMENT, Clinical trials < THERAPEUTICS                                                                                                                                                                                                                                                                                                                                                                                                                                                                                                       |
|                                 |                                                                                                                                                                                                                                                                                                                                                                                                                                                                                                                                                                                                                                                               |

SCHOLARONE™  
Manuscripts

1  
2  
3 1 **Is pharmacokinetic-guided dosing of desmopressin and von Willebrand factor-containing**  
4 **concentrates in individuals with von Willebrand disease or low von Willebrand factor reliable**  
5 **and feasible? A protocol for a multicenter, non-randomized, open label cohort trial, the OPTI-**  
6 **CLOT: To WiN study**  
7  
8  
9

10  
11 5 Jessica M. Heijdra<sup>1</sup>, Wala Al Arashi<sup>1</sup>, Nico C.B. de Jager<sup>2</sup>, Michael E. Cloesmeijer<sup>2</sup>, Laura H.  
12 Bukkems<sup>2</sup>, Christian M. Zwaan<sup>3</sup>, Frank W.G. Leebeek<sup>4</sup>, Ron A.A. Mathôt<sup>2</sup>, & Marjon H. Cnossen<sup>1</sup>  
13  
14 7

15  
16 8 *<sup>1</sup>Department of Pediatric Hematology, Erasmus MC – Sophia Children’s Hospital, University*  
17 *Medical Center Rotterdam, Rotterdam, the Netherlands*

18  
19  
20 10 *<sup>2</sup>Hospital Pharmacy – Clinical Pharmacology, Amsterdam UMC, University of Amsterdam,*  
21 *Amsterdam, the Netherlands*

22  
23 12 *<sup>3</sup>Department of Pediatric Oncology, Erasmus MC – Sophia Children’s Hospital, University*  
24 *Medical Center Rotterdam, Rotterdam, the Netherlands*

25  
26  
27 14 *<sup>4</sup>Department of Hematology, Erasmus MC, University Medical Center Rotterdam, Rotterdam,*  
28 *the Netherlands*

29  
30  
31  
32 17 This study is part of the OPTI-CLOT research programme (Patient tailOred PharmacokineTic-  
33 18 guided dosing of CLOTting factor concentrates and desmopressin in bleeding disorders), an  
34 19 (inter)national multicenter study. Its aim is to construct and enrich population PK-models for  
35 20 factor replacement therapy, desmopressin and alternative treatments, and to implement PK-  
36 21 guided dosing by demonstrating its implications and feasibility, thereby increasing knowledge  
37 22 of patient-tailored PK-guided dosing in bleeding disorders.  
38  
39  
40  
41  
42  
43  
44

45 24 Corresponding author:

46  
47  
48 25 Dr. Marjon H. Cnossen, MD PhD

49 26 Department of Pediatric Hematology

50 27 Erasmus University Medical Center – Sophia Children’s Hospital

51 28 Room SP-2435

52 29 P.O. Box 2040

1  
2  
3 1 3000 CA Rotterdam

4  
5 2 The Netherlands

6  
7 3 E-mail: [m.cnossen@erasmusmc.nl](mailto:m.cnossen@erasmusmc.nl)

8  
9 4

10 5 Keywords: von Willebrand disease, precision medicine, pharmacokinetics, desmopressin, factor  
11 concentrates  
12  
13 6

14 7

15  
16 8

For peer review only

**1 ABSTRACT**

2 **Introduction** Von Willebrand disease (VWD) is a bleeding disorder, caused by a deficiency or  
3 defect of von Willebrand factor (VWF). In case of medical procedures or bleeding, patients are  
4 treated with desmopressin and/or VWF-containing concentrates to increase plasma VWF and  
5 factor VIII (FVIII). However, in many cases these factor levels are outside the targeted range.  
6 Therefore, population pharmacokinetic (PK) models have been developed, which aim to  
7 quantify and explain intra-individual and inter-individual differences in treatment response.  
8 These models enable calculation of individual PK parameters by Bayesian analysis, based on an  
9 individual desmopressin test or PK profile with a VWF-containing concentrate. Subsequently,  
10 the dose necessary for an individual to achieve coagulation factor target levels can be  
11 calculated.

12 **Methods and analysis** Primary aim of this study is to assess the predictive performance (the  
13 difference between predicted and measured von VWF activity and FVIII levels) of Bayesian  
14 forecasting using the developed population PK models in four different situations: A)  
15 desmopressin testing (n ≥30); B) medical procedures (n = 70; 30 receiving desmopressin, 30  
16 receiving VWF-containing concentrate and 10 receiving a combination of both); C) bleeding  
17 episodes (n = 20; 10 receiving desmopressin and 10 receiving VWF-containing concentrate); and  
18 D) prophylaxis with a VWF-containing concentrate (n = 3 to 5). Individuals with all types of VWD  
19 and individuals with low VWF (VWF 0.30-0.60 IU/mL) will be included. Reliability and feasibility  
20 of PK-guided dosing will be tested by assessing predictive performance, treatment duration,  
21 hemostasis, patient satisfaction and physician satisfaction.

22 **Ethics and dissemination** The OPTI-CLOT:To WiN study was approved by the medical ethics  
23 committee of the Erasmus MC, University Medical Center Rotterdam, the Netherlands. Results  
24 of the study will be communicated through publication in international scientific journals and  
25 presentation at (inter)national conferences.

26 **Trial registration number:** NL7212 (NTR7411); Pre-results.

## 1 STRENGTHS AND LIMITATIONS OF THIS STUDY

- 2 - We will include individuals with VWD and low VWF from different hemophilia  
3 treatment centers in the Netherlands.
- 4 - This is the first study to assess reliability and predictive performance of population  
5 pharmacokinetic models for desmopressin and VWF-containing concentrates in clinical  
6 practice.
- 7 - This study will not intervene in treatment choice (desmopressin and/or VWF-containing  
8 concentrate) or brand of medication, to approach the real-life situation as much as  
9 possible.
- 10 - The developed population pharmacokinetic models will be tested in different situations:  
11 during desmopressin testing, during treatment for medical procedures or bleeding, and  
12 during prophylactic treatment.
- 13 - Due to the relatively small patient numbers in each of the different situations,  
14 randomization of treatment is not possible.



## 1 INTRODUCTION

2 Von Willebrand disease (VWD) is the most common inherited bleeding disorder.<sup>1</sup> It is caused by  
3 low or absent von Willebrand factor (VWF), or by a functional defect of VWF. VWF is essential  
4 for primary hemostasis as it facilitates platelet plug formation at sites of vascular injury. It also  
5 plays a role in secondary hemostasis, as it protects factor VIII (FVIII) from being cleared from  
6 the circulation. Symptoms of VWD include bleeding after trauma or surgery and (spontaneous)  
7 mucocutaneous bleeding. VWD is classified into three main types: type 1 and type 3 are  
8 respectively; a partial (VWF <0.30 IU/mL) and a complete (VWF <0.05 IU/mL) absence of VWF,  
9 whereas type 2 comprises several functional defects of VWF.<sup>2</sup> In type 2A, binding of VWF to  
10 platelets is decreased, while in type 2B, affinity of VWF for platelets is increased. In both type  
11 2A and 2B, there is an absence of high molecular weight VWF multimers (HMWM). In type 2M,  
12 platelet binding is decreased, but this is not caused by the absence of HMWM. In type 2N, often  
13 VWF levels are normal, however affinity of VWF for FVIII is decreased, leading to decreased  
14 FVIII levels. Individuals with low VWF have a bleeding tendency associated with VWF levels  
15 between 0.30-0.60 IU/mL.<sup>3</sup>

16 Individuals with VWD are treated with desmopressin or -in more severe cases or when  
17 prophylactic therapy is needed- VWF-containing concentrates. The main reasons for treatment  
18 are acute bleeding and prevention of bleeding during medical procedures, (e.g. dental  
19 procedures, surgery or in-hospital childbirth). Prophylactic treatment to prevent spontaneous  
20 bleeding is seldom necessary and mainly applied in type 3 and severely affected type 1 and 2  
21 patients. The aim of treatment is to accomplish sufficient hemostasis by achieving  
22 physiologically normal plasma coagulation factor levels. However, it has been previously  
23 reported in a study on perioperative treatment of VWD patients with Haemate P, that a  
24 majority of patients (65% in type 1, 53% in type 2 and 57% in type 3 VWD) achieve higher VWF  
25 activity (VWF:Act, or VWF function) levels than aimed for, and a minority (16% in type 1, 38% in  
26 type 2 and 29% in type 3 VWD respectively) does not reach sufficient levels for adequate  
27 hemostasis.<sup>4</sup> This may lead to an increased risk of either thrombosis or bleeding. Moreover,  
28 costs of treatment are high as VWF-containing factor concentrates are expensive and frequent  
29 laboratory monitoring of plasma VWF and FVIII is required. As rising health care costs are an

1  
2  
3 1 increasing concern, it is important to investigate alternative dosing strategies that facilitate  
4  
5 2 more precise dosing, to improve quality of care with potential reduction of costs.  
6

7 3 Currently, desmopressin dosage and dosing frequency are solely based on body weight  
8  
9 4 and estimated degree of tachyphylaxis. Dosing of VWF-containing concentrates is also based on  
10  
11 5 body weight, and dose calculations are made according to target VWF and FVIII values based on  
12  
13 6 the severity of the bleed or the type of medical procedure.<sup>5</sup> However, pharmacokinetics (PK) of  
14  
15 7 desmopressin and VWF-containing concentrates differ within and between patients (i.e. intra-  
16  
17 8 individual and inter-individual differences), and large inter-individual differences in response to  
18  
19 9 desmopressin are observed.<sup>6-8</sup> Population PK models that describe plasma VWF:Act and FVIII  
20  
21 10 after administration of desmopressin or VWF-containing concentrates have been constructed  
22  
23 11 by our group (however not all models have been published yet).<sup>9,10</sup> These models are based on  
24  
25 12 retrospective DDAVP-testing data and VWF-containing concentrate treatment data from  
26  
27 13 multiple hemophilia treatment centers in the Netherlands and in the United Kingdom. In a  
28  
29 14 population PK model, the typical PK parameters and their corresponding variability are  
30  
31 15 estimated. Subsequently, covariate relationships (e.g. patient characteristics and procedure  
32  
33 16 characteristics), can be used to (partially) explain the estimated variability.<sup>11</sup>

34  
35 17 With these population PK models, we are able to perform Bayesian forecasting: all  
36  
37 18 information and sources of uncertainty are combined into a predictive distribution for the  
38  
39 19 future values, after which point forecasts (the predicted future values) and interval forecasts  
40  
41 20 (the uncertainty level surrounding these predicted future values) can be obtained.<sup>12</sup> In our  
42  
43 21 models, individual VWF:Act and FVIII PK parameters are calculated. These PK-parameters are  
44  
45 22 based on patient characteristics, combined with VWF:Act and FVIII measurements obtained  
46  
47 23 after an individual test dose of desmopressin or VWF-containing concentrate, or measurements  
48  
49 24 obtained during a bleeding episode or medical procedure. Based on the estimated individual PK  
50  
51 25 parameters, we are able to design a personalized dosing strategy for each patient. We  
52  
53 26 hypothesize that PK-guided dosing of desmopressin and VWF-containing concentrates may  
54  
55 27 improve safety and efficacy of therapy, and lower treatment costs. It is essential to first  
56  
57 28 evaluate the predictive performance of PK-guided dosing and the feasibility of this approach  
58  
59 29 prospectively, in order to prove its effectiveness and safety.  
60

1  
2  
3 1  
4**OBJECTIVE**

To prospectively investigate the reliability and feasibility of PK-guided dosing of desmopressin and VWF-containing concentrates in individuals with VWD and low VWF.

5  
6  
7  
8  
9  
10  
11  
12 6**METHODS****Trial design**

The OPTI-CLOT: To WiN trial is a multicenter, non-randomized, open label cohort study. The study was approved by the Medical Ethics Committee of the Erasmus MC, University Medical Center Rotterdam, the Netherlands, and was registered in the Netherlands Trial Register with trial registration number NL7212 and to EudraCT with number 2018-001631-46. The first patient was included on April 8th, 2019. The planned end date of the study is October 1st, 2023.

13  
14  
15  
16  
17  
18  
19  
20  
21  
22  
23  
24  
25  
26  
27  
28  
29 15**Study population**

After obtaining informed consent, individuals with congenital VWD or low VWF will be enrolled if they will, for medical reasons, have to undergo a desmopressin test, require hemostatic treatment with monitoring of VWF:Act and FVIII during a medical procedure or during a bleeding episode, or receive prophylaxis with a VWF-containing concentrate. Patients will be recruited from Hemophilia Treatment Centers in the Netherlands.

30  
31  
32  
33  
34  
35  
36  
37  
38  
39  
40  
41  
42 22**Inclusion criteria**

- Individuals of all ages with any type of VWD or low VWF with historically lowest VWF antigen (VWF:Ag), VWF:Act and/or VWF collagen binding (VWF:CB) level <0.60 IU/mL, or historically lowest FVIII level <0.40 IU/mL (only in case of type 2N VWD), who;
- Provide informed patient consent (if patient is ≥12 years), or parental informed consent (if patient is <12 years), or both (if patient is between 12 and 16 years); who;
- Are scheduled to undergo a desmopressin test, or;

43  
44  
45  
46  
47  
48  
49  
50  
51  
52  
53  
54  
55  
56  
57  
58  
59  
60

- 1  
2  
3 1 - Are scheduled to undergo an elective medical procedure (e.g. dental procedure,  
4 surgery, diagnostic procedure or in-hospital child delivery), requiring treatment with  
5 2 desmopressin and/or a VWF-containing concentrate (Haemate P, Wilate, Wilfactin or  
6 3 Veyvondi) with monitoring of VWF and FVIII levels, or;  
7 4  
8  
9  
10 5 - Have a bleeding episode requiring treatment with desmopressin and/or a VWF-  
11 6 containing concentrate with monitoring of VWF and FVIII levels, or;  
12 7  
13 8  
14 9  
15 7 - Require prophylaxis with a VWF-containing concentrate due to frequent bleeding  
16 8 episodes;  
17 9  
18  
19

#### 20 10 **Exclusion criteria**

- 21 11 - Any other known hemostatic abnormalities;  
22 12 - Acquired VWD;  
23 13 - Presence of VWF antibodies (>0.2 BU);  
24 14  
25 13  
26  
27 14  
28

#### 29 15 **Intervention**

30 16 Predictive performance will be tested in all study arms, and feasibility of PK-guided dosing will  
31 17 be tested in arm B, C and D:

32 18 Arm A: patients who will undergo a desmopressin test.

33 19 Arm B: patients who will undergo an elective medical procedure.

34 20 Arm C: patients with a bleeding episode.

35 21 Arm D: patients receiving or requiring prophylaxis.  
36  
37  
38  
39  
40  
41  
42  
43  
44

#### 45 23 **Desmopressin testing (arm A)**

46 24 In standard VWD care, most patients (except most type 2B VWD patients and all type 3 VWD  
47 25 patients) undergo a desmopressin test to determine their individual response to desmopressin.

48 26 Desmopressin testing comprises measuring VWF:Act and FVIII before desmopressin  
49 27 administration and at 1 hour and 3-4 hours after desmopressin administration (0.3 µg/kg  
50 28 intravenously or subcutaneously or 300 µg (or 150 µg if body weight is <50 kg) intranasally), to  
51 29 assess the effect of desmopressin in the individual patient.  
52  
53  
54  
55  
56  
57  
58  
59  
60

1  
2  
3 1 In individuals who will undergo a desmopressin test, VWF:Act and FVIII response will be  
4 predicted a priori based on the constructed population PK-model and individual patient  
5  
6  
7 3 characteristics.

8  
9 4  
10  
11 5 **On demand treatment (arm B+C)**

12 6 During elective medical procedures and during bleeding episodes, we will aim for VWF:Act and  
13  
14 7 FVIII target plasma levels as defined in the national guidelines (table 1).<sup>13</sup> However, the treating  
15  
16 8 physician will be able to set specific VWF:Act and FVIII target levels if needed, as is standard  
17  
18 9 practice. These patient-specific target levels will be recorded prior to treatment and will be  
19  
20 10 communicated to the clinical pharmacologist performing PK modelling. The pharmacologist will  
21  
22 11 then provide a dosing strategy based on the patients' characteristics and individual  
23  
24 12 desmopressin test and/or VWF-containing concentrate PK profile (performed prior to the  
25  
26 13 procedure with the specific concentrate that will be used during the procedure), combined with  
27  
28 14 the specific population PK model. When, at any time during the treatment period, target  
29  
30 15 VWF:Act and FVIII plasma levels are not reached, additional desmopressin and/or VWF-  
31  
32 16 containing concentrate can be administered by the treating physician to secure hemostasis.  
33  
34 17 Therefore, bleeding risk for patients participating in the study will not be higher than in patients  
35  
36 18 treated according to standard protocol.

37  
38 20 **Table 1** Guidelines for substitution with VWF-containing concentrate in VWD according to  
39  
40 21 Dutch national guidelines.

| Indication        | Target levels                                                                 |
|-------------------|-------------------------------------------------------------------------------|
| Dental extraction | FVIII:C and VWF:Act >0.50 IU/mL                                               |
| Surgery           | Prior to surgery and 36 hours postoperatively FVIII:C and VWF:Act >0.80 IU/mL |
| Major surgery     | FVIII:C >0.50 IU/mL during 7-10 days                                          |
| Minor surgery     | FVIII:C >0.50 IU/mL during 3 days and >0.30 IU/mL during 4-7 days             |

53  
54 22 FVIII:C = Factor VIII activity; VWF:Act = von Willebrand factor activity  
55  
56 23

## 1 **Prophylaxis (D)**

2 In individuals receiving or requiring prophylaxis with a VWF-containing concentrate due to  
3 frequent bleeding episodes, patients will first undergo PK-profiling. This will be done in order to  
4 determine the optimal dosage of VWF-containing concentrate on basis of VWF:Act or FVIII  
5 target trough and peak values as set by the treating physician and patients' individual PK  
6 parameters (as derived by Bayesian analysis). Patients will initially receive PK-guided treatment  
7 for 12 weeks. During this period, plasma VWF:Act and FVIII will be measured and will be  
8 compared to predicted VWF:Act and FVIII to validate the advised dosing regimen. Information  
9 on bleeding episodes will be obtained from medical records. Participants will be followed up for  
10 a period of 24 weeks in which additional data will be collected in order to assess the association  
11 between plasma VWF:Act and FVIII concentrations and bleeding events.

## 13 **Individual pharmacokinetic profiling**

14 For every patient in arm B, C and D, an individualized dosing strategy will be provided based on  
15 actual body weight, type and severity of the procedure or bleeding, target VWF:Act and FVIII,  
16 baseline VWF:Act and FVIII and, if possible, an individual PK profile. Patients who will undergo a  
17 procedure requiring VWF-containing concentrate and patients who will receive prophylaxis, will  
18 undergo PK profiling with the VWF-containing concentrate of choice. Blood sampling for VWF  
19 and FVIII will be performed directly before bolus infusion and at approximately 10 minutes, 2 to  
20 6 hours, 24 hours and 48 hours after infusion. Measuring VWF and FVIII at these time points will  
21 enable the construction of a concentration-time curve.

## 23 **Population PK models**

24 Population PK models for desmopressin and different VWF-containing concentrates have been  
25 constructed using NONMEM<sup>®</sup> software (however not all our models have been published yet)<sup>9</sup>  
26 <sup>10</sup>. These models are able to predict average PK parameters for VWF:Act and FVIII (as well as the  
27 inter-individual variability of these PK parameters, and intra-individual variability of some of the  
28 PK parameters), in a population of individuals with VWD and low VWF. So, for every average PK  
29 parameter,

1  
2  
3 1 In these PK models, the relationship between different patient factors and treatment  
4 factors (e.g. age, sex, weight, baseline VWF and FVIII, blood group type and VWF levels and PK  
5 2 parameters) are described. This allows prediction of the PK of VWF:Act and/or FVIII after  
6 3 desmopressin and VWF-containing concentrate administration. Combining an individual PK  
7 4 profile with the population PK model will allow for better prediction of the required doses and  
8 5 dosing frequency, -as well as better prediction of plasma coagulation factor levels- than  
9 6 prediction based on the population PK model alone.  
10 7  
11 8  
12 9  
13 10  
14 11  
15 12  
16 13  
17 14  
18 15  
19 16  
20 17  
21 18  
22 19  
23 20  
24 21  
25 22  
26 23  
27 24  
28 25  
29 26  
30 27  
31 28  
32 29  
33 30  
34 31  
35 32  
36 33  
37 34  
38 35  
39 36  
40 37  
41 38  
42 39  
43 40  
44 41  
45 42  
46 43  
47 44  
48 45  
49 46  
50 47  
51 48  
52 49  
53 50  
54 51  
55 52  
56 53  
57 54  
58 55  
59 56  
60 57

### 9 **Primary endpoints**

10 Arm A (desmopressin testing): predictive performance of the desmopressin population PK  
11 model: reliability of predicted VWF:Act and FVIII levels, defined as the difference between  
12 predicted and actual VWF:Act and FVIII levels.  
13

14 Arm B (elective medical procedures requiring treatment with desmopressin and/or VWF-  
15 containing concentrate): predictive performance of the Bayesian adaptive approach using the  
16 population PK model for desmopressin and/or VWF-containing concentrate, (i.e. reliability of  
17 the predicted VWF:Act and FVIII levels, defined as the difference between predicted and actual  
18 VWF:Act and FVIII levels achieved after dosing).  
19

20 Arm C (bleeding episode requiring treatment with desmopressin or VWF-containing  
21 concentrate): predictive performance of the respective population PK models, (i.e. reliability of  
22 the predicted VWF:Act and FVIII levels, defined as the difference between predicted and actual  
23 VWF:Act and FVIII levels achieved after dosing).  
24

25 Arm D (prophylactic treatment with a VWF-containing concentrate): predictive performance of  
26 the VWF-containing concentrate population PK models, (i.e. reliability of the predicted VWF:Act  
27 and FVIII levels, defined as the difference between predicted and actual VWF:Act and FVIII  
28 levels achieved after dosing).  
29  
30  
31  
32  
33  
34  
35  
36  
37  
38  
39  
40  
41  
42  
43  
44  
45  
46  
47  
48  
49  
50  
51  
52  
53  
54  
55  
56  
57  
58  
59  
60

## 1 **Secondary endpoints**

2 (Only in arm B, C and D): number and timing of desmopressin administrations (desmopressin  
3 dose will be standardized at 0.3 µg/kg) and/or timing and dosing of VWF-containing  
4 concentrate infusions.

5 (Only in arm B, C and D): hemostasis quantified by: hemoglobin levels, blood loss (ml),  
6 incidence of bleeds, incidence of thrombosis, and need for blood transfusion and/or re-  
7 operation because of bleeding.

8 (Only in arm B and C): duration of hospitalization (days), number of clinical visits.

9 (Only in arm B, C and D): Feasibility of the procedure with regard to patient and physician  
10 satisfaction and economic impact.

11 (Only in case of desmopressin testing or desmopressin treatment (in arm A, B and C)):  
12 desmopressin plasma concentrations.

## 14 **Sample size**

15 In this prospective study, we will explore the predictive performance of the constructed  
16 population PK models for desmopressin and VWF-containing concentrates. In bleeding and  
17 surgery, we will aim for VWF:Act and FVIII target trough levels (defined as 100-125% of  
18 VWF:Act and FVIII target trough level as stated by the treating physician and according to the  
19 national guidelines).

20 It is not common practice to calculate a sample size for prognostic models, and to our  
21 knowledge it is not possible to calculate a sample size for the determination of predictive  
22 performance, our primary outcome. However, as characteristics such as age, sex and disease  
23 type are not part of the inclusion criteria or exclusion criteria, the study population will be a  
24 reflection of the heterogeneous 'real life' VWD and low VWF population. Consequently, this will  
25 increase the 'effective sample size' of our study population.

26 To be able to provide an estimation of the sample size needed, we have calculated  
27 sample sizes for outcomes that may be seen as surrogates for the primary outcome. Based on a  
28 random sample (n=100) of our retrospective cohort of patients whom underwent a  
29 desmopressin test, we have constructed an average VWF:Act-after-desmopressin curve with



1  
2  
3 1 25% percentiles. In 81% of individual desmopressin tests, one or more time points fall outside  
4  
5 2 of the 50% confidence interval of this average curve. Data from our retrospective cohort study  
6  
7 3 on perioperative treatment with a VWF-containing concentrate (Haemate P<sup>®</sup>) show that in the  
8  
9 4 total study population, 81% of FVIII trough levels in the first 36 hours was >0.20 IU/mL higher  
10  
11 5 than targeted<sup>4</sup>. Using adaptive Bayesian dosing, we estimate that we can decrease the  
12  
13 6 percentage in both groups from 81% to <50%. To determine this with an alpha of 0.02 and a  
14  
15 7 power of 90%, we will have to include at least 25 patients in the desmopressin test group and  
16  
17 8 at least 25 patients in the perioperative VWF-containing concentrate group. To allow for  
18  
19 9 dropouts, at least 30 patients will be included in the desmopressin test group, and 30 patients  
20  
21 10 will be included in the perioperative VWF-containing concentrate group. For desmopressin  
22  
23 11 treatment during medical procedures, scarce data is available on factor levels during the  
24  
25 12 periprocedural period. However, as we will also use the desmopressin test PK model in this  
26  
27 13 setting, we assume similarity to the desmopressin test group and will also include 30 patients.

27 14 To explore the applicability of the currently available population PK models in other  
28  
29 15 settings, predictive performance of the population PK models and PK-guided dose adjustments  
30  
31 16 in groups for which no retrospective data is available, will be tested. Only small numbers of  
32  
33 17 patients are currently treated with desmopressin in combination with VWF-containing  
34  
35 18 concentrate, and it is expected that inclusion of patients with acute bleeding will be logistically  
36  
37 19 challenging. Therefore, we aim to include 10 patients who will receive a combination of  
38  
39 20 desmopressin and VWF-containing concentrate during a medical procedure, 10 patients with a  
40  
41 21 bleeding episode receiving treatment with desmopressin and 10 patients with a bleeding  
42  
43 22 episode receiving treatment with VWF-containing concentrate. As very few patients in the  
44  
45 23 Netherlands receive prophylaxis, we aim to include 3-5 patients in arm D. In these settings, the  
46  
47 24 population PK models for treatment with desmopressin and VWF-containing concentrate will  
48  
49 25 be combined, and we will extrapolate the perioperative PK models to bleeding and prophylaxis.  
50  
51 26 Due to the low sample sizes in arm C and D, predictive performance of the models (the primary  
52  
53 27 endpoint) in these arms can only be assessed on an individual level, giving a rough idea of the  
54  
55 28 accuracy of the models in these settings.

56  
57  
58  
59  
60 29

## 1 **Data analysis plan**

### 2 ***Primary study parameters***

3 Predictive performance of the population PK models (defined as difference between predicted  
4 and actual FVIII and VWF:Act levels achieved after dosing) will be analyzed using Bland Altman  
5 analysis.<sup>14</sup> Mean relative error (MRE) will be calculated to determine accuracy, and root mean  
6 squared error (RMSE) will be calculated to determine precision.

### 8 ***Secondary study parameters***

- 9 1. In case of perioperative treatment with VWF-containing concentrate (n = 30): concentrate  
10 consumption (IU/kg) from 24 hours before surgery until stop of VWF-containing  
11 concentrate infusions will be compared to consumption in the retrospective treatment  
12 cohort, of which the data have already been published<sup>4</sup>. If patients underwent >1 surgical  
13 procedure, only the first one will be used for analysis. The distribution of outcomes for the  
14 prospectively studied group will be tested for normality using the Shapiro-Wilk test. In case  
15 of a non-significant ( $p > 0.05$ ) result of this test, the t-test will be used for the comparison of  
16 the primary endpoint. In case the resulting p-value for the Shapiro-Wilk test is equal or less  
17 than 0.05, the Wilcoxon-rank sum test will be used. The level for significance for this  
18 analysis will be set at two-sided  $p < 0.05$ . Number and timing of desmopressin infusions will  
19 be defined quantitatively.
- 20 2. In the perioperative group, hemostasis will be quantified by amount of blood loss (mL).  
21 Bleeding complications or thrombotic complications will be defined quantitatively.
- 22 3. In the perioperative group, duration of hospitalization (days) will be defined quantitatively.
- 23 4. Feasibility of the procedure: patient and physician satisfaction during PK-guided treatment  
24 during surgery and bleeding will be measured using a 10-point VAS (visual-analogue scale)  
25 questionnaire and will be defined quantitatively. Economic evaluation will be performed  
26 from a health care perspective taking all health care costs (i.a. costs of medication,  
27 hospitalization costs) into account.

- 1  
2  
3 1 5. To test the correlation between desmopressin concentrations and relative increase in FVIII  
4 and VWF levels during desmopressin tests, and during desmopressin treatment during  
5 surgery or bleeding, the Pearson correlation coefficient will be calculated.  
6  
7  
8  
9  
10 4

### 11 5 **Patient and public involvement**

12  
13 6 During development of all OPTI-CLOT studies, we work closely together with The Netherlands  
14 Hemophilia Patient Society (NVHP). A member of the NVHP is also a member of the OPTI-CLOT  
15 study group and plays an advisory role in developing the studies within the consortium. The  
16 final results of the study will be communicated through international scientific journals and at  
17 international conferences. In addition, a layman summary of the results of this study will be  
18 published in the NVHP magazine. Lastly, the results of the study will be implemented in  
19 treatment guidelines and patient information will be adjusted accordingly.  
20  
21  
22  
23  
24  
25  
26  
27

### 28 14 **Ethics and dissemination**

29  
30 15 The trial protocol was approved by the Medical Ethics Committee of the Erasmus MC,  
31 University Medical Center Rotterdam, the Netherlands. The study will be conducted according  
32 to good clinical practice (GCP) guidelines and the Declaration of Helsinki, and in accordance  
33 with the Dutch Medical Research Involving Humans Act (WMO). Written informed consent will  
34 be obtained from all participants by the investigator. Also, see online supplementary data for  
35 our regulations for data storage, amendments and compensation for injury. Results of the study  
36 will be communicated to the (inter)national medical and scientific community through  
37 publication in high-ranking peer-reviewed international journals and at (inter)national  
38 conferences. Results of the study will be implemented in the Dutch Haemophilia Treatment  
39 Guidelines and may also be adopted by international Haemophilia Treatment Societies.  
40  
41  
42  
43  
44  
45  
46  
47  
48  
49

### 50 26 **Data monitoring committee and serious adverse events**

51  
52 27 Safety risks for participants are minimal as the VWF-containing concentrates and desmopressin  
53 used in this study are registered therapeutics for treatment of von Willebrand disease. To  
54  
55  
56  
57  
58  
59  
60

1  
2  
3 1 guarantee safety for participants in this study, VWF and FVIII levels will be monitored closely to  
4 prevent any additional bleeding risk. Therefore, a data safety monitoring board is not needed.  
5  
6 2 Serious adverse events (SAE) will be communicated to the sponsor within 24 hours. The  
7  
8 3 sponsor will register the SAE within 15 days on ToetsingOnline, the Dutch registration system  
9  
10 4 for SAEs.  
11  
12 5  
13 6

## 7 **REGISTRATION**

14  
15  
16 8 The trial is registered at the Netherlands Trial Register, number NL7212  
17  
18 9 ([www.trialregister.nl/trial/7212](http://www.trialregister.nl/trial/7212)) and to EudraCT with number 2018-001631-46.  
19

## 20 21 **ACKNOWLEDGEMENTS**

22  
23 12 The authors would like to thank all patients, physicians and (research) nurses participating in  
24  
25 13 the study, and the OPTI-CLOT research group for their support.  
26  
27 14

## 28 29 **FUNDING STATEMENT**

30  
31 16 This investigator-initiated research project was supported by the Innovation Fund of Health  
32  
33 17 Care Insurance Companies (Innovatiefonds Zorgverzekeraars) in the Netherlands (project  
34  
35 18 number 3216). The funder is not involved in the design or performance of the study and does  
36  
37 19 not get any benefits from the study.  
38  
39 20

## 40 41 **AUTHOR STATEMENT**

42  
43 22 JH, RM and MHC designed the study. WAA, NdJ (deceased), LB, MEC, CZ and FL provided critical  
44  
45 23 guidance during the design of the study. JH wrote the manuscript. All authors have read and  
46  
47 24 approved the final manuscript.  
48  
49 25

## 50 51 **COMPETING INTERESTS STATEMENT**

52  
53 27 JH has received an award from CSL Behring outside the submitted work. CZ had received  
54  
55 28 research grants from Pfizer, Celgene, Daiichi-Sankyo and is a consultant for Incyte, Sanofi and  
56  
57 29 Pfizer. FL has received unrestricted research grants from CSL Behring, Takeda and uniQure, and  
58  
59  
60

1 is consultant for Takeda, uniQure, and Biomarin. He is DSMB member for a study sponsored by  
2 Roche. RM has received travel grants from Shire and Bayer. MC has received grants from  
3 governmental research institutes such as NWO, ZonMW, Innovation fund, institutional grants  
4 and unrestricted investigator research grants/educational and travel funding from the following  
5 companies over the years: Pfizer, Baxter/Baxalta/Shire, Bayer Schering Pharma, CSL Behring,  
6 Sobi Biogen, Novo Nordisk, Novartis and Nordic Pharma, and has served as a member on  
7 steering boards of Roche, Bayer and Octapharma. The remaining authors declare no competing  
8 financial interests. All unrestricted research grants, awards, educational grants and consultancy  
9 fees of all authors were forwarded to the respective institutions.

#### 11 **THE OPTI-CLOT STUDY GROUP**

12 Steering Committee, the Netherlands: M.H. Cnossen (principal Investigator and chair OPTI-  
13 CLOT), F.W.G. Leebeek, Rotterdam; K. Fijnvandraat, R.A.A. Mathôt (co-investigator),  
14 Amsterdam; K. Meijer, Groningen. Local principal investigators, other local collaborators the  
15 Netherlands: M.J.H.A. Kruip, S. Polinder, Rotterdam; M. Coppens, Amsterdam; R.Y.J. Tamminga,  
16 K. Meijer, Groningen; B.A.P. Laros-van Gorkom, P. Brons, S.E.M. Schols, Nijmegen; F.J.M. van  
17 der Meer, H.C.J. Eikenboom, Leiden; R.E.G. Schutgens, K. Fischer, Utrecht; F. Heubel-Moenen,  
18 Maastricht; L. Nieuwenhuizen, Veldhoven; P. Ypma, The Hague; M.H.E. Driessens, Nijkerk. Trial  
19 bureau: C. M. Zwaan, I. van Vliet, Rotterdam. Principal investigators and local collaborators in  
20 the United Kingdom: P. W. Collins, Cardiff; R. Liesner, P. Chowdary, London; D. Keeling, Oxford.  
21 OPTI-CLOT PhDs: J. Lock, H.C.A.M. Hazendonk, I. van Moort, T. Preijers, J.M. Heijdra, N.C.B. de  
22 Jager, M.C.H.J. Goedhart, L.H. Bukkems, W. Al Arashi, M.E. Cloesmeijer, A. Janssen.

#### 24 **REFERENCES**

- 25 1. Leebeek FW, Eikenboom JC. Von Willebrand's Disease. *N Engl J Med* 2016;**375**(21):2067-80.
- 26 2. Sadler JE, Budde U, Eikenboom JCJ, et al. Update on the pathophysiology and classification of  
27 von Willebrand disease: A report of the Subcommittee on von Willebrand factor. *J*  
28 *Thromb Haemost* 2006;**4**(10):2103-14.
- 29 3. Lavin M, Aguila S, Schneppenheim S, et al. Novel insights into the clinical phenotype and  
30 pathophysiology underlying low VWF levels. *Blood* 2017;**130**(21):2344-53.

- 1 4. Hazendonk HCAM, Heijdra JM, de Jager NCB, et al. Analysis of current perioperative  
2 management with Haemate((R)) P/Humate P((R)) in von Willebrand disease: Identifying  
3 the need for personalized treatment. *Haemophilia* 2018.
- 4 5. Heijdra JM, Cnossen MH, Leebeek FWG. Current and Emerging Options for the Management  
5 of Inherited von Willebrand Disease. *Drugs* 2017.
- 6 6. Castaman G, Lethagen S, Federici AB, et al. Response to desmopressin is influenced by the  
7 genotype and phenotype in type 1 von Willebrand disease (VWD): Results from the  
8 European Study MCMDM-1VWD. *Blood* 2008;**111**(7):3531-39.
- 9 7. Federici AB, Mazurier C, Berntorp E, et al. Biologic response to desmopressin in patients with  
10 severe type 1 and type 2 von Willebrand disease: Results of a multicenter European  
11 study. *Blood* 2004;**103**(6):2032-38.
- 12 8. Lethagen S, Kyrle PA, Castaman G, et al. von Willebrand factor/factor VIII concentrate  
13 (Haemate® P) dosing based on pharmacokinetics: A prospective multicenter trial in  
14 elective surgery. *J Thromb Haemost* 2007;**5**(7):1420-30.
- 15 9. de Jager NCB, Bukkems LH, Heijdra JM, et al. One piece of the puzzle: Population  
16 pharmacokinetics of FVIII during perioperative Haemate P((R)) /Humate P((R))  
17 treatment in von Willebrand disease patients. *J Thromb Haemost* 2020;**18**(2):295-305.
- 18 10. de Jager NCB, Heijdra JM, Kieboom Q, et al. Population Pharmacokinetic Modeling of von  
19 Willebrand Factor Activity in von Willebrand Disease Patients after Desmopressin  
20 Administration. *Thromb Haemost* 2020;**120**(10):1407-16.
- 21 11. Mentré F, Mallet A. Handling covariates in population pharmacokinetics. *Int J Biomed*  
22 *Comput* 1994;**36**(1-2):25-33.
- 23 12. Dargaud Y, Delavenne X, Hart DP, et al. Individualized PK-based prophylaxis in severe  
24 haemophilia. *Haemophilia* 2018;**24 Suppl 2**:3-17.
- 25 13. De Wee EM, Leebeek FWG, Eikenboom JCJ. Diagnosis and management of von Willebrand  
26 Disease in the Netherlands. *Semin Thromb Hemost* 2011;**37**(5):480-87.
- 27 14. Myles PS, Cui J. Using the Bland-Altman method to measure agreement with repeated  
28 measures. *Br J Anaesth* 2007;**99**(3):309-11.

**Supplementary data**

1. Steering committee
2. List of participating centers and principal investigators
3. Monitoring and safety assurance
4. Handling and storage of data and documents
5. Amendments
6. Compensation for injury
7. Access to final trial dataset
8. Model for patient information and informed consent form (Dutch only).

## 1. Steering committee

### Coordinating investigator / project leader:

Dr. M.H. Cnossen, Pediatric Hematologist

Department of Pediatric Hematology, Erasmus MC – Sophia Children’s Hospital, University Medical Center Rotterdam, Rotterdam, the Netherlands

Email: [m.cnossen@erasmusmc.nl](mailto:m.cnossen@erasmusmc.nl)

### Co-project leader:

Prof. Dr. R.A.A. Mathôt, Hospital Pharmacist – Clinical Pharmacologist

Hospital Pharmacy – Clinical Pharmacology, Amsterdam UMC, University of Amsterdam, Amsterdam, the Netherlands

[r.mathot@amsterdamumc.nl](mailto:r.mathot@amsterdamumc.nl)

### Principal investigators:

See 2. List of participating centers and principal investigators

### Sponsor:

Prof. Dr. E.H.H.M. Rings, Head of Department of Pediatrics,

Erasmus MC- Sophia Children’s Hospital, University Medical Center Rotterdam, Rotterdam, the Netherlands

[e.rings@erasmusmc.nl](mailto:e.rings@erasmusmc.nl)



## 2. List of Participating Centers

Erasmus MC, University Medical Center Rotterdam, Rotterdam, the Netherlands

PI: Dr. M.H. Cnossen ([m.cnossen@erasmusmc.nl](mailto:m.cnossen@erasmusmc.nl))

Radboud University Medical Center, Nijmegen, the Netherlands

PI: Dr. S.E.M. Schols ([saskia.schols@radboudumc.nl](mailto:saskia.schols@radboudumc.nl))

University Medical Center Groningen, Groningen, the Netherlands

PI: Prof. Dr. K. Meijer ([k.meijer@umcg.nl](mailto:k.meijer@umcg.nl))

Amsterdam University Medical Center, Amsterdam, the Netherlands

PI: Prof. Dr. C.J. Fijnvandraat ([c.j.fijnvandraat@erasmusmc.nl](mailto:c.j.fijnvandraat@erasmusmc.nl))

Maastricht University Medical Center, Maastricht, the Netherlands

PI: Drs. F. Heubel-Moenen ([floor.moenen@mumc.nl](mailto:floor.moenen@mumc.nl))

Haga Hospital, The Hague, the Netherlands

PI: Dr. P. Ypma ([p.ypma@hagaziekenhuis.nl](mailto:p.ypma@hagaziekenhuis.nl))

Maxima Medical Center, Veldhoven, the Netherlands

PI: Dr. L. van Nieuwenhuizen ([laurens.nieuwenhuizen@mmc.nl](mailto:laurens.nieuwenhuizen@mmc.nl))

### 3. Handling and storage of data and documents

All data will be handled confidentially and will be filed in a coded database. A study number will be appointed to every patient. Individual patients can only be identified by participating investigators at the different sites by this number in combination with their hospital registration number. Handling of data will be done according to the Dutch Personal Data Protection Act. Blood samples will be handled confidentially and will be stored in the hemostasis laboratory in the Erasmus MC. Within a few weeks after discharge of a patient, a member of the study team will make an appointment to collect the blood samples. The samples will be stored for 15 years (and returned to the site, if demanded so by specific site-regulations).

#### 4. Monitoring and quality assurance

The risk for participating patients is minimal. Daily monitoring of plasma levels and subsequent adjustment of VWF-containing concentrate dosing according to the Dutch Hemophilia Consensus target levels, will ensure adequate FVIII and VWF levels to prevent bleeding. By following the Consensus, this therapeutic study poses no additional risk to the patients. Safety and quality of the study will be monitored once yearly at every participating site by an auditor independent from the sponsor and investigators.

For peer review only

## 5. Amendments

Amendments are changes made to the research after a favourable opinion by the accredited METC has been given. All amendments will be notified to the METC that gave a favourable opinion.

A 'substantial amendment' is defined as an amendment to the terms of the METC application, or to the protocol or any other supporting documentation, that is likely to affect to a significant degree:

- the safety or physical or mental integrity of the subjects of the trial;
- the scientific value of the trial;
- the conduct or management of the trial; or
- the quality or safety of any intervention used in the trial.

All substantial amendments will be notified to the METC and to the competent authority.

Non-substantial amendments will not be notified to the accredited METC and the competent authority, but will be recorded and filed by the sponsor.

All amendments will be communicated to all participating centers by the trial coordinator.

Changes regarding inclusion and exclusion criteria or study design, will also be communicated to [www.trialregister.nl](http://www.trialregister.nl) (NL7212).

## 6. Compensation for injury

The sponsor/investigator has a liability insurance which is in accordance with article 7, subsection 9 of the WMO. The sponsor/investigator has a liability insurance which is in accordance with article 7 of the WMO. The sponsor (also) has an insurance which is in accordance with the legal requirements in the Netherlands (Article 7 WMO). This insurance provides cover for damage to research subjects through injury or death caused by the study. The insurance applies to the damage that becomes apparent during the study or within 4 years after the end of the study.

For peer review only

## 7. Access to final trial dataset

The sponsor of the OPTI-CLOT: To WiN study will have access to the final dataset and will be the owner of all study data. However, all participating centers have access to their own data and will have permission to use these data for non-commercial research within their own center and to improve patient care. All publications regarding the OPTI-CLOT: To WiN study will be coordinated by the project leader. Other centers than the sponsor site may only publish data after permission from the sponsor and if the sponsor is not publishing the data within a fair amount of time after the study and data analysis has ended. All participating centers have contractual agreements with the sponsor regarding these matters.

## 8. Model for patient information and informed consent form.

# Proefpersoneninformatie voor deelname aan medisch-wetenschappelijk onderzoek

### **Onderzoek naar de effecten van farmacokinetische modellen bij het doseren DDAVP en/of stollingsfactorconcentraten bij patiënten met de ziekte van von Willebrand bij medische interventies**

---

Officiële titel: Implementatie van farmacokinetisch gestuurd doseren van DDAVP en VWF-bevattende stollingsfactorconcentraten bij von Willebrandziekte ("OPTI-CLOT: To-WiN")

#### **Informatie voor een patiënt met de ziekte van von Willebrand (≥16 jaar)**

Geachte heer/mevrouw,

Wij vragen u om mee te doen aan een medisch-wetenschappelijk onderzoek.

Meedoen is vrijwillig. Om mee te doen is wel uw schriftelijke toestemming nodig. U ontvangt deze brief omdat u de ziekte van Von Willebrand heeft en u binnenkort een ingreep ondergaat.

Voordat u beslist of u wilt meedoen aan dit onderzoek, krijgt u uitleg over wat het onderzoek inhoudt. Lees deze informatie rustig door en vraag de onderzoeker uitleg als u vragen heeft. U kunt ook de onafhankelijk deskundige, die aan het eind van deze brief genoemd wordt, om aanvullende informatie vragen. U kunt er ook over praten met uw partner, vrienden of familie.

Verdere informatie over meedoen aan zo'n onderzoek staat op de website van de Rijksoverheid: [www.rijksoverheid.nl/mensenonderzoek](http://www.rijksoverheid.nl/mensenonderzoek).

#### **Algemene informatie**

Dit onderzoek is opgezet door het Erasmus MC en wordt gedaan door artsen in verschillende ziekenhuizen in Nederland. Er zullen naar verwachting 120 proefpersonen meedoen; zowel volwassenen als kinderen van alle leeftijden. De medisch-ethische toetsingscommissie heeft dit onderzoek goedgekeurd. Algemene informatie over de toetsing van onderzoek vindt u op de website van de Rijksoverheid: [www.rijksoverheid.nl/mensenonderzoek](http://www.rijksoverheid.nl/mensenonderzoek).

#### **1. Doel van het onderzoek**

Het doel van dit onderzoek is uitzoeken of een nieuwe manier van doseren (doseren op basis van farmacokinetische modellen, ook wel PK-modellen genoemd) van DDAVP en/of stollingsfactorconcentraat toepasbaar is in de praktijk. Deze PK-modellen zullen daarom onderzocht worden in verschillende situaties: tijdens DDAVP-testen, bij de behandeling van bloedingen, en bij de

1  
2  
3 behandeling rondom medische ingrepen (zoals operatie, tandheelkundig ingreep, kijkonderzoek van  
4 darm en bevalling in het ziekenhuis).

## 6 7 **2. Achtergrond van het onderzoek**

8 Patiënten met de ziekte van Von Willebrand worden rondom medische ingrepen behandeld met DDAVP  
9 en/of een stollingsfactorconcentraat. Deze medicatie wordt tot nu toe op grond van het  
10 lichaamsgewicht gedoseerd. Echter, de medicatie gedraagt zich bij elke persoon verschillend. Dit wordt  
11 grotendeels bepaald door hoe het lichaam met het medicijn omgaat. Dit wordt “farmacokinetiek” (PK)  
12 genoemd. Op basis van gegevens van patiënten die eerder met deze medicatie zijn behandeld, zijn PK-  
13 modellen gemaakt. Met deze modellen is het mogelijk geworden om een beter inzicht te krijgen in hoe  
14 het lichaam van verschillende patiënten met het medicijn om zal gaan. In de toekomst kunnen wij  
15 hiermee per persoon voorspellen hoe vaak en in welke dosering de medicatie gegeven moet worden.  
16 Hiermee voorkomen we dat we óf te weinig, óf te veel medicatie geven.

## 21 22 **3. Wat meedoen inhoudt**

23 Als u meedoet, duurt dat totaal enkele dagen tot weken voor u, afhankelijk van het soort behandeling.

### 25 26 **Behandeling**

27 Rondom de ingreep die u zult ondergaan, wordt u behandeld met DDAVP en/of  
28 stollingsfactorconcentraat. De keuze voor het soort medicatie wordt bepaald door uw behandelend arts  
29 (hematoloog) en is hetzelfde als wanneer u niet zou meedoen aan het onderzoek. Als u meedoet aan  
30 het onderzoek zal op een andere, specifiekere manier bepaald worden hoeveel van het medicijn u krijgt  
31 en hoe vaak. In dit onderzoek zal dit worden berekend op basis van uw persoonlijke gegevens en uw  
32 persoonlijke PK-profiel, gecombineerd met het algemene PK-model. Dit verschilt van de normale  
33 situatie, waarin de dosis op basis van uw lichaamsgewicht wordt bepaald.

37 Omdat de ingreep die u zult ondergaan pas over enige tijd zal plaatsvinden, geeft dit gelegenheid om bij  
38 u van tevoren een persoonlijk PK-profiel op te stellen. Hierbij worden als u behandeld wordt met  
39 DDAVP, indien mogelijk, de gegevens van een eerdere DDAVP-test gebruikt. U hoeft dan niet extra naar  
40 het ziekenhuis te komen. In de andere gevallen (als u geen bruikbare DDAVP test heeft en behandeling  
41 met DDAVP moet ondergaan, of als u een behandeling met stollingsfactorconcentraat gaat krijgen)  
42 willen wij graag een testdosis van de medicatie toedienen en op meerdere momenten bloed bij u  
43 afnemen om het persoonlijke PK-profiel te maken.

### 47 48 **Bezoeken en metingen**

49 Naast de gebruikelijke handelingen die worden gedaan ter voorkoming van een bloeding rondom de  
50 ingreep, zult u in het kader van het onderzoek eenmalig gewogen worden, en er wordt een “lean body  
51 mass” meting gedaan (meting van de vetvrije massa van het lichaam).



1  
2  
3 Er wordt extra bloed afgenomen om de hoeveelheid stollingsfactoren in uw bloed te bepalen en  
4 mogelijk krijgt u een testdosis DDAVP en/of stollingsfactorconcentraat toegediend. Het kan zijn dat u  
5 hiervoor extra naar het ziekenhuis moet komen.  
6

7  
8 Voor een schematisch overzicht van de onderzoekshandelingen, zie **bijlage C**: overzicht  
9 onderzoekshandelingen.  
10

#### 11 **4. Wat wordt er van u verwacht**

  
12

13 Om het onderzoek goed te laten verlopen, is het belangrijk dat u zich aan de volgende afspraken houdt.  
14

15 De afspraken zijn dat u:

- 16 - niet ook nog aan een ander medisch-wetenschappelijk onderzoek meedoet.
- 17 - afspraken voor bezoeken nakomt.  
18  
19  
20

21 Het is belangrijk dat u contact opneemt met de onderzoeker:

- 22 - voordat u andere geneesmiddelen gaat gebruiken. Ook als dat homeopathische  
23 geneesmiddelen, natuurgeneesmiddelen, vitaminen en/of geneesmiddelen van de drogist zijn.
- 24 - als u in een ziekenhuis wordt opgenomen of behandeld.
- 25 - u plotseling gezondheidsklachten krijgt.
- 26 - u een bloeding krijgt na de ingreep.
- 27 - u niet meer wilt meedoen aan het onderzoek.
- 28 - als uw contactgegevens wijzigen.  
29  
30  
31  
32

#### 33 **Zwangerschap**

  
34

35 Bent u zwanger, of wordt u zwanger tijdens het onderzoek? Laat dit dan direct weten aan uw behandeld  
36 arts. Hij/zij zal dan beslissen of uw behandeling moet worden aangepast.  
37

#### 38 **5. Mogelijke bijwerkingen/complicaties en ongemakken**

  
39

40 Het geneesmiddel dat u tijdens het onderzoek krijgt, is hetzelfde middel als dat u krijgt als u niet  
41 meedoet aan het onderzoek. Er zijn daarom geen andere bijwerkingen te verwachten dan tijdens de  
42 standaard behandeling rondom een ingreep.  
43  
44

#### 45 **Metingen**

  
46

47 Bij de eenmalige "lean body mass" meting ligt u op de onderzoeksbank, waarna er een sticker met  
48 elektrode op uw hand en voet geplakt wordt. Op deze elektroden wordt een apparaatje aangesloten,  
49 waarop de onderzoeker de gegevens over uw lichaamssamenstelling kan aflezen. Dit onderzoek is niet  
50 pijnlijk.  
51  
52

53 Bloedafnames kunnen pijn doen of een bloeduitstorting geven. Alles bij elkaar nemen we, afhankelijk  
54 van welk geneesmiddel u krijgt, tussen de 60 en 80 ml extra bloed bij u af. Deze hoeveelheid geeft geen  
55 problemen. Ter vergelijking: bij de bloedbank wordt 500 ml per keer afgenomen.  
56  
57  
58  
59  
60

## 6. Mogelijke voor- en nadelen

Het is belangrijk dat u de mogelijk voor- en nadelen goed afweegt voordat u besluit mee te doen.

U heeft zelf geen direct voordeel van dit onderzoek. Voor de toekomst kan het onderzoek wel nuttige gegevens opleveren. Mogelijk krijgt u door mee te doen aan het onderzoek een dosering van het geneesmiddel die beter bij uw lichaam past, waardoor wordt voorkomen dat er te veel of te weinig wordt gegeven rondom een ingreep. Dit kan een voordeel opleveren. Zoals gebruikelijk worden de waarden van de stollingsfactoren in uw bloed nauwkeurig gecontroleerd, waardoor u geen gevaar loopt en de behandelaar steeds op de hoogte is of u voldoende van het geneesmiddel krijgt toegediend om bloedingen te voorkomen. Wanneer wij besluiten om bij elke patiënt in de toekomst een farmacokinetisch model te maken voor de ingreep, kunnen we de in dit onderzoek verzamelde gegevens mogelijk in de toekomst voor uw behandeling gebruiken en hoeft u dan niet extra te worden geprikt. Dit kan ook een voordeel zijn.

Nadelen van meedoen aan het onderzoek kunnen zijn:

- mogelijke ongemakken van de metingen in het onderzoek (zie punt 5)

Deelname aan het onderzoek betekent ook:

- dat u extra tijd kwijt bent;
- extra bloedafnames;
- dat u mogelijk meerdere keren extra naar het ziekenhuis moet komen;
- dat u afspraken heeft waaraan u zich moet houden

Al deze zaken zijn hiervoor onder punt 3, 4 en 5 beschreven.

## 7. Als u niet wilt meedoen of wilt stoppen met het onderzoek

U beslist zelf of u meedoet aan het onderzoek. Deelname is vrijwillig. Als u niet wilt meedoen, wordt u rondom de ingreep op de gebruikelijke manier behandeld voor uw von Willebrandziekte, en de geneesmiddelen zullen op de gebruikelijke manier gedoseerd worden. De onderzoeker kan u meer vertellen over de behandelingsmogelijkheden die er zijn en de voor- en nadelen daarvan.

Als u wel meedoet, kunt u zich altijd bedenken en toch stoppen, ook tijdens het onderzoek. U wordt dan weer op de gebruikelijke manier behandeld voor uw von Willebrandziekte. U hoeft niet te zeggen waarom u stopt. Wel moet u dit direct melden aan de onderzoeker. De gegevens die tot dat moment zijn verzameld, worden gebruikt voor onderzoek. Als u wilt, kan verzameld lichaamsmateriaal worden vernietigd.

Als er nieuwe informatie over het onderzoek is die belangrijk voor u is, laat de behandelend arts dit aan u weten. U wordt dan gevraagd of uw blijft meedoen.

## 8. Einde van het onderzoek

Uw deelname aan het onderzoek stopt als

- alle bezoeken en bloedafnames volgens het schema voorbij zijn
- u zelf kiest om te stoppen
- de onderzoeker het beter voor u vindt om te stoppen
- de overheid of de beoordelende medisch-ethische toetsingscommissie besluit om het onderzoek te stoppen

Het hele onderzoek is afgelopen als alle deelnemers klaar zijn. Na het verwerken van alle gegevens informeert de onderzoeker u over de belangrijkste uitkomsten van het onderzoek.

## 9. Gebruik en bewaren van uw gegevens en lichaamsmateriaal

Voor dit onderzoek worden uw persoonsgegevens en lichaamsmateriaal verzameld, gebruikt en bewaard. Het gaat om gegevens zoals naam, adres, geboortedatum en om gegevens over uw gezondheid. Het gaat bij dit onderzoek om uitslagen van bloed. Gebruik en bewaring van uw gegevens en lichaamsmateriaal is nodig om de wetenschappelijke vraagstelling van dit onderzoek te kunnen beantwoorden en over de resultaten te publiceren. U wordt gevraagd om hiervoor toestemming te geven. Als u dat niet wilt, kunt u niet deelnemen aan dit onderzoek.

### Vertrouwelijkheid van uw gegevens en lichaamsmateriaal

Om uw privacy te beschermen, worden uw gegevens en het lichaamsmateriaal voorzien van een code. De naam en andere gegevens die u direct kunnen identificeren worden apart bewaard. Alleen met de sleutel van de code zijn gegevens tot u te herleiden. De sleutel van de code blijft bij de onderzoeker. Naar de sponsor/opdrachtgever en andere bij het onderzoek betrokken partijen worden uw gegevens en lichaamsmateriaal alleen onder die code verstuurd. Ook in rapporten en publicaties over het onderzoek worden alleen de gecodeerde gegevens van u vermeld.

### Controle en inzage in uw gegevens

Sommige personen en instanties moeten inzage kunnen hebben in al uw gegevens. Ook in de gegevens zonder code. Dit is nodig om te kunnen controleren of het onderzoek goed en betrouwbaar is uitgevoerd. Personen en instanties die ter controle toegang krijgen tot uw gegevens: medewerkers van het onderzoeksteam, de veiligheidscommissie die het onderzoek in de gaten houdt, een controleur die door de opdrachtgever van het onderzoek is ingehuurd, nationale en internationale toezichthoudende autoriteiten, bijvoorbeeld de Inspectie Gezondheidszorg en Jeugd.

Zij zullen uw gegevens geheim houden. U wordt gevraagd voor deze inzage toestemming te geven. Indien u dat niet wilt, kunt u niet deelnemen aan dit onderzoek.

### **Bewaartermijn gegevens en lichaamsmateriaal**

Op de onderzoekslocatie (het ziekenhuis) en bij de opdrachtgever worden uw gegevens gedurende de wettelijk voorgeschreven termijn bewaard, de wettelijk voorgeschreven termijn is 15 jaar.

Het van u verkregen lichaamsmateriaal wordt niet onmiddellijk na analyse vernietigd. Uw lichaamsmateriaal wordt bewaard om in de loop van dit onderzoek daarop nog nieuwe analyses/bepalingen te kunnen doen.

### **Bewaring en gebruik van gegevens en lichaamsmateriaal voor ander onderzoek**

Na afloop van dit onderzoek kunnen uw gegevens en lichaamsmateriaal nog van belang zijn voor het uitvoeren van ander onderzoek. U wordt gevraagd toestemming te geven voor dit langer bewaren en voor gebruik in ander, toekomstig, onderzoek op het gebied van uw aandoening. Indien u dat niet wilt, kunt u gewoon deelnemen aan het huidige onderzoek.

### **Informatie over onverwachte bevindingen**

Tijdens dit onderzoek kan er bij toeval iets gevonden worden dat niet van belang is voor het onderzoek maar wel voor u. Als dit belangrijk is voor uw gezondheid, dan zal je op de hoogte worden gesteld door de onderzoeker. U kunt dan met de behandelend arts bespreken wat er gedaan moet worden. Ook hiervoor geeft u toestemming.

### **Intrekken toestemming**

U kunt uw toestemming altijd weer intrekken, voor wat betreft dit onderzoek en voor wat betreft het toekomstig onderzoek. De reeds over u verzamelde gegevens zullen dan nog wel worden gebruikt in het onderzoek. Uw lichaamsmateriaal zal na intrekking van uw toestemming worden vernietigd. Als er al metingen in dat lichaamsmateriaal zijn gedaan, dan worden de resultaten nog wel gebruikt in het onderzoek. Indien u wilt dat al de gegevens over u worden verwijderd, dan kunt u daarom verzoeken.

### **Meer informatie over de rechten bij verwerking van gegevens**

Voor meer informatie over de naleving van uw rechten bij de verwerking van uw persoonsgegevens kunt u contact opnemen met de verantwoordelijke voor de verwerking van jouw persoonsgegevens. Voor dit onderzoek is het Erasmus MC is verantwoordelijk voor de naleving van de regels voor de verwerking van uw persoonsgegevens.

Bij vragen of klachten over de verwerking van uw persoonsgegevens raden we u aan eerst contact op te nemen met de onderzoekslocatie. U kunt ook contact opnemen met de Functionaris voor de Gegevensbescherming van de instelling of de Autoriteit Persoonsgegevens. Voor contactgegevens zie bijlage A.

Meer informatie over uw rechten bij de verwerking van uw persoonsgegevens kunt u vinden op de website van de Autoriteit Persoonsgegevens:

1  
2  
3 ([https://autoriteitpersoonsgegevens.nl/nl/onderwerpen/avg-nieuweeuropese-](https://autoriteitpersoonsgegevens.nl/nl/onderwerpen/avg-nieuweeuropese-privacywetgeving/controle-over-je-data)  
4 [privacywetgeving/controle-over-je-data](https://autoriteitpersoonsgegevens.nl/nl/onderwerpen/avg-nieuweeuropese-privacywetgeving/controle-over-je-data)).  
5

## 6 **Registratie van het onderzoek**

7  
8 Dit onderzoek staat ook in een overzicht van medisch-wetenschappelijke onderzoeken, namelijk op  
9  
10 [www.trialregister.nl](http://www.trialregister.nl). Deze website bevat geen informatie die herleidbaar is tot u als persoon. Wel kan  
11 de website een samenvatting van de resultaten van dit onderzoek tonen. U vindt dit onderzoek onder  
12 "OPTI-CLOT: To WiN".  
13  
14

## 15 **10. Verzekering voor proefpersonen**

16  
17 Voor iedereen die meedoet aan dit onderzoek is een verzekering afgesloten. De verzekering dekt schade  
18 door het onderzoek. Niet alle schade is gedekt. In **bijlage B** vindt u meer informatie over de verzekering.  
19 Daar staat ook aan wie u schade kunt melden.  
20  
21

## 22 **11. Vergoeding voor meedoen**

23  
24 De extra testen en ziekenhuisbezoeken voor het onderzoek kosten u niets. U wordt niet betaald voor  
25 het meedoen aan dit onderzoek. Wel krijgt u een vergoeding voor de reis- en parkeerkosten als u naar  
26 het ziekenhuis komt voor het maken van een PK-profiel.  
27  
28

## 29 **12. Heeft u vragen?**

30  
31 Bij vragen kunt u contact opnemen met de onderzoeker of uw behandeld arts. Voor onafhankelijk advies  
32 over meedoen aan dit onderzoek kunt u terecht bij de onafhankelijke arts. Hij weet veel over het  
33 onderzoek, maar heeft niet te maken met dit onderzoek.  
34  
35

36  
37 Bij klachten kunt u het beste terecht bij de klachtenfunctionaris/-commissie van uw ziekenhuis. Alle  
38 gegevens vindt u in **bijlage A**: Contactgegevens.  
39

## 40 **13. Ondertekening toestemmingsformulier**

41  
42 Wanneer u voldoende bedenktijd heeft gehad, wordt u gevraagd te beslissen over deelname aan dit  
43 onderzoek. Indien u toestemming geeft, zullen wij u vragen deze op de bijbehorende  
44 toestemmingsverklaring schriftelijk te bevestigen. Door uw schriftelijke toestemming geeft u aan dat u  
45 de informatie heeft begrepen en instemt met deelname aan het onderzoek. Het handtekeningenblad  
46 wordt door de onderzoeker bewaard. U krijgt een kopie of een tweede exemplaar van deze  
47 toestemmingsverklaring.  
48  
49

50  
51  
52  
53 Met vriendelijke groet,

54  
55 De "OPTI-CLOT: To-WiN" onderzoeksgroep  
56  
57  
58  
59

1  
2  
3 **14. Bijlagen bij deze informatie**  
4

5 A. Contactgegevens  
6

7 B. Informatie over de verzekering  
8

9 C. Schema onderzoekshandelingen  
10

11 D. Toestemmingsformulier  
12  
13  
14  
15  
16  
17  
18  
19  
20  
21  
22  
23  
24  
25  
26  
27  
28  
29  
30  
31  
32  
33  
34  
35  
36  
37  
38  
39  
40  
41  
42  
43  
44  
45  
46  
47  
48  
49  
50  
51  
52  
53  
54  
55  
56  
57  
58  
59  
60

For peer review only

## Bijlage A: contactgegevens

### Contactgegevens Erasmus MC

Bij vragen of opmerkingen kunt u contact opnemen met drs. W. Al Arashi, arts-onderzoeker, via telefoonnummer 06-34861847 (studietelefoon OPTI-CLOT studies).

U kunt ook contact opnemen met de hoofdonderzoeker Dr. M.H. Cnossen, kinderarts-hematoloog, via telefoonnummer 010-7036691.

Of met een van de andere onderzoekers:

Artsen Hematologie: tel: 010-7030148.

Hemofilieverpleegkundigen: tel. 06-12623034.

### Onafhankelijk deskundige

Als u twijfelt over deelname aan dit onderzoek, dan kunt u ook een onafhankelijk arts raadplegen, die zelf niet bij het onderzoek betrokken is, maar wel deskundig is op dit gebied: Prof. dr. H.A.W.M. Tiddens, kinderarts, tel. 010-7036690.

Ook als u vragen voor of tijdens het onderzoek hebt die u liever niet aan de onderzoekers stelt kunt u contact opnemen met de onafhankelijk arts.

### Klachtencommissie

Als u niet tevreden bent over het onderzoek of de behandeling, dan kunt u terecht bij de onafhankelijke klachtencommissie van het ziekenhuis. U kunt zich dan wenden tot:

De secretaris van de klachtencommissie Erasmus MC

Postbus 2040

3000 CA Rotterdam

Tel. 010-7033198

### Functionaris Gegevensbescherming voor het Erasmus MC:

Dhr. P. van Hoogdalem

Bereikbaar via het secretariaat van de Afdeling Juridische Zaken, tel. 010-7034986.

## Bijlage B: informatie over de verzekering

Voor iedereen die meedoet aan dit onderzoek, heeft het Erasmus MC een verzekering afgesloten. De verzekering dekt schade door deelname aan het onderzoek. Dit geldt voor schade tijdens het onderzoek of binnen vier jaar na het einde ervan. Schade moet u binnen die vier jaar aan de verzekeraar hebben gemeld.

De verzekering dekt niet alle schade. Onderaan deze tekst staat in het kort welke schade niet wordt gedekt.

Deze bepalingen staan in het Besluit verplichte verzekering bij medisch-wetenschappelijk onderzoek met mensen. Dit besluit staat op [www.ccmo.nl](http://www.ccmo.nl), de website van de Centrale Commissie Mensgebonden Onderzoek (zie 'Bibliotheek' en dan 'Wet- en regelgeving').

Bij schade kunt u direct contact leggen met de verzekeraar.

De verzekeraar van het onderzoek is:

Naam: CNA Insurance Company Limited

Adres: Strawinskylaan 703, 1077 XX Amsterdam

Telefoonnummer: +31 (0)20 573 72 74

E-mail: [Esther.vanherk@cna Hardy.com](mailto:Esther.vanherk@cna Hardy.com)

(Polisnummer: CT CNA-2015 HCCD0416C)

(Contactpersoon: Esther van Herk)

De verzekering biedt een dekking van € 650.000 per proefpersoon en € 5.000.000 voor het hele onderzoek (en € 7.500.000 per jaar voor alle onderzoeken van dezelfde opdrachtgever).

De verzekering dekt de volgende schade **niet**:

- schade door een risico waarover u in de schriftelijke informatie bent ingelicht. Dit geldt niet als het risico zich ernstiger voordoet dan was voorzien of als het risico heel onwaarschijnlijk was;
- schade aan uw gezondheid die ook zou zijn ontstaan als u niet aan het onderzoek had meegedaan;
- schade door het niet (volledig) opvolgen van aanwijzingen of instructies;
- schade aan uw nakomelingen, als gevolg van een negatief effect van het onderzoek op u of uw nakomelingen;
- schade door een bestaande behandelmethode bij onderzoek naar bestaande behandelmethoden.



## Bijlage C: overzicht onderzoekshandelingen

### 1. Indien u rondom de ingreep behandeld wordt met DDAVP

Dan dient u een relatief recente DDAVP-test te hebben of ondergaat u een DDAVP-test (indien uw behandeld arts het noodzakelijk vindt om een nieuwe DDAVP-test te doen, of als u nog nooit een DDAVP-test hebt gehad).

Als u eerst een DDAVP-test krijgt, zullen bij de start van de DDAVP-test 3-4 extra buisjes bloed worden afgenomen voor onderzoeksdoeleinden. Als u geen DDAVP-test meer hoeft te ondergaan voor de start van de ingreep, dan zullen 7 tot 9 extra buisjes bloed worden afgenomen vlak voor de ingreep. Bij de start van de DDAVP-test, of in de periode voor de ingreep zult u gewogen worden en een "lean body mass" meting krijgen.

### 2. Indien u rondom de ingreep behandeld wordt met stollingsfactorconcentraat

Voor het onderzoek is het nodig dat u in de periode voor de ingreep eenmalig op 3 achtereenvolgende dagen naar het ziekenhuis komt.

Tijdens deze bezoeken gebeurt het volgende:

- Dag 1: u wordt gewogen en er wordt een "lean body mass" meting gedaan. Er wordt bloed afgenomen (6 buisjes). Meteen hierna krijgt u eenmalig een dosering stollingsfactorconcentraat toegediend. Vervolgens wordt 10 minuten na de testdosis weer bloed afgenomen (4 buisjes). Twee tot zes uur na de toediening van de testdosis wordt nogmaals bloed afgenomen (4 buisjes). Het precieze tijdstip van deze bloedafname spreekt u af met de onderzoeker. Tussen de 2<sup>e</sup> en 3<sup>e</sup> bloedafname hoeft u niet in het ziekenhuis te blijven.
- Dag 2: ongeveer 24 uur na het toedienen van het stollingsfactorconcentraat wordt bloed afgenomen (4 buisjes), dit duurt ongeveer 15 minuten.
- Dag 3: ongeveer 48 uur na het toedienen van het stollingsfactorconcentraat wordt bloed afgenomen (4 buisjes), dit duurt ongeveer 15 minuten.

| In de periode voor de ingreep: eenmalig opstellen van een PK-profiel:                                                                                                                                                                                                                                                           |                                                                                   |                                                                                     |
|---------------------------------------------------------------------------------------------------------------------------------------------------------------------------------------------------------------------------------------------------------------------------------------------------------------------------------|-----------------------------------------------------------------------------------|-------------------------------------------------------------------------------------|
| <b>Dag 1:</b>                                                                                                                                                                                                                                                                                                                   | <b>Dag 2:</b>                                                                     | <b>Dag 3:</b>                                                                       |
| <ul style="list-style-type: none"> <li>- Weegen en "lean body mass" meting</li> <li>- Bloedafname (direct voor toediening testdosis)</li> <li>- Toediening testdosis stollingsfactorconcentraat</li> <li>- Bloedafname (10 minuten na toediening testdosis)</li> <li>- Bloedafname (2-6 uur na toediening testdosis)</li> </ul> | Bloedafname (+/-24 uur na testdosis)                                              | Bloedafname (+/-48 uur na toediening testdosis)                                     |
|                                                                                                                                                                                                                                                |  |  |

Aan de hand van de uitslagen van deze bloedafnames wordt voor u een persoonlijk farmacokinetisch model gemaakt. Rondom de ingreep wordt de dosering van het stollingsfactorconcentraat bepaald aan de hand van het farmacokinetisch model gebaseerd op gegevens van eerdere geopereerde patiënten, gecombineerd met uw persoonlijke model en de uitslagen van de dagelijkse bloedafnames na de ingreep.

### 3. Indien u behandeld wordt met DDAVP én stollingsfactorconcentraat

Dan dien je een relatief recente DDAVP-test te hebben of ondergaat u een DDAVP-test (indien uw behandelend arts het noodzakelijk vindt om een nieuwe DDAVP-test te doen, of als u nog nooit een DDAVP-test hebt gehad) (zie kopje 1).

Daarnaast zal een persoonlijk farmacokinetisch profiel gemaakt worden na toediening van stollingsfactorconcentraat (zie kopje 2). Tussen de eventuele DDAVP-test en het toedienen van stollingsfactorconcentraat voor het farmacokinetisch profiel moeten minstens 3 dagen zitten.

## Bijlage D: toestemmingsformulier volwassenen – medische interventies

### Onderzoek naar de effecten van farmacokinetische modellen bij het doseren DDAVP en/of stollingsfactorconcentraten bij patiënten met de ziekte van von Willebrand bij medische interventies

- Ik heb de informatiebrief gelezen. Ook kon ik vragen stellen. Mijn vragen zijn voldoende beantwoord. Ik had genoeg tijd om te beslissen of ik meedoe.
- Ik weet dat meedoen vrijwillig is. Ook weet ik dat ik op ieder moment kan beslissen om toch niet mee te doen of te stoppen met het onderzoek. Daarvoor hoef ik geen reden te geven.
- Ik weet dat voor de controle van het onderzoek sommige mensen mijn gegevens kunnen inzien. Die mensen staan vermeld in deze informatiebrief. Ik geef toestemming voor die inzage.
- Ik geef toestemming voor het verzamelen en gebruiken van mijn gegevens en bloedmonsters op de manier en voor de doelen die in de informatiebrief staan.
- Ik geef  **wel**
  - geen** toestemming om mijn lichaamsmateriaal nog 15 jaar na dit onderzoek te bewaren. Mogelijk kan dit later nog voor ander/meer onderzoek worden gebruikt, zoals in de informatiebrief staat.
- Ik geef  **wel**
  - geen** toestemming om mij na dit onderzoek opnieuw te benaderen voor een vervolgonderzoek.

1  
2  
3 Ik wil meedoen aan dit onderzoek.  
4  
5

6  
7 Naam proefpersoon:  
8  
9

10  
11 Handtekening:

Datum: \_\_/\_\_/\_\_

12  
13  
14  
15  
16  
17  
18 Ik verklaar dat ik deze proefpersoon volledig heb geïnformeerd over het genoemde onderzoek.  
19

20 Als er tijdens het onderzoek informatie bekend wordt die de toestemming van de proefpersoon zou  
21 kunnen beïnvloeden, dan breng ik hem/haar daarvan tijdig op de hoogte.  
22

23 Naam onderzoeker (of diens vertegenwoordiger):  
24  
25

26  
27  
28 Handtekening:

Datum: \_\_/\_\_/\_\_

29  
30  
31  
32 *De proefpersoon krijgt een volledige informatiebrief mee, samen met een kopie van het getekende*  
33 *toestemmingsformulier.*  
34  
35  
36  
37  
38  
39  
40  
41  
42  
43  
44  
45  
46  
47  
48  
49  
50  
51  
52  
53  
54  
55  
56  
57  
58  
59  
60

# Reporting checklist for protocol of a clinical trial.

Based on the SPIRIT guidelines.

## Instructions to authors

Complete this checklist by entering the page numbers from your manuscript where readers will find each of the items listed below.

Your article may not currently address all the items on the checklist. Please modify your text to include the missing information. If you are certain that an item does not apply, please write "n/a" and provide a short explanation.

Upload your completed checklist as an extra file when you submit to a journal.

In your methods section, say that you used the SPIRIT reporting guidelines, and cite them as:

Chan A-W, Tetzlaff JM, Gøtzsche PC, Altman DG, Mann H, Berlin J, Dickersin K, Hróbjartsson A, Schulz KF, Parulekar WR, Krleža-Jerić K, Laupacis A, Moher D. SPIRIT 2013 Explanation and Elaboration: Guidance for protocols of clinical trials. *BMJ*. 2013;346:e7586

|                                             |                     | Reporting Item                                                                                               | Page Number                     |
|---------------------------------------------|---------------------|--------------------------------------------------------------------------------------------------------------|---------------------------------|
| <b>Administrative information</b>           |                     |                                                                                                              |                                 |
| Title                                       | <a href="#">#1</a>  | Descriptive title identifying the study design, population, interventions, and, if applicable, trial acronym | 1                               |
| Trial registration                          | <a href="#">#2a</a> | Trial identifier and registry name. If not yet registered, name of intended registry                         | 3,6,15                          |
| Trial registration: data set                | <a href="#">#2b</a> | All items from the World Health Organization Trial Registration Data Set                                     | www.trialregister.nl:<br>NL7212 |
| Protocol version                            | <a href="#">#3</a>  | Date and version identifier                                                                                  | n/a                             |
| Funding                                     | <a href="#">#4</a>  | Sources and types of financial, material, and other support                                                  | 15                              |
| Roles and responsibilities: contributorship | <a href="#">#5a</a> | Names, affiliations, and roles of protocol contributors                                                      | 1                               |

|    |                      |                     |                                                     |        |
|----|----------------------|---------------------|-----------------------------------------------------|--------|
| 1  | Roles and            | <a href="#">#5b</a> | Name and contact information for the trial          | Supp 2 |
| 2  | responsibilities:    |                     | sponsor                                             |        |
| 3  | sponsor contact      |                     |                                                     |        |
| 4  | information          |                     |                                                     |        |
| 5  |                      |                     |                                                     |        |
| 6  |                      |                     |                                                     |        |
| 7  |                      |                     |                                                     |        |
| 8  | Roles and            | <a href="#">#5c</a> | Role of study sponsor and funders, if any, in       | Supp 7 |
| 9  | responsibilities:    |                     | study design; collection, management,               |        |
| 10 | sponsor and funder   |                     | analysis, and interpretation of data; writing of    |        |
| 11 |                      |                     | the report; and the decision to submit the          |        |
| 12 |                      |                     | report for publication, including whether they      |        |
| 13 |                      |                     | will have ultimate authority over any of these      |        |
| 14 |                      |                     | activities                                          |        |
| 15 |                      |                     |                                                     |        |
| 16 |                      |                     |                                                     |        |
| 17 |                      |                     |                                                     |        |
| 18 |                      |                     |                                                     |        |
| 19 | Roles and            | <a href="#">#5d</a> | Composition, roles, and responsibilities of the     | Supp 1 |
| 20 | responsibilities:    |                     | coordinating centre, steering committee,            |        |
| 21 | committees           |                     | endpoint adjudication committee, data               |        |
| 22 |                      |                     | management team, and other individuals or           |        |
| 23 |                      |                     | groups overseeing the trial, if applicable (see     |        |
| 24 |                      |                     | Item 21a for data monitoring committee)             |        |
| 25 |                      |                     |                                                     |        |
| 26 |                      |                     |                                                     |        |
| 27 |                      |                     |                                                     |        |
| 28 |                      |                     |                                                     |        |
| 29 | <b>Introduction</b>  |                     |                                                     |        |
| 30 |                      |                     |                                                     |        |
| 31 | Background and       | <a href="#">#6a</a> | Description of research question and                | 5,6    |
| 32 | rationale            |                     | justification for undertaking the trial, including  |        |
| 33 |                      |                     | summary of relevant studies (published and          |        |
| 34 |                      |                     | unpublished) examining benefits and harms for       |        |
| 35 |                      |                     | each intervention                                   |        |
| 36 |                      |                     |                                                     |        |
| 37 |                      |                     |                                                     |        |
| 38 |                      |                     |                                                     |        |
| 39 | Background and       | <a href="#">#6b</a> | Explanation for choice of comparators               | 5      |
| 40 | rationale: choice of |                     |                                                     |        |
| 41 | comparators          |                     |                                                     |        |
| 42 |                      |                     |                                                     |        |
| 43 |                      |                     |                                                     |        |
| 44 |                      |                     |                                                     |        |
| 45 | Objectives           | <a href="#">#7</a>  | Specific objectives or hypotheses                   | 6      |
| 46 |                      |                     |                                                     |        |
| 47 | Trial design         | <a href="#">#8</a>  | Description of trial design including type of trial | 6      |
| 48 |                      |                     | (eg, parallel group, crossover, factorial, single   |        |
| 49 |                      |                     | group), allocation ratio, and framework (eg,        |        |
| 50 |                      |                     | superiority, equivalence, non-inferiority,          |        |
| 51 |                      |                     | exploratory)                                        |        |
| 52 |                      |                     |                                                     |        |
| 53 |                      |                     |                                                     |        |
| 54 |                      |                     |                                                     |        |
| 55 | <b>Methods:</b>      |                     |                                                     |        |
| 56 | <b>Participants,</b> |                     |                                                     |        |
| 57 |                      |                     |                                                     |        |
| 58 |                      |                     |                                                     |        |
| 59 |                      |                     |                                                     |        |
| 60 |                      |                     |                                                     |        |

## interventions, and outcomes

|                                 |                      |                                                                                                                                                                                                                                                                                                                                                                                |           |
|---------------------------------|----------------------|--------------------------------------------------------------------------------------------------------------------------------------------------------------------------------------------------------------------------------------------------------------------------------------------------------------------------------------------------------------------------------|-----------|
| Study setting                   | <a href="#">#9</a>   | Description of study settings (eg, community clinic, academic hospital) and list of countries where data will be collected. Reference to where list of study sites can be obtained                                                                                                                                                                                             | 7, supp 2 |
| Eligibility criteria            | <a href="#">#10</a>  | Inclusion and exclusion criteria for participants. If applicable, eligibility criteria for study centres and individuals who will perform the interventions (eg, surgeons, psychotherapists)                                                                                                                                                                                   | 7         |
| Interventions: description      | <a href="#">#11a</a> | Interventions for each group with sufficient detail to allow replication, including how and when they will be administered                                                                                                                                                                                                                                                     | 8,9,10    |
| Interventions: modifications    | <a href="#">#11b</a> | Criteria for discontinuing or modifying allocated interventions for a given trial participant (eg, drug dose change in response to harms, participant request, or improving / worsening disease)                                                                                                                                                                               | 8         |
| Interventions: adherence        | <a href="#">#11c</a> | Strategies to improve adherence to intervention protocols, and any procedures for monitoring adherence (eg, drug tablet return; laboratory tests)                                                                                                                                                                                                                              | n/a       |
| Interventions: concomitant care | <a href="#">#11d</a> | Relevant concomitant care and interventions that are permitted or prohibited during the trial                                                                                                                                                                                                                                                                                  | n/a       |
| Outcomes                        | <a href="#">#12</a>  | Primary, secondary, and other outcomes, including the specific measurement variable (eg, systolic blood pressure), analysis metric (eg, change from baseline, final value, time to event), method of aggregation (eg, median, proportion), and time point for each outcome. Explanation of the clinical relevance of chosen efficacy and harm outcomes is strongly recommended | 9,10      |
| Participant timeline            | <a href="#">#13</a>  | Time schedule of enrolment, interventions (including any run-ins and washouts),                                                                                                                                                                                                                                                                                                | 8,9,10    |

assessments, and visits for participants. A schematic diagram is highly recommended (see Figure)

1  
2  
3  
4  
5 Sample size [#14](#) Estimated number of participants needed to 12,13  
6 achieve study objectives and how it was  
7 determined, including clinical and statistical  
8 assumptions supporting any sample size  
9 calculations

10  
11  
12  
13 Recruitment [#15](#) Strategies for achieving adequate participant n/a  
14 enrolment to reach target sample size

15  
16  
17 **Methods:**  
18 **Assignment of**  
19 **interventions (for**  
20 **controlled trials)**  
21  
22  
23

24 Allocation: [#16a](#) Method of generating the allocation sequence n/a  
25 sequence (eg, computer-generated random numbers),  
26 generation and list of any factors for stratification. To  
27 reduce predictability of a random sequence,  
28 details of any planned restriction (eg, blocking)  
29 should be provided in a separate document  
30 that is unavailable to those who enrol  
31 participants or assign interventions  
32  
33  
34  
35  
36

37 Allocation [#16b](#) Mechanism of implementing the allocation n/a  
38 concealment sequence (eg, central telephone; sequentially  
39 mechanism numbered, opaque, sealed envelopes),  
40 describing any steps to conceal the sequence  
41 until interventions are assigned  
42  
43  
44

45 Allocation: [#16c](#) Who will generate the allocation sequence, n/a  
46 implementation who will enrol participants, and who will assign  
47 participants to interventions  
48  
49

50 Blinding (masking) [#17a](#) Who will be blinded after assignment to n/a  
51 interventions (eg, trial participants, care  
52 providers, outcome assessors, data analysts),  
53 and how  
54  
55  
56  
57  
58  
59  
60



|    |                        |                      |                                                    |        |
|----|------------------------|----------------------|----------------------------------------------------|--------|
| 1  | Blinding (masking):    | <a href="#">#17b</a> | If blinded, circumstances under which              | n/a    |
| 2  | emergency              |                      | unblinding is permissible, and procedure for       |        |
| 3  | unblinding             |                      | revealing a participant's allocated intervention   |        |
| 4  |                        |                      | during the trial                                   |        |
| 5  |                        |                      |                                                    |        |
| 6  |                        |                      |                                                    |        |
| 7  |                        |                      |                                                    |        |
| 8  | <b>Methods: Data</b>   |                      |                                                    |        |
| 9  | <b>collection,</b>     |                      |                                                    |        |
| 10 | <b>management, and</b> |                      |                                                    |        |
| 11 | <b>analysis</b>        |                      |                                                    |        |
| 12 |                        |                      |                                                    |        |
| 13 |                        |                      |                                                    |        |
| 14 | Data collection plan   | <a href="#">#18a</a> | Plans for assessment and collection of             | 12,13  |
| 15 |                        |                      | outcome, baseline, and other trial data,           |        |
| 16 |                        |                      | including any related processes to promote         |        |
| 17 |                        |                      | data quality (eg, duplicate measurements,          |        |
| 18 |                        |                      | training of assessors) and a description of        |        |
| 19 |                        |                      | study instruments (eg, questionnaires,             |        |
| 20 |                        |                      | laboratory tests) along with their reliability and |        |
| 21 |                        |                      | validity, if known. Reference to where data        |        |
| 22 |                        |                      | collection forms can be found, if not in the       |        |
| 23 |                        |                      | protocol                                           |        |
| 24 |                        |                      |                                                    |        |
| 25 |                        |                      |                                                    |        |
| 26 |                        |                      |                                                    |        |
| 27 |                        |                      |                                                    |        |
| 28 |                        |                      |                                                    |        |
| 29 |                        |                      |                                                    |        |
| 30 | Data collection plan:  | <a href="#">#18b</a> | Plans to promote participant retention and         | n/a    |
| 31 | retention              |                      | complete follow-up, including list of any          |        |
| 32 |                        |                      | outcome data to be collected for participants      |        |
| 33 |                        |                      | who discontinue or deviate from intervention       |        |
| 34 |                        |                      | protocols                                          |        |
| 35 |                        |                      |                                                    |        |
| 36 |                        |                      |                                                    |        |
| 37 |                        |                      |                                                    |        |
| 38 |                        |                      |                                                    |        |
| 39 | Data management        | <a href="#">#19</a>  | Plans for data entry, coding, security, and        | supp 3 |
| 40 |                        |                      | storage, including any related processes to        |        |
| 41 |                        |                      | promote data quality (eg, double data entry;       |        |
| 42 |                        |                      | range checks for data values). Reference to        |        |
| 43 |                        |                      | where details of data management procedures        |        |
| 44 |                        |                      | can be found, if not in the protocol               |        |
| 45 |                        |                      |                                                    |        |
| 46 |                        |                      |                                                    |        |
| 47 |                        |                      |                                                    |        |
| 48 | Statistics: outcomes   | <a href="#">#20a</a> | Statistical methods for analysing primary and      | 13,14  |
| 49 |                        |                      | secondary outcomes. Reference to where             |        |
| 50 |                        |                      | other details of the statistical analysis plan can |        |
| 51 |                        |                      | be found, if not in the protocol                   |        |
| 52 |                        |                      |                                                    |        |
| 53 |                        |                      |                                                    |        |
| 54 |                        |                      |                                                    |        |
| 55 | Statistics: additional | <a href="#">#20b</a> | Methods for any additional analyses (eg,           | 13,14  |
| 56 | analyses               |                      | subgroup and adjusted analyses)                    |        |
| 57 |                        |                      |                                                    |        |
| 58 |                        |                      |                                                    |        |
| 59 |                        |                      |                                                    |        |
| 60 |                        |                      |                                                    |        |

|    |                      |                      |                                                     |        |
|----|----------------------|----------------------|-----------------------------------------------------|--------|
| 1  | Statistics: analysis | <a href="#">#20c</a> | Definition of analysis population relating to       | n/a    |
| 2  | population and       |                      | protocol non-adherence (eg, as randomised           |        |
| 3  | missing data         |                      | analysis), and any statistical methods to           |        |
| 4  |                      |                      | handle missing data (eg, multiple imputation)       |        |
| 5  |                      |                      |                                                     |        |
| 6  |                      |                      |                                                     |        |
| 7  |                      |                      |                                                     |        |
| 8  | <b>Methods:</b>      |                      |                                                     |        |
| 9  | <b>Monitoring</b>    |                      |                                                     |        |
| 10 |                      |                      |                                                     |        |
| 11 | Data monitoring:     | <a href="#">#21a</a> | Composition of data monitoring committee            | 14     |
| 12 | formal committee     |                      | (DMC); summary of its role and reporting            |        |
| 13 |                      |                      | structure; statement of whether it is               |        |
| 14 |                      |                      | independent from the sponsor and competing          |        |
| 15 |                      |                      | interests; and reference to where further           |        |
| 16 |                      |                      | details about its charter can be found, if not in   |        |
| 17 |                      |                      | the protocol. Alternatively, an explanation of      |        |
| 18 |                      |                      | why a DMC is not needed                             |        |
| 19 |                      |                      |                                                     |        |
| 20 |                      |                      |                                                     |        |
| 21 |                      |                      |                                                     |        |
| 22 |                      |                      |                                                     |        |
| 23 |                      |                      |                                                     |        |
| 24 | Data monitoring:     | <a href="#">#21b</a> | Description of any interim analyses and             | supp 7 |
| 25 | interim analysis     |                      | stopping guidelines, including who will have        |        |
| 26 |                      |                      | access to these interim results and make the        |        |
| 27 |                      |                      | final decision to terminate the trial               |        |
| 28 |                      |                      |                                                     |        |
| 29 |                      |                      |                                                     |        |
| 30 |                      |                      |                                                     |        |
| 31 | Harms                | <a href="#">#22</a>  | Plans for collecting, assessing, reporting, and     | 14     |
| 32 |                      |                      | managing solicited and spontaneously                |        |
| 33 |                      |                      | reported adverse events and other unintended        |        |
| 34 |                      |                      | effects of trial interventions or trial conduct     |        |
| 35 |                      |                      |                                                     |        |
| 36 |                      |                      |                                                     |        |
| 37 |                      |                      |                                                     |        |
| 38 | Auditing             | <a href="#">#23</a>  | Frequency and procedures for auditing trial         | supp 4 |
| 39 |                      |                      | conduct, if any, and whether the process will       |        |
| 40 |                      |                      | be independent from investigators and the           |        |
| 41 |                      |                      | sponsor                                             |        |
| 42 |                      |                      |                                                     |        |
| 43 |                      |                      |                                                     |        |
| 44 |                      |                      |                                                     |        |
| 45 | <b>Ethics and</b>    |                      |                                                     |        |
| 46 | <b>dissemination</b> |                      |                                                     |        |
| 47 |                      |                      |                                                     |        |
| 48 |                      |                      |                                                     |        |
| 49 | Research ethics      | <a href="#">#24</a>  | Plans for seeking research ethics committee /       | 14     |
| 50 | approval             |                      | institutional review board (REC / IRB) approval     |        |
| 51 |                      |                      |                                                     |        |
| 52 |                      |                      |                                                     |        |
| 53 | Protocol             | <a href="#">#25</a>  | Plans for communicating important protocol          | supp 5 |
| 54 | amendments           |                      | modifications (eg, changes to eligibility criteria, |        |
| 55 |                      |                      | outcomes, analyses) to relevant parties (eg,        |        |
| 56 |                      |                      | investigators, REC / IRBs, trial participants,      |        |
| 57 |                      |                      | trial registries, journals, regulators)             |        |
| 58 |                      |                      |                                                     |        |
| 59 |                      |                      |                                                     |        |
| 60 |                      |                      |                                                     |        |

|    |                       |                      |                                                                                                                                                                                                                                                                                     |        |
|----|-----------------------|----------------------|-------------------------------------------------------------------------------------------------------------------------------------------------------------------------------------------------------------------------------------------------------------------------------------|--------|
| 1  | Consent or assent     | <a href="#">#26a</a> | Who will obtain informed consent or assent from potential trial participants or authorised surrogates, and how (see Item 32)                                                                                                                                                        | 14     |
| 2  |                       |                      |                                                                                                                                                                                                                                                                                     |        |
| 3  |                       |                      |                                                                                                                                                                                                                                                                                     |        |
| 4  |                       |                      |                                                                                                                                                                                                                                                                                     |        |
| 5  |                       |                      |                                                                                                                                                                                                                                                                                     |        |
| 6  | Consent or assent:    | <a href="#">#26b</a> | Additional consent provisions for collection and use of participant data and biological specimens in ancillary studies, if applicable                                                                                                                                               | n/a    |
| 7  | ancillary studies     |                      |                                                                                                                                                                                                                                                                                     |        |
| 8  |                       |                      |                                                                                                                                                                                                                                                                                     |        |
| 9  |                       |                      |                                                                                                                                                                                                                                                                                     |        |
| 10 |                       |                      |                                                                                                                                                                                                                                                                                     |        |
| 11 | Confidentiality       | <a href="#">#27</a>  | How personal information about potential and enrolled participants will be collected, shared, and maintained in order to protect confidentiality before, during, and after the trial                                                                                                | supp 3 |
| 12 |                       |                      |                                                                                                                                                                                                                                                                                     |        |
| 13 |                       |                      |                                                                                                                                                                                                                                                                                     |        |
| 14 |                       |                      |                                                                                                                                                                                                                                                                                     |        |
| 15 |                       |                      |                                                                                                                                                                                                                                                                                     |        |
| 16 |                       |                      |                                                                                                                                                                                                                                                                                     |        |
| 17 |                       |                      |                                                                                                                                                                                                                                                                                     |        |
| 18 | Declaration of        | <a href="#">#28</a>  | Financial and other competing interests for principal investigators for the overall trial and each study site                                                                                                                                                                       | 16     |
| 19 | interests             |                      |                                                                                                                                                                                                                                                                                     |        |
| 20 |                       |                      |                                                                                                                                                                                                                                                                                     |        |
| 21 |                       |                      |                                                                                                                                                                                                                                                                                     |        |
| 22 |                       |                      |                                                                                                                                                                                                                                                                                     |        |
| 23 |                       |                      |                                                                                                                                                                                                                                                                                     |        |
| 24 | Data access           | <a href="#">#29</a>  | Statement of who will have access to the final trial dataset, and disclosure of contractual agreements that limit such access for investigators                                                                                                                                     | supp 7 |
| 25 |                       |                      |                                                                                                                                                                                                                                                                                     |        |
| 26 |                       |                      |                                                                                                                                                                                                                                                                                     |        |
| 27 |                       |                      |                                                                                                                                                                                                                                                                                     |        |
| 28 |                       |                      |                                                                                                                                                                                                                                                                                     |        |
| 29 |                       |                      |                                                                                                                                                                                                                                                                                     |        |
| 30 | Ancillary and post    | <a href="#">#30</a>  | Provisions, if any, for ancillary and post-trial care, and for compensation to those who suffer harm from trial participation                                                                                                                                                       | supp 6 |
| 31 | trial care            |                      |                                                                                                                                                                                                                                                                                     |        |
| 32 |                       |                      |                                                                                                                                                                                                                                                                                     |        |
| 33 |                       |                      |                                                                                                                                                                                                                                                                                     |        |
| 34 |                       |                      |                                                                                                                                                                                                                                                                                     |        |
| 35 |                       |                      |                                                                                                                                                                                                                                                                                     |        |
| 36 | Dissemination         | <a href="#">#31a</a> | Plans for investigators and sponsor to communicate trial results to participants, healthcare professionals, the public, and other relevant groups (eg, via publication, reporting in results databases, or other data sharing arrangements), including any publication restrictions | 14,15  |
| 37 | policy: trial results |                      |                                                                                                                                                                                                                                                                                     |        |
| 38 |                       |                      |                                                                                                                                                                                                                                                                                     |        |
| 39 |                       |                      |                                                                                                                                                                                                                                                                                     |        |
| 40 |                       |                      |                                                                                                                                                                                                                                                                                     |        |
| 41 |                       |                      |                                                                                                                                                                                                                                                                                     |        |
| 42 |                       |                      |                                                                                                                                                                                                                                                                                     |        |
| 43 |                       |                      |                                                                                                                                                                                                                                                                                     |        |
| 44 |                       |                      |                                                                                                                                                                                                                                                                                     |        |
| 45 |                       |                      |                                                                                                                                                                                                                                                                                     |        |
| 46 |                       |                      |                                                                                                                                                                                                                                                                                     |        |
| 47 | Dissemination         | <a href="#">#31b</a> | Authorship eligibility guidelines and any intended use of professional writers                                                                                                                                                                                                      | n/a    |
| 48 | policy: authorship    |                      |                                                                                                                                                                                                                                                                                     |        |
| 49 |                       |                      |                                                                                                                                                                                                                                                                                     |        |
| 50 |                       |                      |                                                                                                                                                                                                                                                                                     |        |
| 51 | Dissemination         | <a href="#">#31c</a> | Plans, if any, for granting public access to the full protocol, participant-level dataset, and statistical code                                                                                                                                                                     | n/a    |
| 52 | policy: reproducible  |                      |                                                                                                                                                                                                                                                                                     |        |
| 53 | research              |                      |                                                                                                                                                                                                                                                                                     |        |
| 54 |                       |                      |                                                                                                                                                                                                                                                                                     |        |
| 55 |                       |                      |                                                                                                                                                                                                                                                                                     |        |

## Appendices

|    |                  |                     |                                                  |        |
|----|------------------|---------------------|--------------------------------------------------|--------|
| 1  | Informed consent | <a href="#">#32</a> | Model consent form and other related             | supp 8 |
| 2  | materials        |                     | documentation given to participants and          |        |
| 3  |                  |                     | authorised surrogates                            |        |
| 4  |                  |                     |                                                  |        |
| 5  |                  |                     |                                                  |        |
| 6  | Biological       | <a href="#">#33</a> | Plans for collection, laboratory evaluation, and | n/a    |
| 7  | specimens        |                     | storage of biological specimens for genetic or   |        |
| 8  |                  |                     | molecular analysis in the current trial and for  |        |
| 9  |                  |                     | future use in ancillary studies, if applicable   |        |
| 10 |                  |                     |                                                  |        |
| 11 |                  |                     |                                                  |        |
| 12 |                  |                     |                                                  |        |

13 Notes:

- 14
- 15 • 2b: [www.trialregister.nl](http://www.trialregister.nl): NL7212 The SPIRIT checklist is distributed under the terms of the
  - 16 Creative Commons Attribution License CC-BY-ND 3.0. This checklist was completed on 25.
  - 17 January 2021 using <https://www.goodreports.org/>, a tool made by the [EQUATOR Network](#) in
  - 18 collaboration with [Penelope.ai](#)
  - 19
  - 20
  - 21
  - 22
  - 23
  - 24
  - 25
  - 26
  - 27
  - 28
  - 29
  - 30
  - 31
  - 32
  - 33
  - 34
  - 35
  - 36
  - 37
  - 38
  - 39
  - 40
  - 41
  - 42
  - 43
  - 44
  - 45
  - 46
  - 47
  - 48
  - 49
  - 50
  - 51
  - 52
  - 53
  - 54
  - 55
  - 56
  - 57
  - 58
  - 59
  - 60
