# Supplementary material for: Is pharmacokinetic-guided dosing of desmopressin and von Willebrand factor-containing concentrates in individuals with von Willebrand disease or low von Willebrand factor reliable and feasible? A protocol for a multicentre, non-randomised, open label cohort trial, the OPTI-CLOT: to WiN study
Source: PubMed Central journal article supplement — BMJ Open. 2022 Feb 15;12(2):e049493. doi: 10.1136/bmjopen-2021-049493 (PMC8852670; doi:10.1136/bmjopen-2021-049493), 2022-02-15
Supplement: bmjopen-2021-049493supp001.pdf [file bmjopen-2021-049493supp001.pdf]

**Supplementary data**

1. Steering committee
2. List of participating centers and principal investigators
3. Monitoring and safety assurance
4. Handling and storage of data and documents
5. Amendments
6. Compensation for injury
7. Access to final trial dataset
8. Model for patient information and informed consent form (Dutch only).

## 1. Steering committee

### Coordinating investigator / project leader:

Dr. M.H. Cnossen, Pediatric Hematologist

Department of Pediatric Hematology, Erasmus MC – Sophia Children’s Hospital, University Medical Center Rotterdam, Rotterdam, the Netherlands

Email: [m.cnossen@erasmusmc.nl](mailto:m.cnossen@erasmusmc.nl)

### Co-project leader:

Prof. Dr. R.A.A. Mathôt, Hospital Pharmacist – Clinical Pharmacologist

Hospital Pharmacy – Clinical Pharmacology, Amsterdam UMC, University of Amsterdam, Amsterdam, the Netherlands

[r.mathot@amsterdamumc.nl](mailto:r.mathot@amsterdamumc.nl)

### Principal investigators:

See 2. List of participating centers and principal investigators

### Sponsor:

Prof. Dr. E.H.H.M. Rings, Head of Department of Pediatrics,

Erasmus MC- Sophia Children’s Hospital, University Medical Center Rotterdam, Rotterdam, the Netherlands

[e.rings@erasmusmc.nl](mailto:e.rings@erasmusmc.nl)

## 2. List of Participating Centers

Erasmus MC, University Medical Center Rotterdam, Rotterdam, the Netherlands

PI: Dr. M.H. Cnossen ([m.cnossen@erasmusmc.nl](mailto:m.cnossen@erasmusmc.nl))

Radboud University Medical Center, Nijmegen, the Netherlands

PI: Dr. S.E.M. Schols ([saskia.schols@radboudumc.nl](mailto:saskia.schols@radboudumc.nl))

University Medical Center Groningen, Groningen, the Netherlands

PI: Prof. Dr. K. Meijer ([k.meijer@umcg.nl](mailto:k.meijer@umcg.nl))

Amsterdam University Medical Center, Amsterdam, the Netherlands

PI: Prof. Dr. C.J. Fijnvandraat ([c.j.fijnvandraat@erasmusmc.nl](mailto:c.j.fijnvandraat@erasmusmc.nl))

Maastricht University Medical Center, Maastricht, the Netherlands

PI: Drs. F. Heubel-Moenen ([floor.moenen@mumc.nl](mailto:floor.moenen@mumc.nl))

Haga Hospital, The Hague, the Netherlands

PI: Dr. P. Ypma ([p.ypma@hagaziekenhuis.nl](mailto:p.ypma@hagaziekenhuis.nl))

Maxima Medical Center, Veldhoven, the Netherlands

PI: Dr. L. van Nieuwenhuizen ([laurens.nieuwenhuizen@mmc.nl](mailto:laurens.nieuwenhuizen@mmc.nl))

### **3. Handling and storage of data and documents**

All data will be handled confidentially and will be filed in a coded database. A study number will be appointed to every patient. Individual patients can only be identified by participating investigators at the different sites by this number in combination with their hospital registration number. Handling of data will be done according to the Dutch Personal Data Protection Act. Blood samples will be handled confidentially and will be stored in the hemostasis laboratory in the Erasmus MC. Within a few weeks after discharge of a patient, a member of the study team will make an appointment to collect the blood samples. The samples will be stored for 15 years (and returned to the site, if demanded so by specific site-regulations).

#### **4. Monitoring and quality assurance**

The risk for participating patients is minimal. Daily monitoring of plasma levels and subsequent adjustment of VWF-containing concentrate dosing according to the Dutch Hemophilia Consensus target levels, will ensure adequate FVIII and VWF levels to prevent bleeding. By following the Consensus, this therapeutic study poses no additional risk to the patients. Safety and quality of the study will be monitored once yearly at every participating site by an auditor independent from the sponsor and investigators.

## 5. Amendments

Amendments are changes made to the research after a favourable opinion by the accredited METC has been given. All amendments will be notified to the METC that gave a favourable opinion.

A 'substantial amendment' is defined as an amendment to the terms of the METC application, or to the protocol or any other supporting documentation, that is likely to affect to a significant degree:

- the safety or physical or mental integrity of the subjects of the trial;
- the scientific value of the trial;
- the conduct or management of the trial; or
- the quality or safety of any intervention used in the trial.

All substantial amendments will be notified to the METC and to the competent authority.

Non-substantial amendments will not be notified to the accredited METC and the competent authority, but will be recorded and filed by the sponsor.

All amendments will be communicated to all participating centers by the trial coordinator. Changes regarding inclusion and exclusion criteria or study design, will also be communicated to [www.trialregister.nl](http://www.trialregister.nl) (NL7212).

## 6. Compensation for injury

The sponsor/investigator has a liability insurance which is in accordance with article 7, subsection 9 of the WMO. The sponsor/investigator has a liability insurance which is in accordance with article 7 of the WMO. The sponsor (also) has an insurance which is in accordance with the legal requirements in the Netherlands (Article 7 WMO). This insurance provides cover for damage to research subjects through injury or death caused by the study. The insurance applies to the damage that becomes apparent during the study or within 4 years after the end of the study.

## **7. Access to final trial dataset**

The sponsor of the OPTI-CLOT: To WiN study will have access to the final dataset and will be the owner of all study data. However, all participating centers have access to their own data and will have permission to use these data for non-commercial research within their own center and to improve patient care. All publications regarding the OPTI-CLOT: To WiN study will be coordinated by the project leader. Other centers than the sponsor site may only publish data after permission from the sponsor and if the sponsor is not publishing the data within a fair amount of time after the study and data analysis has ended. All participating centers have contractual agreements with the sponsor regarding these matters.



## 8. Model for patient information and informed consent form.

# Proefpersoneninformatie voor deelname aan medisch-wetenschappelijk onderzoek

## Onderzoek naar de effecten van farmacokinetische modellen bij het doseren DDAVP en/of stollingsfactorconcentraten bij patiënten met de ziekte van von Willebrand bij medische interventies

Officiële titel: Implementatie van farmacokinetisch gestuurd doseren van DDAVP en VWF-bevattende stollingsfactorconcentraten bij von Willebrandziekte ("OPTI-CLOT: To-WiN")

### **Informatie voor een patiënt met de ziekte van von Willebrand (≥16 jaar)**

Geachte heer/mevrouw,

Wij vragen u om mee te doen aan een medisch-wetenschappelijk onderzoek.

Meedoen is vrijwillig. Om mee te doen is wel uw schriftelijke toestemming nodig. U ontvangt deze brief omdat u de ziekte van Von Willebrand heeft en u binnenkort een ingreep ondergaat.

Voordat u beslist of u wilt meedoen aan dit onderzoek, krijgt u uitleg over wat het onderzoek inhoudt. Lees deze informatie rustig door en vraag de onderzoeker uitleg als u vragen heeft. U kunt ook de onafhankelijk deskundige, die aan het eind van deze brief genoemd wordt, om aanvullende informatie vragen. U kunt er ook over praten met uw partner, vrienden of familie.

Verdere informatie over meedoen aan zo'n onderzoek staat op de website van de Rijksoverheid:

[www.rijksoverheid.nl/mensenonderzoek](http://www.rijksoverheid.nl/mensenonderzoek).

### **Algemene informatie**

Dit onderzoek is opgezet door het Erasmus MC en wordt gedaan door artsen in verschillende ziekenhuizen in Nederland. Er zullen naar verwachting 120 proefpersonen meedoen; zowel volwassenen als kinderen van alle leeftijden. De medisch-ethische toetsingscommissie heeft dit onderzoek goedgekeurd. Algemene informatie over de toetsing van onderzoek vindt u op de website van de Rijksoverheid: [www.rijksoverheid.nl/mensenonderzoek](http://www.rijksoverheid.nl/mensenonderzoek).

### **1. Doel van het onderzoek**

Het doel van dit onderzoek is uitzoeken of een nieuwe manier van doseren (doseren op basis van farmacokinetische modellen, ook wel PK-modellen genoemd) van DDAVP en/of stollingsfactorconcentraat toepasbaar is in de praktijk. Deze PK-modellen zullen daarom onderzocht worden in verschillende situaties: tijdens DDAVP-testen, bij de behandeling van bloedingen, en bij de

behandeling rondom medische ingrepen (zoals operatie, tandheelkundig ingreep, kijkonderzoek van darm en bevalling in het ziekenhuis).

## 2. Achtergrond van het onderzoek

Patiënten met de ziekte van Von Willebrand worden rondom medische ingrepen behandeld met DDAVP en/of een stollingsfactorconcentraat. Deze medicatie wordt tot nu toe op grond van het lichaamsgewicht gedoseerd. Echter, de medicatie gedraagt zich bij elke persoon verschillend. Dit wordt grotendeels bepaald door hoe het lichaam met het medicijn omgaat. Dit wordt “farmacokinetiek” (PK) genoemd. Op basis van gegevens van patiënten die eerder met deze medicatie zijn behandeld, zijn PK-modellen gemaakt. Met deze modellen is het mogelijk geworden om een beter inzicht te krijgen in hoe het lichaam van verschillende patiënten met het medicijn om zal gaan. In de toekomst kunnen wij hiermee per persoon voorspellen hoe vaak en in welke dosering de medicatie gegeven moet worden. Hiermee voorkomen we dat we óf te weinig, óf te veel medicatie geven.

## 3. Wat meedoen inhoudt

Als u meedoet, duurt dat totaal enkele dagen tot weken voor u, afhankelijk van het soort behandeling.

### Behandeling

Rondom de ingreep die u zult ondergaan, wordt u behandeld met DDAVP en/of stollingsfactorconcentraat. De keuze voor het soort medicatie wordt bepaald door uw behandelend arts (hematoloog) en is hetzelfde als wanneer u niet zou meedoen aan het onderzoek. Als u meedoet aan het onderzoek zal op een andere, specifiekere manier bepaald worden hoeveel van het medicijn u krijgt en hoe vaak. In dit onderzoek zal dit worden berekend op basis van uw persoonlijke gegevens en uw persoonlijke PK-profiel, gecombineerd met het algemene PK-model. Dit verschilt van de normale situatie, waarin de dosis op basis van uw lichaamsgewicht wordt bepaald.

Omdat de ingreep die u zult ondergaan pas over enige tijd zal plaatsvinden, geeft dit gelegenheid om bij u van tevoren een persoonlijk PK-profiel op te stellen. Hierbij worden als u behandeld wordt met DDAVP, indien mogelijk, de gegevens van een eerdere DDAVP-test gebruikt. U hoeft dan niet extra naar het ziekenhuis te komen. In de andere gevallen (als u geen bruikbare DDAVP test heeft en behandeling met DDAVP moet ondergaan, of als u een behandeling met stollingsfactorconcentraat gaat krijgen) willen wij graag een testdosis van de medicatie toedienen en op meerdere momenten bloed bij u afnemen om het persoonlijke PK-profiel te maken.

### Bezoeken en metingen

Naast de gebruikelijke handelingen die worden gedaan ter voorkoming van een bloeding rondom de ingreep, zult u in het kader van het onderzoek eenmalig gewogen worden, en er wordt een “lean body mass” meting gedaan (meting van de vetvrije massa van het lichaam).

Er wordt extra bloed afgenomen om de hoeveelheid stollingsfactoren in uw bloed te bepalen en mogelijk krijgt u een testdosis DDAVP en/of stollingsfactorconcentraat toegediend. Het kan zijn dat u hiervoor extra naar het ziekenhuis moet komen.

Voor een schematisch overzicht van de onderzoekshandelingen, zie **bijlage C**: overzicht onderzoekshandelingen.

#### 4. Wat wordt er van u verwacht

Om het onderzoek goed te laten verlopen, is het belangrijk dat u zich aan de volgende afspraken houdt.

De afspraken zijn dat u:

- niet ook nog aan een ander medisch-wetenschappelijk onderzoek meedoet.
- afspraken voor bezoeken nakomt.

Het is belangrijk dat u contact opneemt met de onderzoeker:

- voordat u andere geneesmiddelen gaat gebruiken. Ook als dat homeopathische geneesmiddelen, natuurgeneesmiddelen, vitaminen en/of geneesmiddelen van de drogist zijn.
- als u in een ziekenhuis wordt opgenomen of behandeld.
- u plotseling gezondheidsklachten krijgt.
- u een bloeding krijgt na de ingreep.
- u niet meer wilt meedoen aan het onderzoek.
- als uw contactgegevens wijzigen.

#### Zwangerschap

Bent u zwanger, of wordt u zwanger tijdens het onderzoek? Laat dit dan direct weten aan uw behandeld arts. Hij/zij zal dan beslissen of uw behandeling moet worden aangepast.

#### 5. Mogelijke bijwerkingen/complicaties en ongemakken

Het geneesmiddel dat u tijdens het onderzoek krijgt, is hetzelfde middel als dat u krijgt als u niet meedoet aan het onderzoek. Er zijn daarom geen andere bijwerkingen te verwachten dan tijdens de standaard behandeling rondom een ingreep.

#### Metingen

Bij de eenmalige "lean body mass" meting ligt u op de onderzoeksbank, waarna er een sticker met elektrode op uw hand en voet geplakt wordt. Op deze elektroden wordt een apparaatje aangesloten, waarop de onderzoeker de gegevens over uw lichaamssamenstelling kan aflezen. Dit onderzoek is niet pijnlijk.

Bloedafnames kunnen pijn doen of een bloeduitstorting geven. Alles bij elkaar nemen we, afhankelijk van welk geneesmiddel u krijgt, tussen de 60 en 80 ml extra bloed bij u af. Deze hoeveelheid geeft geen problemen. Ter vergelijking: bij de bloedbank wordt 500 ml per keer afgenomen.

## 6. Mogelijke voor- en nadelen

Het is belangrijk dat u de mogelijk voor- en nadelen goed afweegt voordat u besluit mee te doen.

U heeft zelf geen direct voordeel van dit onderzoek. Voor de toekomst kan het onderzoek wel nuttige gegevens opleveren. Mogelijk krijgt u door mee te doen aan het onderzoek een dosering van het geneesmiddel die beter bij uw lichaam past, waardoor wordt voorkomen dat er te veel of te weinig wordt gegeven rondom een ingreep. Dit kan een voordeel opleveren. Zoals gebruikelijk worden de waarden van de stollingsfactoren in uw bloed nauwkeurig gecontroleerd, waardoor u geen gevaar loopt en de behandelaar steeds op de hoogte is of u voldoende van het geneesmiddel krijgt toegediend om bloedingen te voorkomen. Wanneer wij besluiten om bij elke patiënt in de toekomst een farmacokinetisch model te maken voor de ingreep, kunnen we de in dit onderzoek verzamelde gegevens mogelijk in de toekomst voor uw behandeling gebruiken en hoeft u dan niet extra te worden geprikt. Dit kan ook een voordeel zijn.

Nadelen van meedoen aan het onderzoek kunnen zijn:

- mogelijke ongemakken van de metingen in het onderzoek (zie punt 5)

Deelname aan het onderzoek betekent ook:

- dat u extra tijd kwijt bent;
- extra bloedafnames;
- dat u mogelijk meerdere keren extra naar het ziekenhuis moet komen;
- dat u afspraken heeft waaraan u zich moet houden

Al deze zaken zijn hiervoor onder punt 3, 4 en 5 beschreven.

## 7. Als u niet wilt meedoen of wilt stoppen met het onderzoek

U beslist zelf of u meedoet aan het onderzoek. Deelname is vrijwillig. Als u niet wilt meedoen, wordt u rondom de ingreep op de gebruikelijke manier behandeld voor uw von Willebrandziekte, en de geneesmiddelen zullen op de gebruikelijke manier gedoseerd worden. De onderzoeker kan u meer vertellen over de behandelingsmogelijkheden die er zijn en de voor- en nadelen daarvan.

Als u wel meedoet, kunt u zich altijd bedenken en toch stoppen, ook tijdens het onderzoek. U wordt dan weer op de gebruikelijke manier behandeld voor uw von Willebrandziekte. U hoeft niet te zeggen waarom u stopt. Wel moet u dit direct melden aan de onderzoeker. De gegevens die tot dat moment zijn verzameld, worden gebruikt voor onderzoek. Als u wilt, kan verzameld lichaamsmateriaal worden vernietigd.

Als er nieuwe informatie over het onderzoek is die belangrijk voor u is, laat de behandelend arts dit aan u weten. U wordt dan gevraagd of uw blijft meedoen.

## 8. Einde van het onderzoek

Uw deelname aan het onderzoek stopt als

- alle bezoeken en bloedafnames volgens het schema voorbij zijn
- u zelf kiest om te stoppen
- de onderzoeker het beter voor u vindt om te stoppen
- de overheid of de beoordelende medisch-ethische toetsingscommissie besluit om het onderzoek te stoppen

Het hele onderzoek is afgelopen als alle deelnemers klaar zijn. Na het verwerken van alle gegevens informeert de onderzoeker u over de belangrijkste uitkomsten van het onderzoek.

## 9. Gebruik en bewaren van uw gegevens en lichaamsmateriaal

Voor dit onderzoek worden uw persoonsgegevens en lichaamsmateriaal verzameld, gebruikt en bewaard. Het gaat om gegevens zoals naam, adres, geboortedatum en om gegevens over uw gezondheid. Het gaat bij dit onderzoek om uitslagen van bloed. Gebruik en bewaring van uw gegevens en lichaamsmateriaal is nodig om de wetenschappelijke vraagstelling van dit onderzoek te kunnen beantwoorden en over de resultaten te publiceren. U wordt gevraagd om hiervoor toestemming te geven. Als u dat niet wilt, kunt u niet deelnemen aan dit onderzoek.

### Vertrouwelijkheid van uw gegevens en lichaamsmateriaal

Om uw privacy te beschermen, worden uw gegevens en het lichaamsmateriaal voorzien van een code. De naam en andere gegevens die u direct kunnen identificeren worden apart bewaard. Alleen met de sleutel van de code zijn gegevens tot u te herleiden. De sleutel van de code blijft bij de onderzoeker. Naar de sponsor/opdrachtgever en andere bij het onderzoek betrokken partijen worden uw gegevens en lichaamsmateriaal alleen onder die code verstuurd. Ook in rapporten en publicaties over het onderzoek worden alleen de gecodeerde gegevens van u vermeld.

### Controle en inzage in uw gegevens

Sommige personen en instanties moeten inzage kunnen hebben in al uw gegevens. Ook in de gegevens zonder code. Dit is nodig om te kunnen controleren of het onderzoek goed en betrouwbaar is uitgevoerd. Personen en instanties die ter controle toegang krijgen tot uw gegevens: medewerkers van het onderzoeksteam, de veiligheidscommissie die het onderzoek in de gaten houdt, een controleur die door de opdrachtgever van het onderzoek is ingehuurd, nationale en internationale toezichthoudende autoriteiten, bijvoorbeeld de Inspectie Gezondheidszorg en Jeugd.

Zij zullen uw gegevens geheim houden. U wordt gevraagd voor deze inzage toestemming te geven. Indien u dat niet wilt, kunt u niet deelnemen aan dit onderzoek.

**Bewaartermijn gegevens en lichaamsmateriaal**

Op de onderzoekslocatie (het ziekenhuis) en bij de opdrachtgever worden uw gegevens gedurende de wettelijk voorgeschreven termijn bewaard, de wettelijk voorgeschreven termijn is 15 jaar.

Het van u verkregen lichaamsmateriaal wordt niet onmiddellijk na analyse vernietigd. Uw lichaamsmateriaal wordt bewaard om in de loop van dit onderzoek daarop nog nieuwe analyses/bepalingen te kunnen doen.

**Bewaring en gebruik van gegevens en lichaamsmateriaal voor ander onderzoek**

Na afloop van dit onderzoek kunnen uw gegevens en lichaamsmateriaal nog van belang zijn voor het uitvoeren van ander onderzoek. U wordt gevraagd toestemming te geven voor dit langer bewaren en voor gebruik in ander, toekomstig, onderzoek op het gebied van uw aandoening. Indien u dat niet wilt, kunt u gewoon deelnemen aan het huidige onderzoek.

**Informatie over onverwachte bevindingen**

Tijdens dit onderzoek kan er bij toeval iets gevonden worden dat niet van belang is voor het onderzoek maar wel voor u. Als dit belangrijk is voor uw gezondheid, dan zal je op de hoogte worden gesteld door de onderzoeker. U kunt dan met de behandelend arts bespreken wat er gedaan moet worden. Ook hiervoor geeft u toestemming.

**Intrekken toestemming**

U kunt uw toestemming altijd weer intrekken, voor wat betreft dit onderzoek en voor wat betreft het toekomstig onderzoek. De reeds over u verzamelde gegevens zullen dan nog wel worden gebruikt in het onderzoek. Uw lichaamsmateriaal zal na intrekking van uw toestemming worden vernietigd. Als er al metingen in dat lichaamsmateriaal zijn gedaan, dan worden de resultaten nog wel gebruikt in het onderzoek. Indien u wilt dat al de gegevens over u worden verwijderd, dan kunt u daarom verzoeken.

**Meer informatie over de rechten bij verwerking van gegevens**

Voor meer informatie over de naleving van uw rechten bij de verwerking van uw persoonsgegevens kunt u contact opnemen met de verantwoordelijke voor de verwerking van jouw persoonsgegevens. Voor dit onderzoek is het Erasmus MC is verantwoordelijk voor de naleving van de regels voor de verwerking van uw persoonsgegevens.

Bij vragen of klachten over de verwerking van uw persoonsgegevens raden we u aan eerst contact op te nemen met de onderzoekslocatie. U kunt ook contact opnemen met de Functionaris voor de Gegevensbescherming van de instelling of de Autoriteit Persoonsgegevens. Voor contactgegevens zie bijlage A.

Meer informatie over uw rechten bij de verwerking van uw persoonsgegevens kunt u vinden op de website van de Autoriteit Persoonsgegevens:

(<https://autoriteitpersoonsgegevens.nl/nl/onderwerpen/avg-nieuweeuropese-privacywetgeving/controle-over-je-data>).

### **Registratie van het onderzoek**

Dit onderzoek staat ook in een overzicht van medisch-wetenschappelijke onderzoeken, namelijk op [www.trialregister.nl](http://www.trialregister.nl). Deze website bevat geen informatie die herleidbaar is tot u als persoon. Wel kan de website een samenvatting van de resultaten van dit onderzoek tonen. U vindt dit onderzoek onder "OPTI-CLOT: To WiN".

### **10. Verzekering voor proefpersonen**

Voor iedereen die meedoet aan dit onderzoek is een verzekering afgesloten. De verzekering dekt schade door het onderzoek. Niet alle schade is gedekt. In **bijlage B** vindt u meer informatie over de verzekering. Daar staat ook aan wie u schade kunt melden.

### **11. Vergoeding voor meedoen**

De extra testen en ziekenhuisbezoeken voor het onderzoek kosten u niets. U wordt niet betaald voor het meedoen aan dit onderzoek. Wel krijgt u een vergoeding voor de reis- en parkeerkosten als u naar het ziekenhuis komt voor het maken van een PK-profiel.

### **12. Heeft u vragen?**

Bij vragen kunt u contact opnemen met de onderzoeker of uw behandeld arts. Voor onafhankelijk advies over meedoen aan dit onderzoek kunt u terecht bij de onafhankelijke arts. Hij weet veel over het onderzoek, maar heeft niet te maken met dit onderzoek.

Bij klachten kunt u het beste terecht bij de klachtenfunctionaris/-commissie van uw ziekenhuis. Alle gegevens vindt u in **bijlage A**: Contactgegevens.

### **13. Ondertekening toestemmingsformulier**

Wanneer u voldoende bedenktijd heeft gehad, wordt u gevraagd te beslissen over deelname aan dit onderzoek. Indien u toestemming geeft, zullen wij u vragen deze op de bijbehorende toestemmingsverklaring schriftelijk te bevestigen. Door uw schriftelijke toestemming geeft u aan dat u de informatie heeft begrepen en instemt met deelname aan het onderzoek. Het handtekeningenblad wordt door de onderzoeker bewaard. U krijgt een kopie of een tweede exemplaar van deze toestemmingsverklaring.

Met vriendelijke groet,

De "OPTI-CLOT: To-WiN" onderzoeksgroep

**14. Bijlagen bij deze informatie**

- A. Contactgegevens
- B. Informatie over de verzekering
- C. Schema onderzoekshandelingen
- D. Toestemmingsformulier



## Bijlage A: contactgegevens

### Contactgegevens Erasmus MC

Bij vragen of opmerkingen kunt u contact opnemen met drs. W. Al Arashi, arts-onderzoeker, via telefoonnummer 06-34861847 (studietelefoon OPTI-CLOT studies).

U kunt ook contact opnemen met de hoofdonderzoeker Dr. M.H. Cnossen, kinderarts-hematoloog, via telefoonnummer 010-7036691.

Of met een van de andere onderzoekers:

Artsen Hematologie: tel. 010-7030148.

Hemofilieverpleegkundigen: tel. 06-12623034.

### Onafhankelijk deskundige

Als u twijfelt over deelname aan dit onderzoek, dan kunt u ook een onafhankelijk arts raadplegen, die zelf niet bij het onderzoek betrokken is, maar wel deskundig is op dit gebied: Prof. dr. H.A.W.M. Tiddens, kinderarts, tel. 010-7036690.

Ook als u vragen voor of tijdens het onderzoek hebt die u liever niet aan de onderzoekers stelt kunt u contact opnemen met de onafhankelijk arts.

### Klachtencommissie

Als u niet tevreden bent over het onderzoek of de behandeling, dan kunt u terecht bij de onafhankelijke klachtencommissie van het ziekenhuis. U kunt zich dan wenden tot:

De secretaris van de klachtencommissie Erasmus MC

Postbus 2040

3000 CA Rotterdam

Tel. 010-7033198

### Functionaris Gegevensbescherming voor het Erasmus MC:

Dhr. P. van Hoogdalem

Bereikbaar via het secretariaat van de Afdeling Juridische Zaken, tel. 010-7034986.

## Bijlage B: informatie over de verzekering

Voor iedereen die meedoet aan dit onderzoek, heeft het Erasmus MC een verzekering afgesloten. De verzekering dekt schade door deelname aan het onderzoek. Dit geldt voor schade tijdens het onderzoek of binnen vier jaar na het einde ervan. Schade moet u binnen die vier jaar aan de verzekeraar hebben gemeld.

De verzekering dekt niet alle schade. Onderaan deze tekst staat in het kort welke schade niet wordt gedekt.

Deze bepalingen staan in het Besluit verplichte verzekering bij medisch-wetenschappelijk onderzoek met mensen. Dit besluit staat op [www.ccmo.nl](http://www.ccmo.nl), de website van de Centrale Commissie Mensgebonden Onderzoek (zie 'Bibliotheek' en dan 'Wet- en regelgeving').

Bij schade kunt u direct contact leggen met de verzekeraar.

De verzekeraar van het onderzoek is:

Naam: CNA Insurance Company Limited

Adres: Strawinskylaan 703, 1077 XX Amsterdam

Telefoonnummer: +31 (0)20 573 72 74

E-mail: [Esther.vanherk@cna Hardy.com](mailto:Esther.vanherk@cna Hardy.com)

(Polisnummer: CT CNA-2015 HCCD0416C)

(Contactpersoon: Esther van Herk)

De verzekering biedt een dekking van € 650.000 per proefpersoon en € 5.000.000 voor het hele onderzoek (en € 7.500.000 per jaar voor alle onderzoeken van dezelfde opdrachtgever).

De verzekering dekt de volgende schade **niet**:

- schade door een risico waarover u in de schriftelijke informatie bent ingelicht. Dit geldt niet als het risico zich ernstiger voordoet dan was voorzien of als het risico heel onwaarschijnlijk was;
- schade aan uw gezondheid die ook zou zijn ontstaan als u niet aan het onderzoek had meegedaan;
- schade door het niet (volledig) opvolgen van aanwijzingen of instructies;
- schade aan uw nakomelingen, als gevolg van een negatief effect van het onderzoek op u of uw nakomelingen;
- schade door een bestaande behandelmethode bij onderzoek naar bestaande behandelmethoden.

## Bijlage C: overzicht onderzoekshandelingen

### 1. Indien u rondom de ingreep behandeld wordt met DDAVP

Dan dient u een relatief recente DDAVP-test te hebben of ondergaat u een DDAVP-test (indien uw behandeld arts het noodzakelijk vindt om een nieuwe DDAVP-test te doen, of als u nog nooit een DDAVP-test hebt gehad).

Als u eerst een DDAVP-test krijgt, zullen bij de start van de DDAVP-test 3-4 extra buisjes bloed worden afgenomen voor onderzoeksdoeleinden. Als u geen DDAVP-test meer hoeft te ondergaan voor de start van de ingreep, dan zullen 7 tot 9 extra buisjes bloed worden afgenomen vlak voor de ingreep. Bij de start van de DDAVP-test, of in de periode voor de ingreep zult u gewogen worden en een “lean body mass” meting krijgen.

### 2. Indien u rondom de ingreep behandeld wordt met stollingsfactorconcentraat

Voor het onderzoek is het nodig dat u in de periode voor de ingreep eenmalig op 3 achtereenvolgende dagen naar het ziekenhuis komt.

Tijdens deze bezoeken gebeurt het volgende:

- Dag 1: u wordt gewogen en er wordt een “lean body mass” meting gedaan. Er wordt bloed afgenomen (6 buisjes). Meteen hierna krijgt u eenmalig een dosering stollingsfactorconcentraat toegediend. Vervolgens wordt 10 minuten na de testdosis weer bloed afgenomen (4 buisjes). Twee tot zes uur na de toediening van de testdosis wordt nogmaals bloed afgenomen (4 buisjes). Het precieze tijdstip van deze bloedafname spreekt u af met de onderzoeker. Tussen de 2<sup>e</sup> en 3<sup>e</sup> bloedafname hoeft u niet in het ziekenhuis te blijven.
- Dag 2: ongeveer 24 uur na het toedienen van het stollingsfactorconcentraat wordt bloed afgenomen (4 buisjes), dit duurt ongeveer 15 minuten.
- Dag 3: ongeveer 48 uur na het toedienen van het stollingsfactorconcentraat wordt bloed afgenomen (4 buisjes), dit duurt ongeveer 15 minuten.

| In de periode voor de ingreep: eenmalig opstellen van een PK-profiel:                                                                                                                                                                                                                                                                                       |                                                                                   |                                                                                     |
|-------------------------------------------------------------------------------------------------------------------------------------------------------------------------------------------------------------------------------------------------------------------------------------------------------------------------------------------------------------|-----------------------------------------------------------------------------------|-------------------------------------------------------------------------------------|
| <b>Dag 1:</b>                                                                                                                                                                                                                                                                                                                                               | <b>Dag 2:</b>                                                                     | <b>Dag 3:</b>                                                                       |
| <ul style="list-style-type: none"> <li>- Weegen en "lean body mass" meting</li> <li>- Bloedafname (direct voor toediening testdosis)</li> <li style="padding-left: 20px;">- Toediening testdosis stollingsfactorconcentraat</li> <li>- Bloedafname (10 minuten na toediening testdosis)</li> <li>- Bloedafname (2-6 uur na toediening testdosis)</li> </ul> | Bloedafname (+/-24 uur na testdosis)                                              | Bloedafname (+/-48 uur na toediening testdosis)                                     |
|                                                                                                                                                                                                                                                                            |  |  |

Aan de hand van de uitslagen van deze bloedafnames wordt voor u een persoonlijk farmacokinetisch model gemaakt. Rondom de ingreep wordt de dosering van het stollingsfactorconcentraat bepaald aan de hand van het farmacokinetisch model gebaseerd op gegevens van eerdere geopereerde patiënten, gecombineerd met uw persoonlijke model en de uitslagen van de dagelijkse bloedafnames na de ingreep.

### 3. Indien u behandeld wordt met DDAVP én stollingsfactorconcentraat

Dan dien je een relatief recente DDAVP-test te hebben of ondergaat u een DDAVP-test (indien uw behandelend arts het noodzakelijk vindt om een nieuwe DDAVP-test te doen, of als u nog nooit een DDAVP-test hebt gehad) (zie kopje 1).

Daarnaast zal een persoonlijk farmacokinetisch profiel gemaakt worden na toediening van stollingsfactorconcentraat (zie kopje 2). Tussen de eventuele DDAVP-test en het toedienen van stollingsfactorconcentraat voor het farmacokinetisch profiel moeten minstens 3 dagen zitten.

## Bijlage D: toestemmingsformulier volwassenen – medische interventies

### Onderzoek naar de effecten van farmacokinetische modellen bij het doseren DDAVP en/of stollingsfactorconcentraten bij patiënten met de ziekte van von Willebrand bij medische interventies

- Ik heb de informatiebrief gelezen. Ook kon ik vragen stellen. Mijn vragen zijn voldoende beantwoord. Ik had genoeg tijd om te beslissen of ik meedoe.
- Ik weet dat meedoen vrijwillig is. Ook weet ik dat ik op ieder moment kan beslissen om toch niet mee te doen of te stoppen met het onderzoek. Daarvoor hoef ik geen reden te geven.
- Ik weet dat voor de controle van het onderzoek sommige mensen mijn gegevens kunnen inzien. Die mensen staan vermeld in deze informatiebrief. Ik geef toestemming voor die inzage.
- Ik geef toestemming voor het verzamelen en gebruiken van mijn gegevens en bloedmonsters op de manier en voor de doelen die in de informatiebrief staan.
- Ik geef  **wel**
  - geen** toestemming om mijn lichaamsmateriaal nog 15 jaar na dit onderzoek te bewaren. Mogelijk kan dit later nog voor ander/meer onderzoek worden gebruikt, zoals in de informatiebrief staat.
- Ik geef  **wel**
  - geen** toestemming om mij na dit onderzoek opnieuw te benaderen voor een vervolgonderzoek.

Ik wil meedoen aan dit onderzoek.

Naam proefpersoon:

Handtekening:

Datum: \_\_/\_\_/\_\_

---

Ik verklaar dat ik deze proefpersoon volledig heb geïnformeerd over het genoemde onderzoek.

Als er tijdens het onderzoek informatie bekend wordt die de toestemming van de proefpersoon zou kunnen beïnvloeden, dan breng ik hem/haar daarvan tijdig op de hoogte.

Naam onderzoeker (of diens vertegenwoordiger):

Handtekening:

Datum: \_\_/\_\_/\_\_

---

*De proefpersoon krijgt een volledige informatiebrief mee, samen met een kopie van het getekende toestemmingsformulier.*
